# Supplementary material
Source: MDPI journal article supplement (https://www.mdpi.com/1424-8247/14/9/862)
Supplement: s1 [file s1]

## **Supporting Information**

### **Exploring the monoterpene indole alkaloid scaffold for reversing P-glycoprotein-mediated multidrug resistance in cancer**

David S. P. Cardoso<sup>1</sup>, Nikoletta Szemerédi<sup>2</sup>, Gabriella Spengler<sup>2</sup>, Silva Mulhovo<sup>3</sup>, Daniel J. V. A. dos Santos<sup>1,4</sup>, and Maria-José U. Ferreira<sup>1\*</sup>

<sup>1</sup>Research Institute for Medicines (iMed.Ulisboa), Faculty of Pharmacy, Universidade de Lisboa, Av. Prof. Gama Pinto, 1649-003 Lisbon, Portugal.

<sup>2</sup> Department of Medical Microbiology, Albert Szent-Györgyi Health Center and Faculty of Medicine, University of Szeged, Semmelweis utca 6, 6725 Szeged, Hungary.

<sup>3</sup>Centro de Estudos Moçambicanos e de Etnociências (CEMEC), Faculdade de Ciências Naturais e Matemática, Universidade Pedagógica Campus de Lhanguene, Av. de Moçambique, 21402161 Maputo, Moçambique.

<sup>4</sup>LAQV@REQUIMTE/Department of Chemistry and Biochemistry, Faculty of Sciences, University of Porto, Rua do Campo Alegre, 4169-007 Porto, Portugal.

#### **Corresponding Author**

\* Phone: +351 217946475. Fax: +351 217946470. E-mail: [mjuferreira@ff.ulisboa.pt](mailto:mjuferreira@ff.ulisboa.pt).

## **Table of Contents:**

|      |                                    |          |
|------|------------------------------------|----------|
| I)   | Rhodamine-123 Accumulation Assays  | Page S3  |
| II)  | Flow Cytometry Data                | Page S7  |
| III) | TPSA and hydrogen-bond descriptors | Page S12 |
| IV)  | Combinational chemotherapy results | Page S13 |
| V)   | NMR spectra                        | Page S14 |
| VI)  | Computational studies              | Page S48 |

# I) Rhodamine-123 Accumulation Assays (Compounds 1, 3-32)

**Table S1.** Multidrug resistance inhibitory activities of parental compound (**1**), and derivatives **3-32** on mouse T-lymphoma cells (L5178Y cells).

| 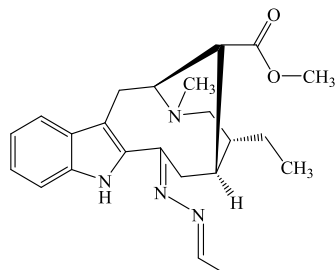 |                                                                                     |  |                  |                  |                  |                   |
|-----------------------------------------------------------------------------------|-------------------------------------------------------------------------------------|------------------------------------------------------------------------------------|------------------|------------------|------------------|-------------------|
| <b>3-21</b>                                                                       |                                                                                     | <b>22-32</b>                                                                       |                  |                  |                  |                   |
| Compound                                                                          | R                                                                                   | Conc (μM)                                                                          | FAR <sup>a</sup> | FSC <sup>b</sup> | SSC <sup>c</sup> | FL-1 <sup>d</sup> |
| PAR cells                                                                         | -                                                                                   | -                                                                                  | -                | 1846             | 568              | 99.3              |
| MDR cells                                                                         | -                                                                                   | -                                                                                  | -                | 2083             | 1051             | 0.40              |
| <b>1</b>                                                                          | <b>Dregamine</b>                                                                    | 0.2                                                                                | 1.10             | 2368             | 1374             | 2.140             |
|                                                                                   |                                                                                     | 2                                                                                  | 1.03             | 2366             | 1390             | 2.010             |
| <b>3</b>                                                                          |   | 0.2                                                                                | 0.81             | 2394             | 1427             | 1.570             |
|                                                                                   |                                                                                     | 2                                                                                  | 1.22             | 2340             | 1389             | 2.380             |
| <b>4</b>                                                                          |  | 0.2                                                                                | 4.99             | 2325             | 1366             | 9.700             |
|                                                                                   |                                                                                     | 2                                                                                  | 33.9             | 2313             | 1367             | 56.000            |
| <b>5</b>                                                                          |  | 0.2                                                                                | 3.16             | 2151             | 797              | 13.1              |
|                                                                                   |                                                                                     | 2                                                                                  | 22.72            | 2096             | 800              | 94.3              |
| <b>6</b>                                                                          |  | 0.2                                                                                | 5.78             | 2155             | 798              | 24.0              |
|                                                                                   |                                                                                     | 2                                                                                  | 24.34            | 2102             | 799              | 101               |
| <b>7</b>                                                                          |  | 0.2                                                                                | 7.54             | 2134             | 798              | 31.3              |
|                                                                                   |                                                                                     | 2                                                                                  | 25.06            | 2078             | 847              | 104               |
| <b>8</b>                                                                          |  | 0.2                                                                                | 6.82             | 2155             | 807              | 28.3              |
|                                                                                   |                                                                                     | 2                                                                                  | 23.61            | 2115             | 844              | 98.0              |
| <b>9</b>                                                                          |  | 0.2                                                                                | 6.55             | 2216             | 847              | 27.2              |
|                                                                                   |                                                                                     | 2                                                                                  | 22.60            | 2153             | 803              | 93.8              |
| <b>10</b>                                                                         |                                                                                     | 0.2                                                                                | 1.70             | 2223             | 831              | 7.05              |

|    |                                                                                     |     |        |      |      |      |
|----|-------------------------------------------------------------------------------------|-----|--------|------|------|------|
| 11 | 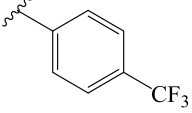   | 2   | 15.69  | 2208 | 844  | 65.1 |
|    |                                                                                     | 0.2 | 2.70   | 2223 | 852  | 11.2 |
| 12 |    | 2   | 15.88  | 2166 | 840  | 65.9 |
|    |                                                                                     | 0.2 | 11.57  | 2198 | 847  | 48.0 |
| 13 |    | 2   | 26.51  | 2196 | 830  | 110  |
|    |                                                                                     | 0.2 | 1.31   | 2190 | 823  | 5.42 |
| 14 |    | 2   | 5.25   | 2195 | 864  | 21.8 |
|    |                                                                                     | 0.2 | 2.37   | 2186 | 822  | 9.83 |
| 15 |    | 2   | 16.63  | 2131 | 835  | 69.0 |
|    |                                                                                     | 0.2 | 7.08   | 2196 | 831  | 29.4 |
| 16 |   | 2   | 26.51  | 2084 | 875  | 110  |
|    |                                                                                     | 0.2 | 3.50   | 2184 | 1035 | 2.40 |
| 17 |  | 2   | 104.59 | 2190 | 1035 | 71.8 |
|    |                                                                                     | 0.2 | 11.99  | 2203 | 1028 | 8.23 |
| 18 |  | 2   | 100.07 | 2174 | 1021 | 68.7 |
|    |                                                                                     | 0.2 | 30.74  | 2215 | 1036 | 21.1 |
| 19 |  | 2   | 126.58 | 2177 | 1059 | 86.9 |
|    |                                                                                     | 0.2 | 16.31  | 2197 | 1047 | 11.2 |
| 20 |  | 2   | 128.48 | 2164 | 1056 | 88.2 |
|    |                                                                                     | 0.2 | 6.07   | 2200 | 1055 | 4.17 |
| 21 |  | 2   | 106.19 | 2174 | 1067 | 72.9 |
|    |                                                                                     | 0.2 | 3.00   | 2180 | 1058 | 2.06 |

|    |                                                                                     |     |       |      |      |      |
|----|-------------------------------------------------------------------------------------|-----|-------|------|------|------|
| 22 | 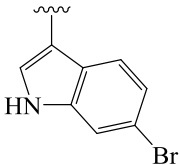   | 2   | 95.56 | 2179 | 1033 | 65.6 |
|    |    | 0.2 | 1.36  | 2163 | 1038 | 0.93 |
|    |                                                                                     | 2   | 2.93  | 2149 | 1044 | 2.01 |
| 23 |    | 0.2 | 0.96  | 2158 | 1018 | 0.66 |
|    |                                                                                     | 2   | 1.10  | 2108 | 1070 | 0.76 |
| 24 |    | 0.2 | 1.06  | 2176 | 1040 | 0.73 |
|    |                                                                                     | 2   | 1.82  | 2170 | 1044 | 1.25 |
| 25 |    | 0.2 | 1.26  | 2162 | 1057 | 0.87 |
|    |                                                                                     | 2   | 5.93  | 2134 | 1045 | 4.07 |
| 26 |   | 0.2 | 1.00  | 2331 | 1365 | 8.01 |
|    |                                                                                     | 2   | 8.77  | 2251 | 1401 | 70.5 |
| 27 |  | 0.2 | 0.81  | 2235 | 1407 | 6.51 |
|    |                                                                                     | 2   | 3.20  | 2291 | 1440 | 25.7 |
| 28 |  | 0.2 | 0.79  | 2266 | 1441 | 6.39 |
|    |                                                                                     | 2   | 7.80  | 2256 | 1463 | 62.7 |
| 29 |                                                                                     | 0.2 | 1.16  | 2254 | 1459 | 9.34 |
|    |  | 2   | 7.44  | 2245 | 1474 | 59.8 |
| 30 |  | 0.2 | 1.06  | 2255 | 1436 | 8.53 |
|    |                                                                                     | 2   | 7.29  | 2223 | 1478 | 58.6 |
| 31 |  | 0.2 | 0.73  | 2243 | 1467 | 5.88 |
|    |                                                                                     | 2   | 4.80  | 2231 | 1503 | 38.6 |

**32**

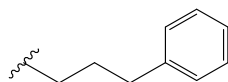

|     |      |      |      |      |
|-----|------|------|------|------|
| 0.2 | 1.41 | 2227 | 1414 | 11.3 |
| 2   | 6.60 | 2254 | 1454 | 53.1 |

<sup>a</sup>FAR (fluorescence activity ratio) values were determined by using the equation shown in the section 4.4.3. Verapamil 20  $\mu$ M (positive control) FAR = 6.34; DMSO 2% (negative control) FAR = 0.79; <sup>b</sup>FSC: Forward scatter count of cells in the sample; <sup>c</sup>SSC: Side scatter count of cells in the sample; <sup>d</sup>FL-1: Mean fluorescence intensity of the cells.

## II) Flow cytometry data

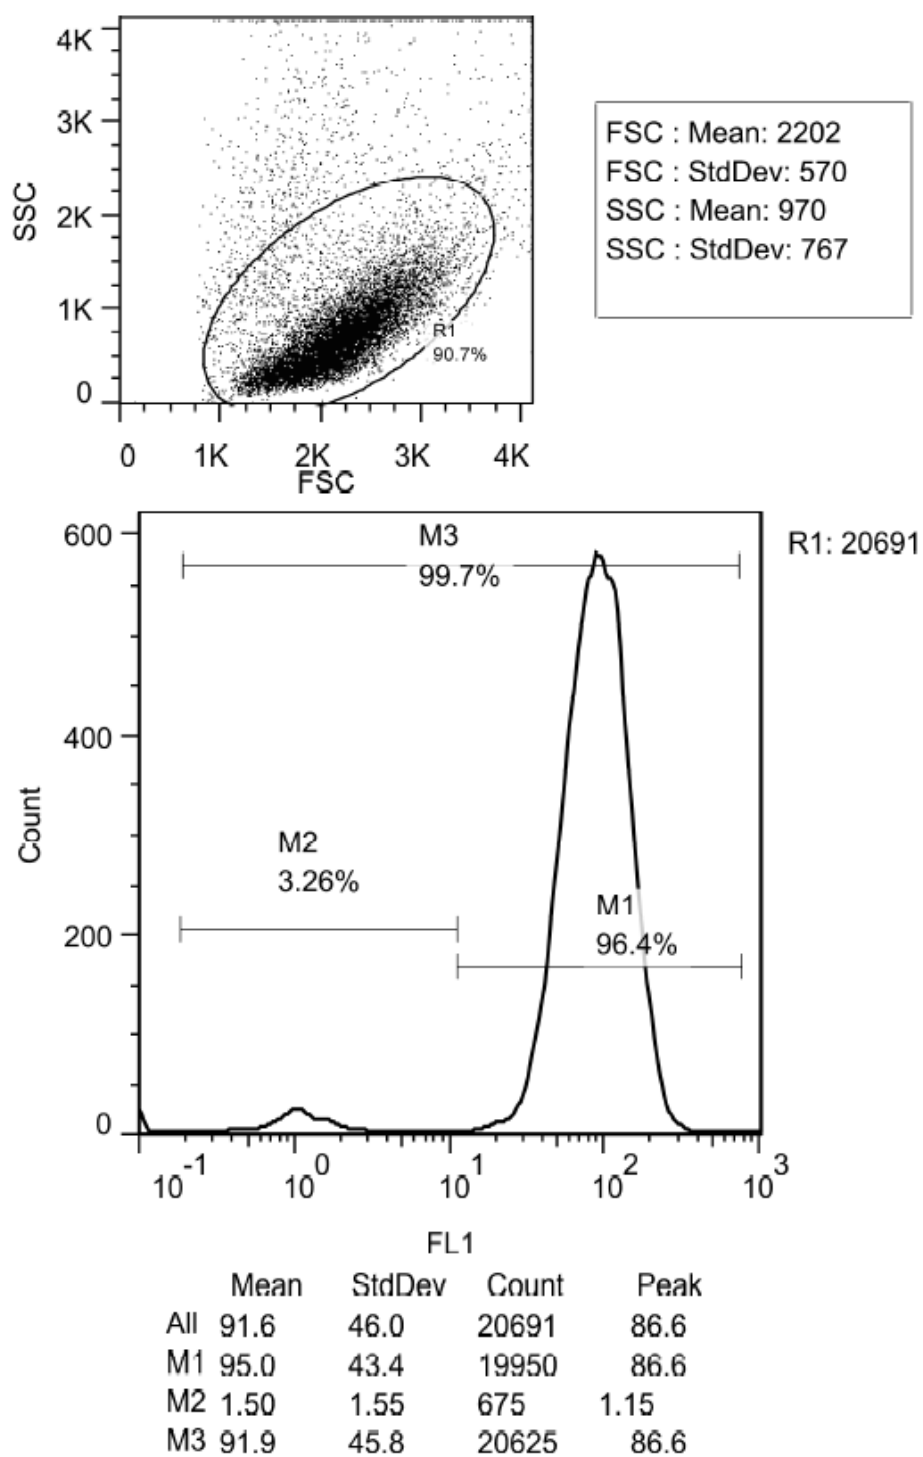

**Figure S1.** Flow cytometry data for parental (chemosensitive, PAR) mouse lymphoma cells.

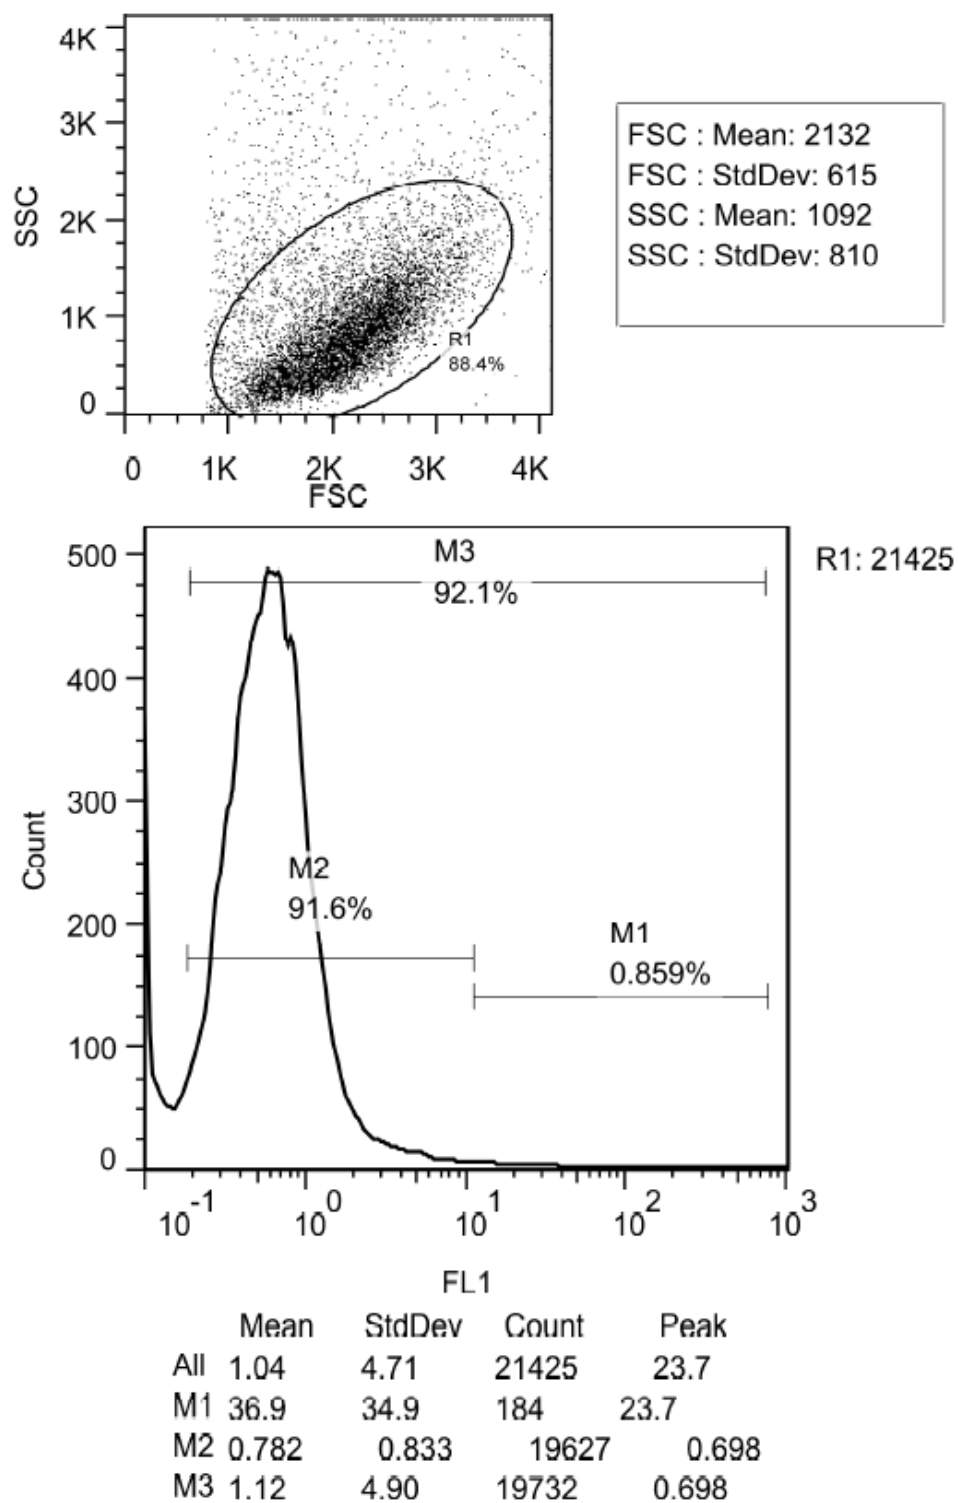

**Figure S2.** Flow cytometry data for multidrug resistant (MDR) mouse lymphoma cells.



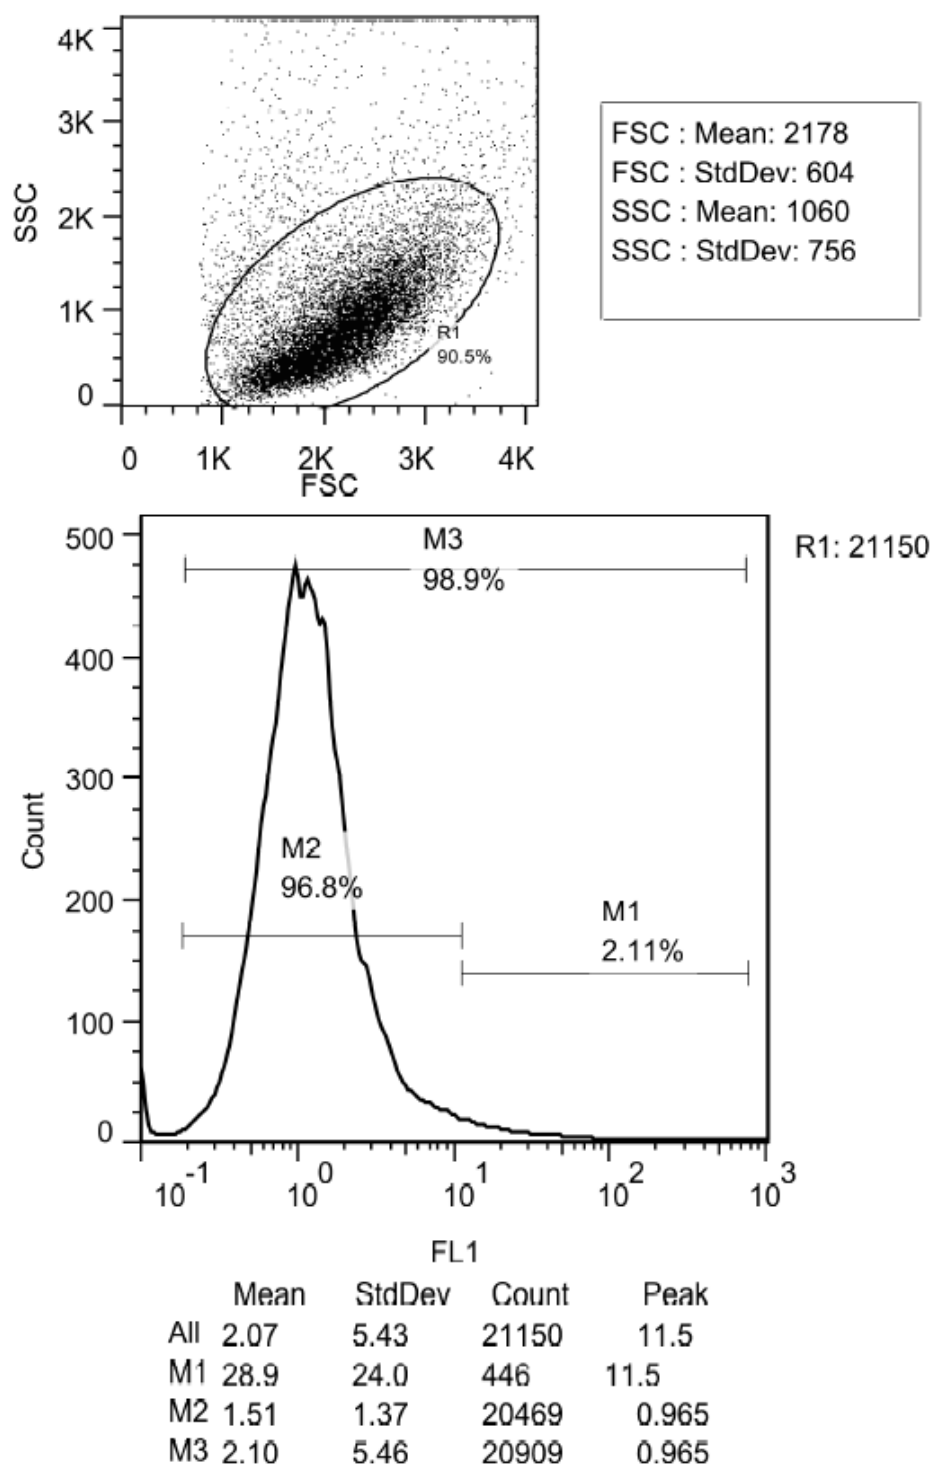

**Figure S3.** Flow cytometry data for verapamil (positive control) tested at 20  $\mu$ M in multidrug resistant (MDR) mouse lymphoma cells.

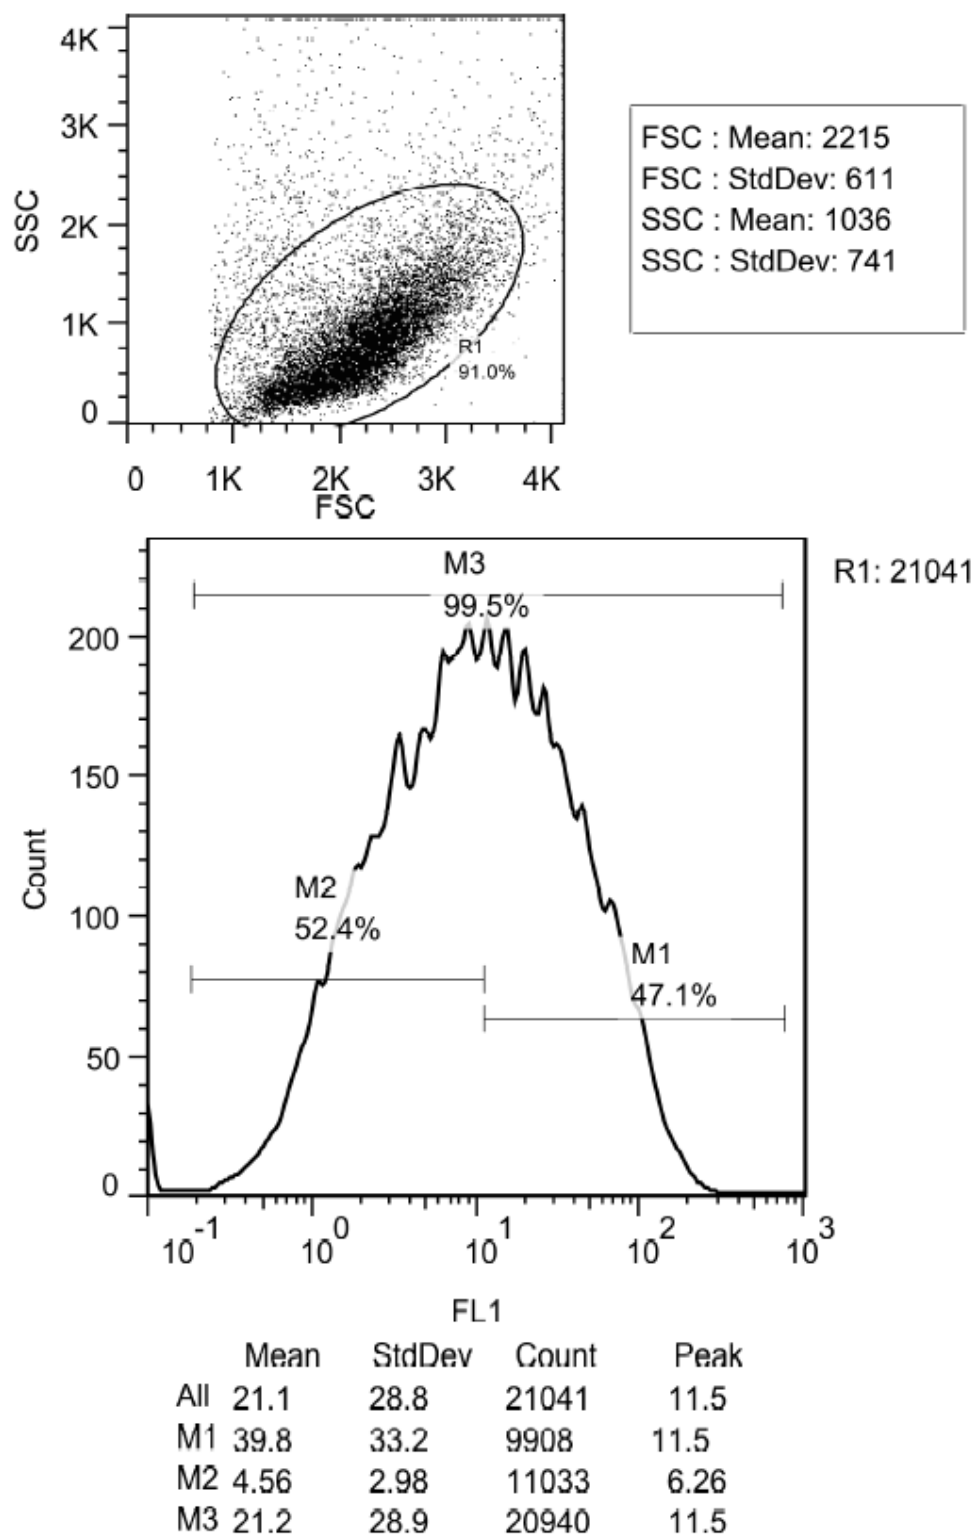

**Figure S4.** Flow cytometry data for 3-[(2''-naphthalenylmethylene)hydrazineylidene] dregamine (compound **18**) tested at 0.2  $\mu$ M in multidrug resistant (MDR) mouse lymphoma cells.

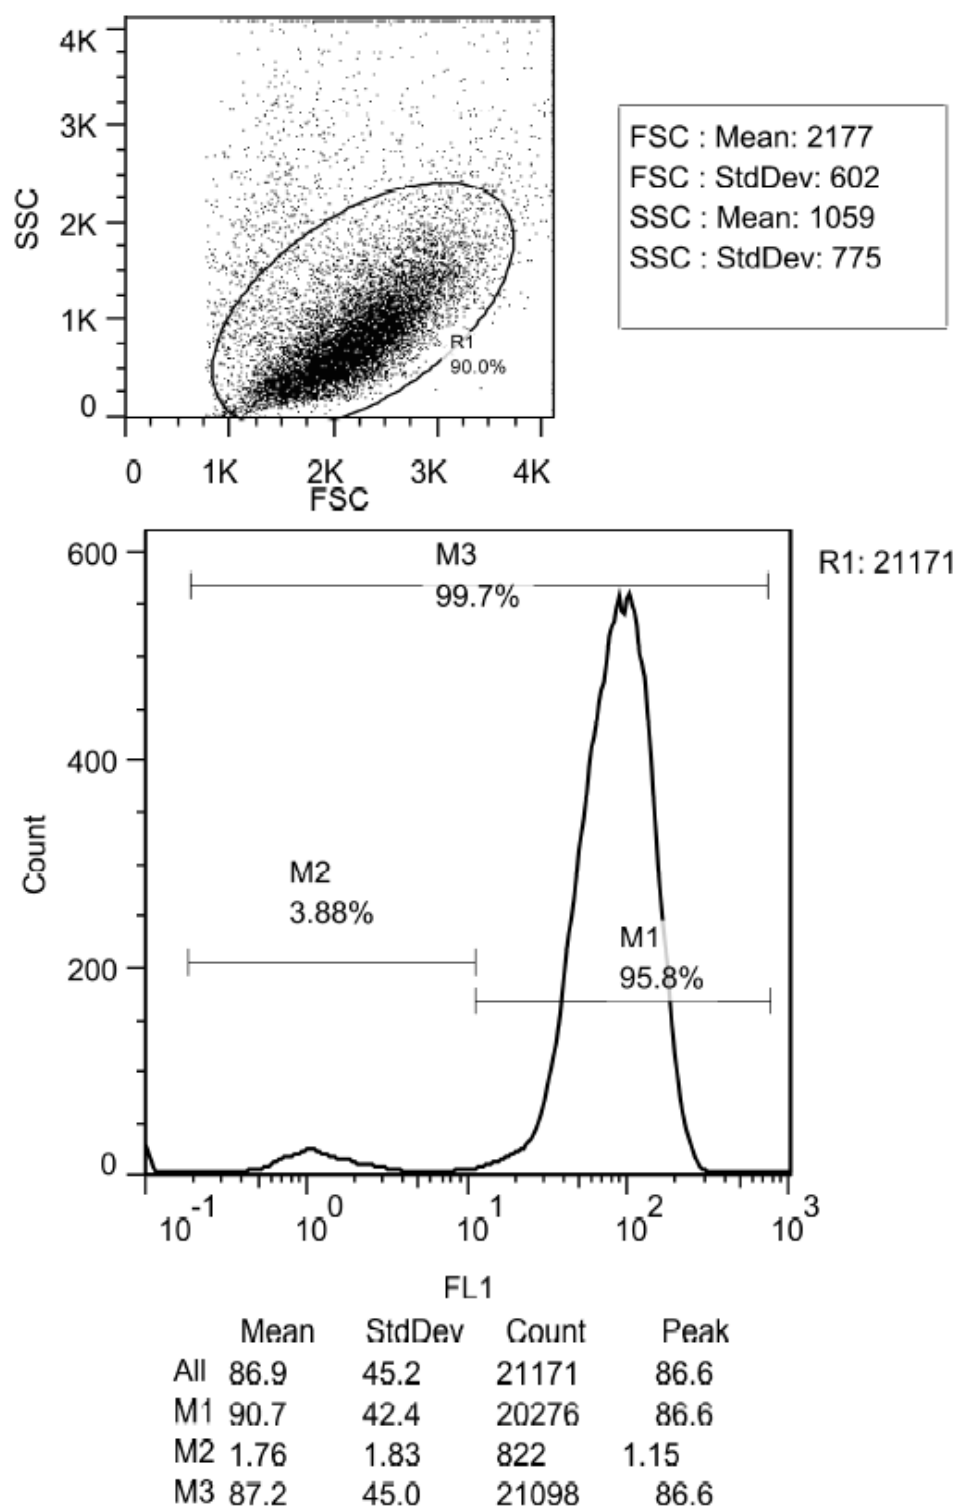

**Figure S5.** Flow cytometry data for 3-[(2''-naphthalenylmethylene)hydrazineylidene] dregamine (compound **18**) tested at 2  $\mu$ M in multidrug resistant (MDR) mouse lymphoma cells.

### III) TPSA and hydrogen-bond descriptors

**Table S2.** Calculated TPSA, HBD and HBA values for compounds **1, 3-32**.

| <b><u>Compound</u></b> | <b>TPSA (Å<sup>2</sup>)</b> | <b>HBD</b> | <b>HBA</b> |
|------------------------|-----------------------------|------------|------------|
| <b>1</b>               | 62.4                        | 1          | 3          |
| <b>3</b>               | 70.1                        | 1          | 4          |
| <b>4</b>               | 70.1                        | 1          | 4          |
| <b>5</b>               | 90.3                        | 2          | 5          |
| <b>6</b>               | 115.9                       | 1          | 4          |
| <b>7</b>               | 79.3                        | 1          | 5          |
| <b>8</b>               | 70.1                        | 1          | 4          |
| <b>9</b>               | 70.1                        | 1          | 4          |
| <b>10</b>              | 70.1                        | 1          | 4          |
| <b>11</b>              | 79.3                        | 1          | 5          |
| <b>12</b>              | 73.3                        | 1          | 4          |
| <b>13</b>              | 90.3                        | 2          | 5          |
| <b>14</b>              | 79.3                        | 1          | 5          |
| <b>15</b>              | 79.3                        | 1          | 5          |
| <b>16</b>              | 79.3                        | 1          | 5          |
| <b>17</b>              | 97.7                        | 1          | 7          |
| <b>18</b>              | 70.1                        | 1          | 4          |
| <b>19</b>              | 90.3                        | 2          | 5          |
| <b>20</b>              | 85.8                        | 2          | 4          |
| <b>21</b>              | 85.8                        | 2          | 4          |
| <b>22</b>              | 98.8                        | 3          | 4          |
| <b>23</b>              | 98.8                        | 3          | 4          |
| <b>24</b>              | 98.8                        | 3          | 4          |
| <b>25</b>              | 98.8                        | 3          | 4          |
| <b>26</b>              | 98.8                        | 3          | 4          |
| <b>27</b>              | 108.1                       | 3          | 5          |
| <b>28</b>              | 98.8                        | 3          | 4          |
| <b>29</b>              | 98.8                        | 3          | 4          |
| <b>30</b>              | 144.6                       | 3          | 4          |
| <b>31</b>              | 98.8                        | 3          | 4          |
| <b>32</b>              | 98.8                        | 3          | 4          |

TPSA (topological polar surface area), HBD (hydrogen-bond donor) and HBA (hydrogen-bond acceptor) values were obtained using MOE program software.

#### IV) Combinational chemotherapy results

**Table S3.** Effect of compounds **1, 3-32** in combination with doxorubicin on human *ABCB1*-gene transfected mouse T-lymphoma cells (MDR cells)

| Compounds | Best ratio* | CI at ED <sub>50</sub> ** | Interaction           | SD +/- |
|-----------|-------------|---------------------------|-----------------------|--------|
| 1         | 1:8.0       | 0.756                     | Moderate synergism    | 0.053  |
| 3         | 1:87.7      | 0.305                     | Synergism             | 0.046  |
| 4         | 1:30.2      | 0.079                     | Very Strong Synergism | 0.012  |
| 5         | 1:30.2      | 0.166                     | Strong Synergism      | 0.013  |
| 6         | 1:12.1      | 0.279                     | Strong Synergism      | 0.044  |
| 7         | 1:5.15      | 0.152                     | Strong Synergism      | 0.045  |
| 8         | 1:10.4      | 0.451                     | Synergism             | 0.057  |
| 9         | 1:36.6      | 0.194                     | Strong Synergism      | 0.021  |
| 10        | 1:32.5      | 0.272                     | Strong Synergism      | 0.023  |
| 11        | 1:46.8      | 0.601                     | Synergism             | 0.103  |
| 12        | 1:2.58      | 0.231                     | Strong Synergism      | 0.024  |
| 13        | 1:17.3      | 0.361                     | Synergism             | 0.027  |
| 14        | 1:48.1      | 0.402                     | Synergism             | 0.046  |
| 15        | 1:17.8      | 0.177                     | Strong Synergism      | 0.041  |
| 16        | 1:13.1      | 0.34                      | Synergism             | 0.036  |
| 17        | 1:44.0      | 0.309                     | Synergism             | 0.019  |
| 18        | 1:36.6      | 0.285                     | Strong Synergism      | 0.066  |
| 19        | 1:71.9      | 0.222                     | Strong Synergism      | 0.041  |
| 20        | 1:12.2      | 0.291                     | Strong Synergism      | 0.026  |
| 21        | 1:35.9      | 0.445                     | Synergism             | 0.051  |
| 22        | 1:9.54      | 0.219                     | Strong Synergism      | 0.024  |
| 23        | 1:13.7      | 0.163                     | Strong Synergism      | 0.021  |
| 24        | 1:25.4      | 0.301                     | Synergism             | 0.035  |
| 25        | 1:7.50      | 0.345                     | Synergism             | 0.084  |
| 26        | 1:5.72      | 0.36                      | Synergism             | 0.102  |
| 27        | 1:4.43      | 0.225                     | Strong Synergism      | 0.018  |
| 28        | 1:29.0      | 0.158                     | Strong Synergism      | 0.02   |
| 29        | 1:20.6      | 0.173                     | Strong Synergism      | 0.022  |
| 30        | 1:5.15      | 0.423                     | Synergism             | 0.035  |
| 31        | 1:18.0      | 0.296                     | Strong Synergism      | 0.023  |
| 32        | 1:4.96      | 0.384                     | Synergism             | 0.035  |

## V) NMR Spectra

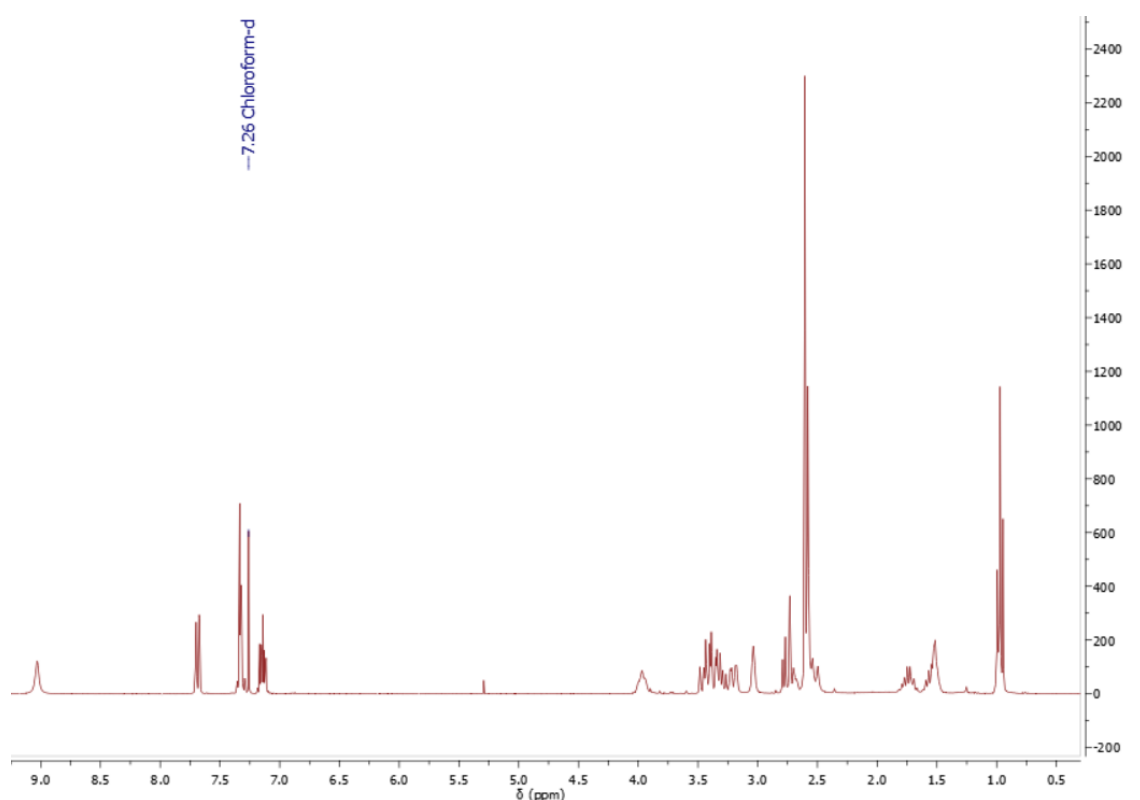

**Figure S6.** <sup>1</sup>H NMR spectrum of compound **1** (300 MHz, CDCl<sub>3</sub>).

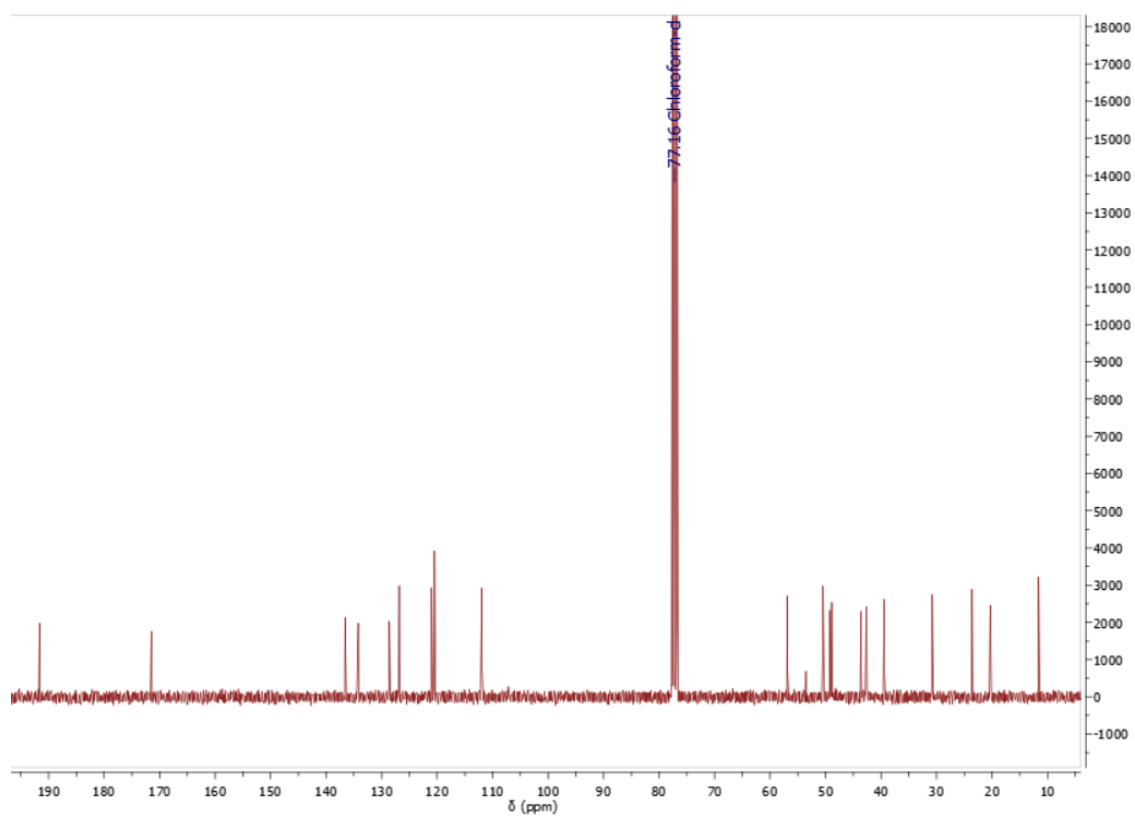

**Figure S7.** <sup>13</sup>C NMR spectrum of compound **1** (75 MHz, CDCl<sub>3</sub>).

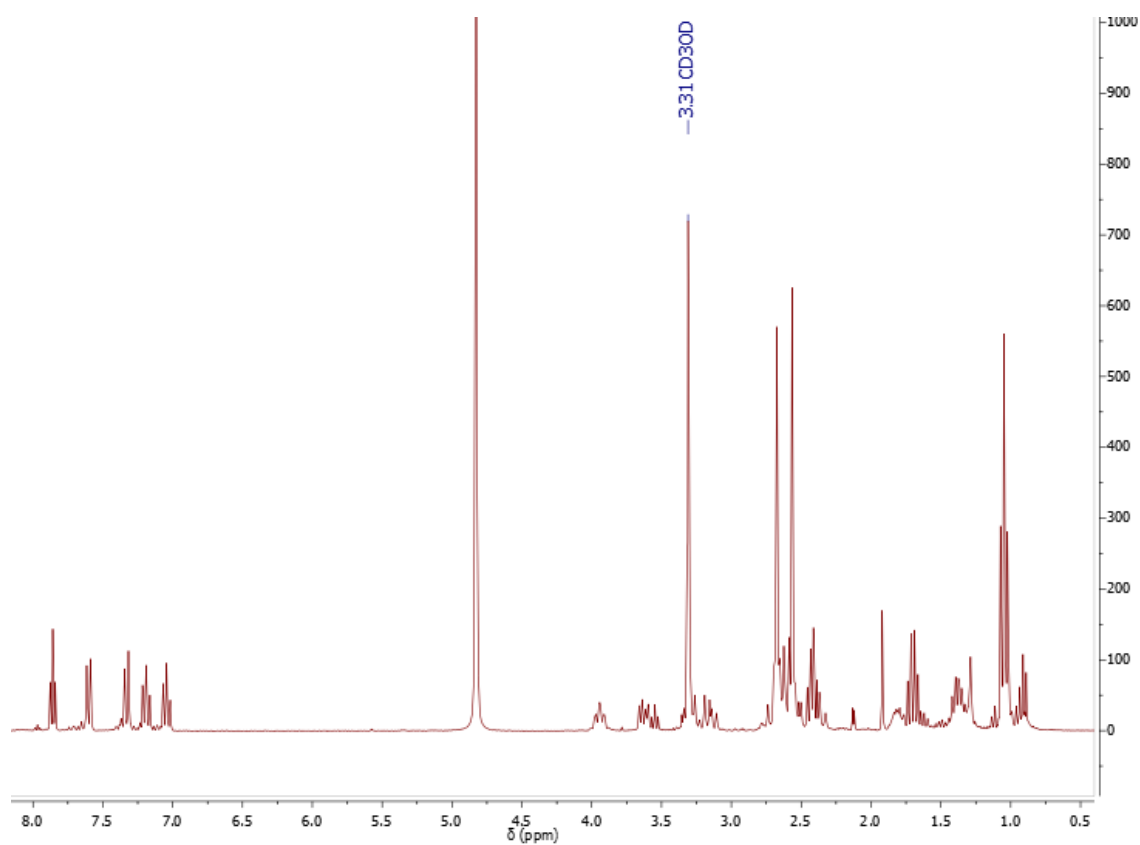

**Figure S8.**  $^1\text{H}$  NMR spectrum of compound **3** (300 MHz, MeOD).

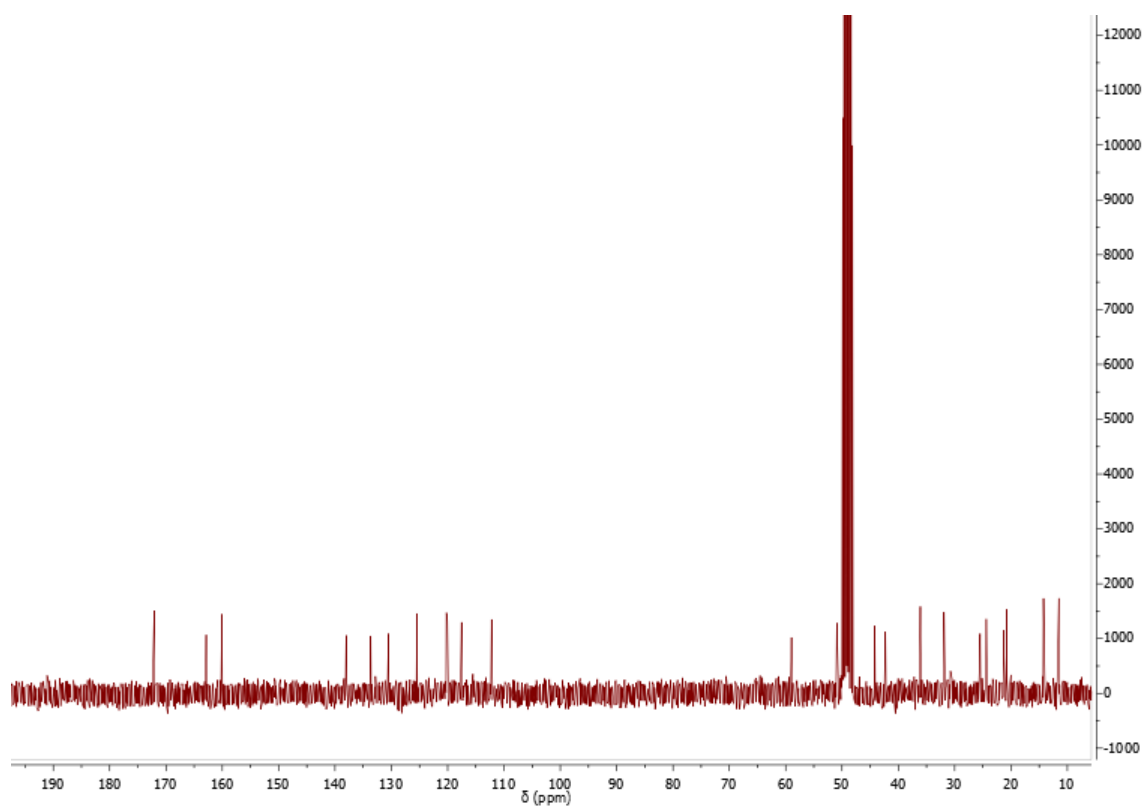

**Figure S9.**  $^{13}\text{C}$  NMR spectrum of compound **3** (75 MHz, MeOD).

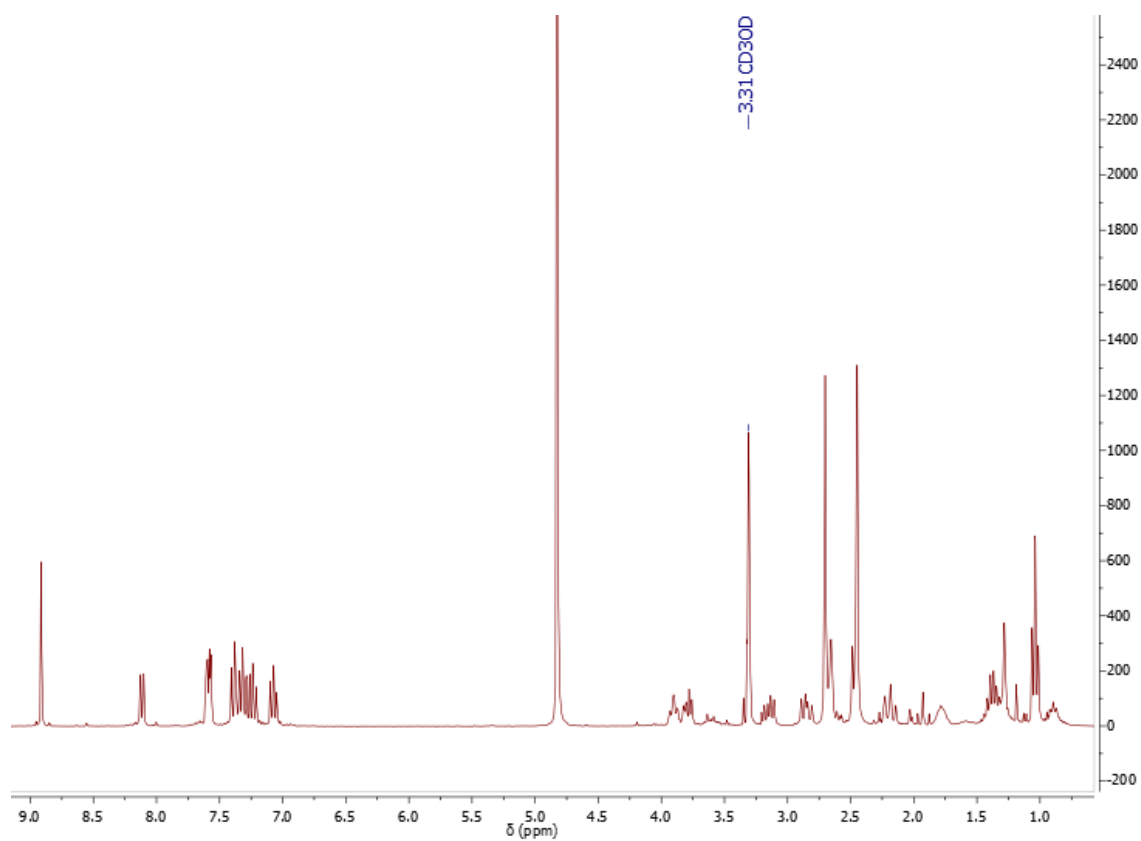

**Figure S10.** <sup>1</sup>H NMR spectrum of compound **4** (300 MHz, MeOD).

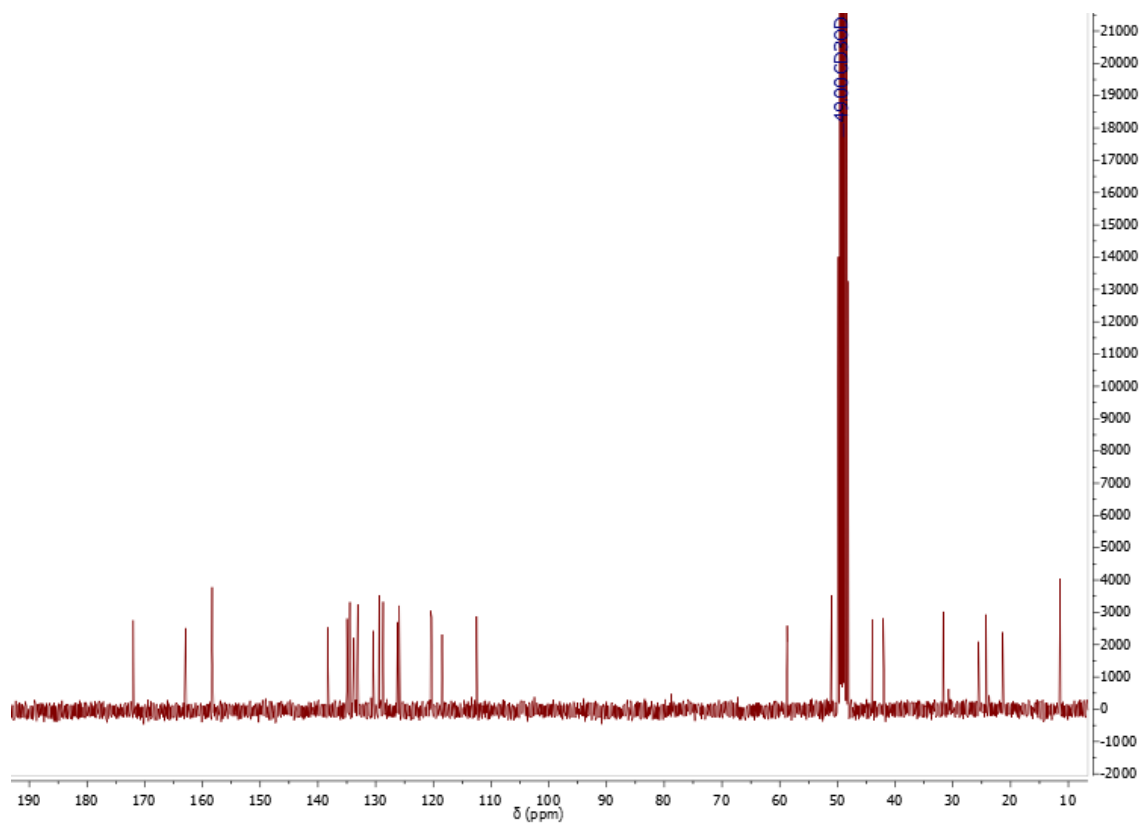

**Figure S11.** <sup>13</sup>C NMR spectrum of compound **4** (75 MHz, MeOD).



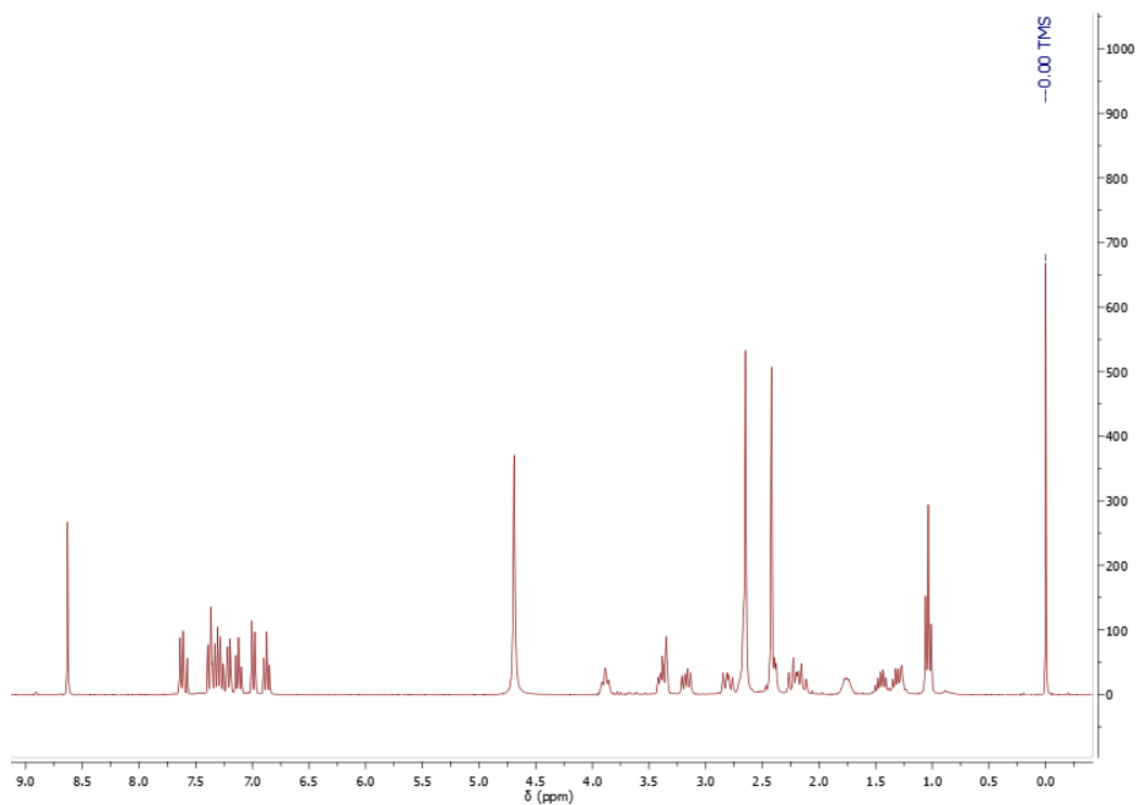

**Figure S12.**  $^1\text{H}$  NMR spectrum of compound **5** (300 MHz, MeOD +  $\text{CDCl}_3$ ).

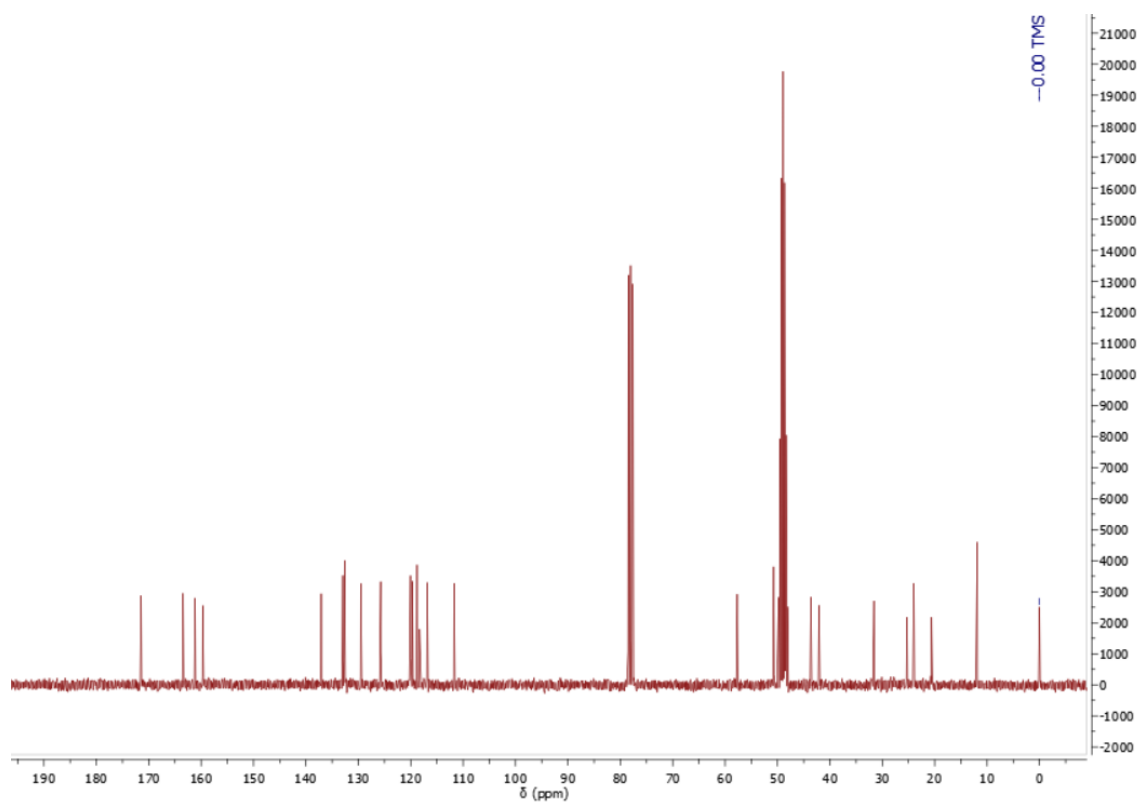

**Figure S13.**  $^{13}\text{C}$  NMR spectrum of compound **5** (75 MHz, MeOD +  $\text{CDCl}_3$ ).

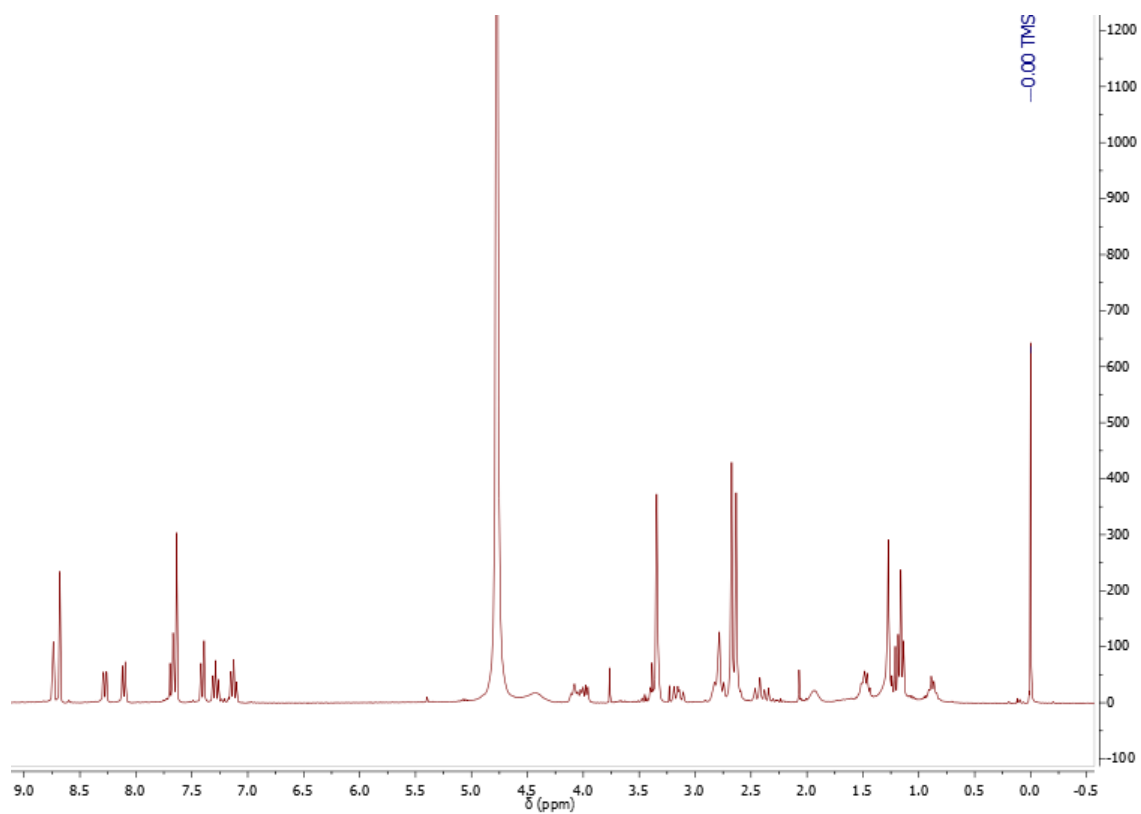

**Figure S14.**  $^1\text{H}$  NMR spectrum of compound **6** (300 MHz, MeOD +  $\text{CDCl}_3$ ).

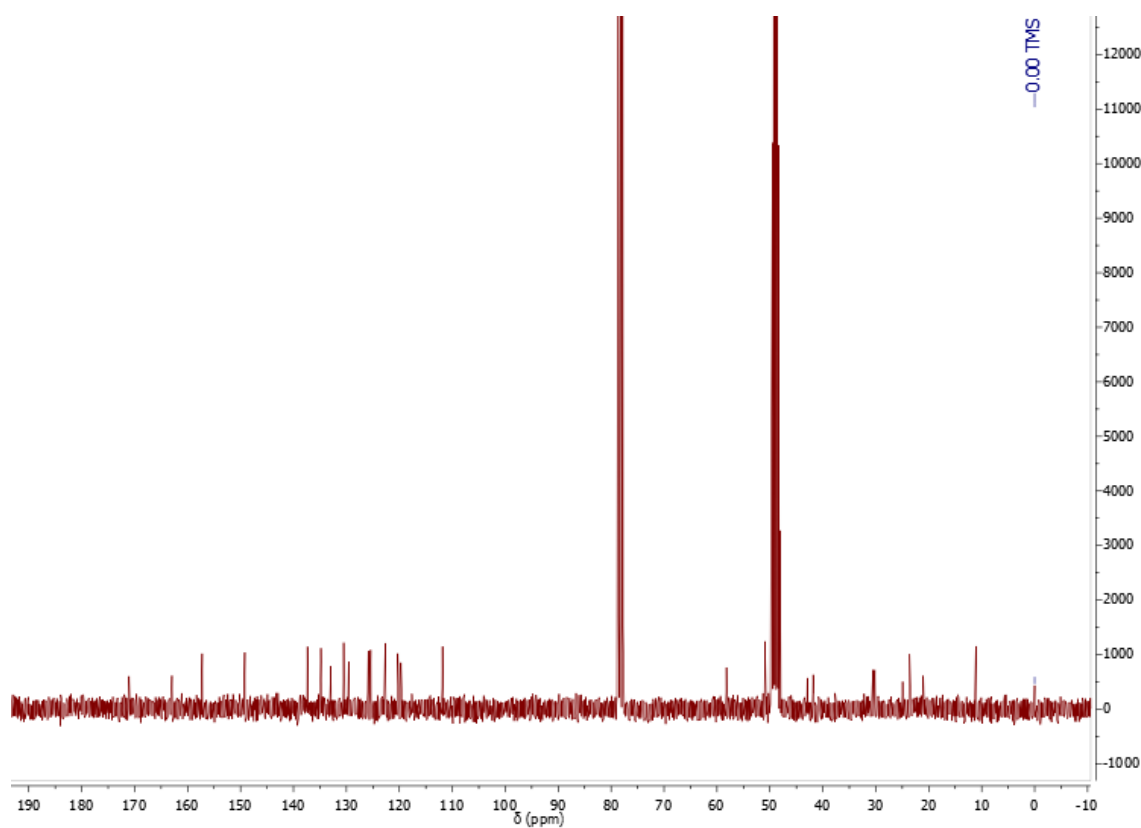

**Figure S15.**  $^{13}\text{C}$  NMR spectrum of compound **6** (75 MHz, MeOD +  $\text{CDCl}_3$ ).

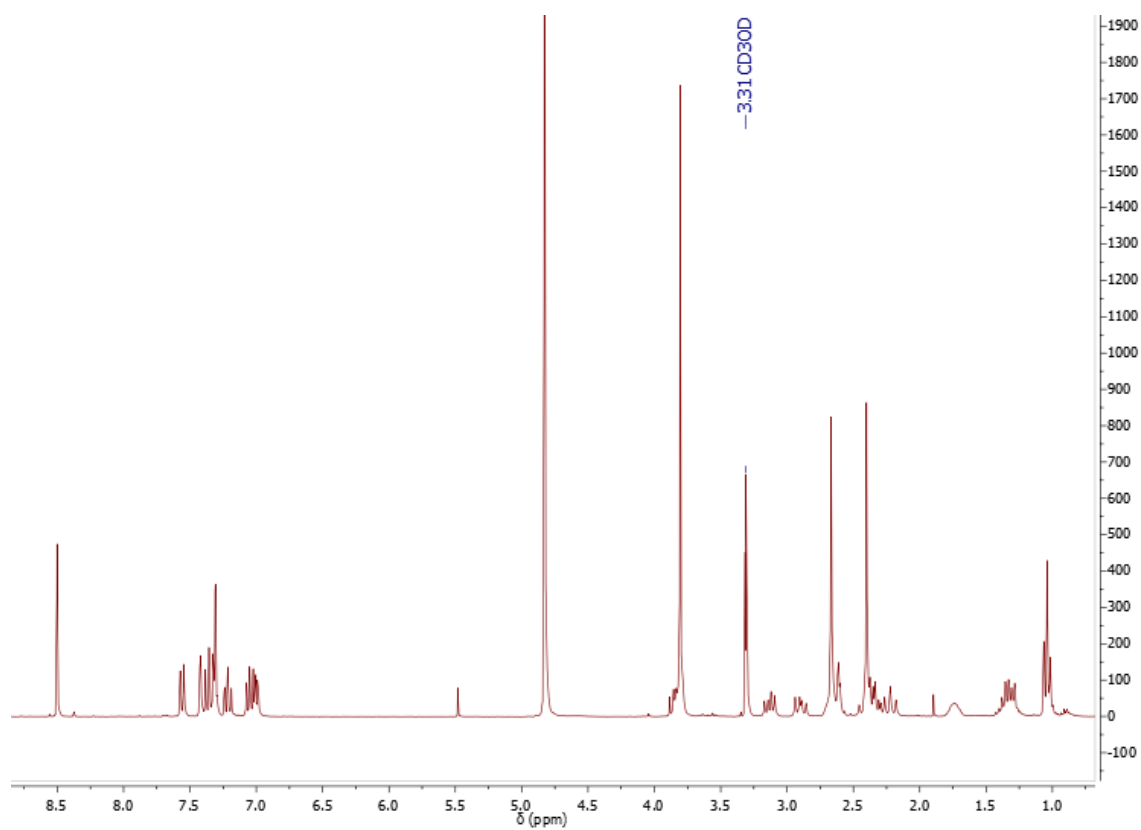

**Figure S16.**  $^1\text{H}$  NMR spectrum of compound **7** (300 MHz, MeOD).

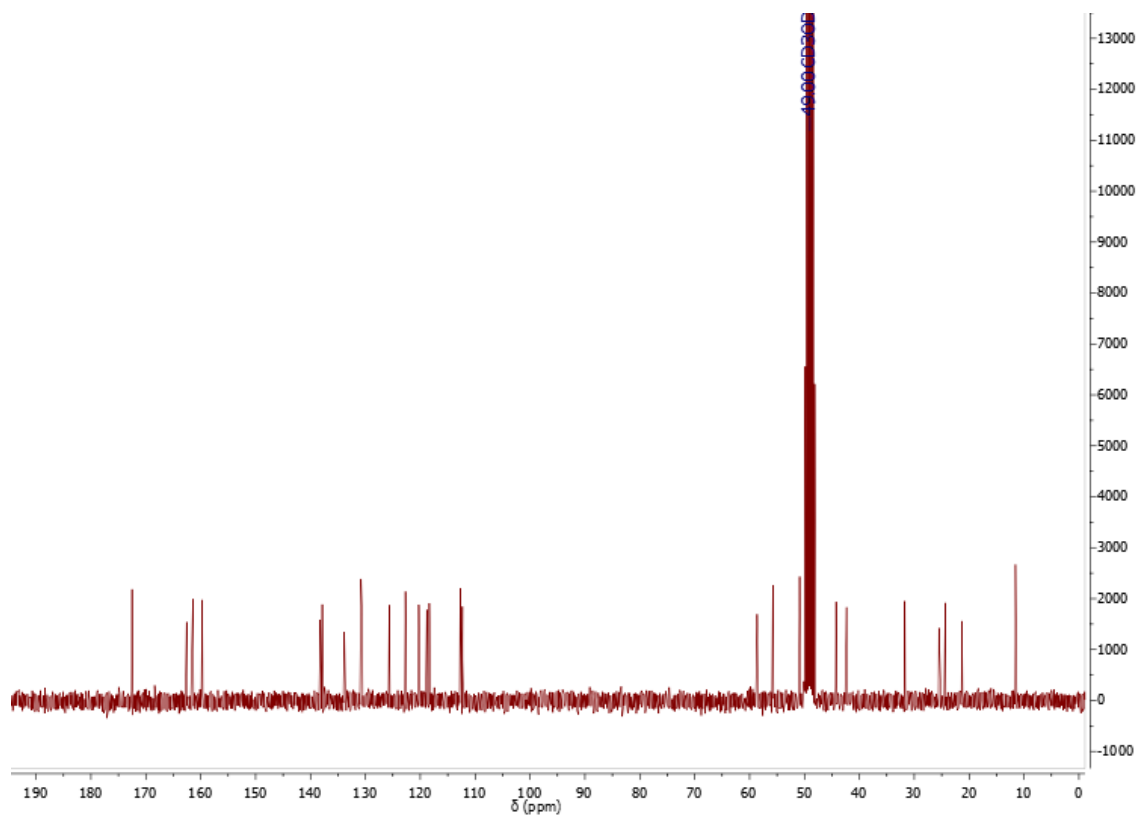

**Figure S17.**  $^{13}\text{C}$  NMR spectrum of compound **7** (75 MHz, MeOD).

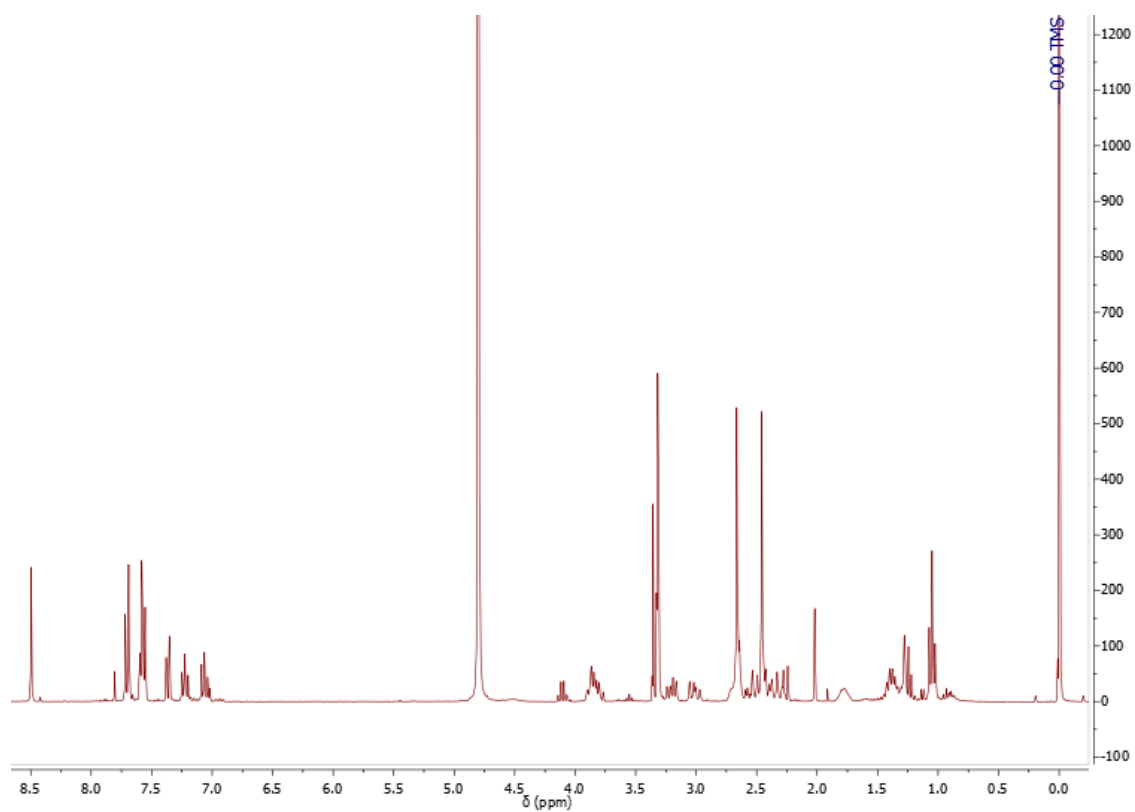

**Figure S18.**  $^1\text{H}$  NMR spectrum of compound **8** (300 MHz, MeOD +  $\text{CDCl}_3$ ).

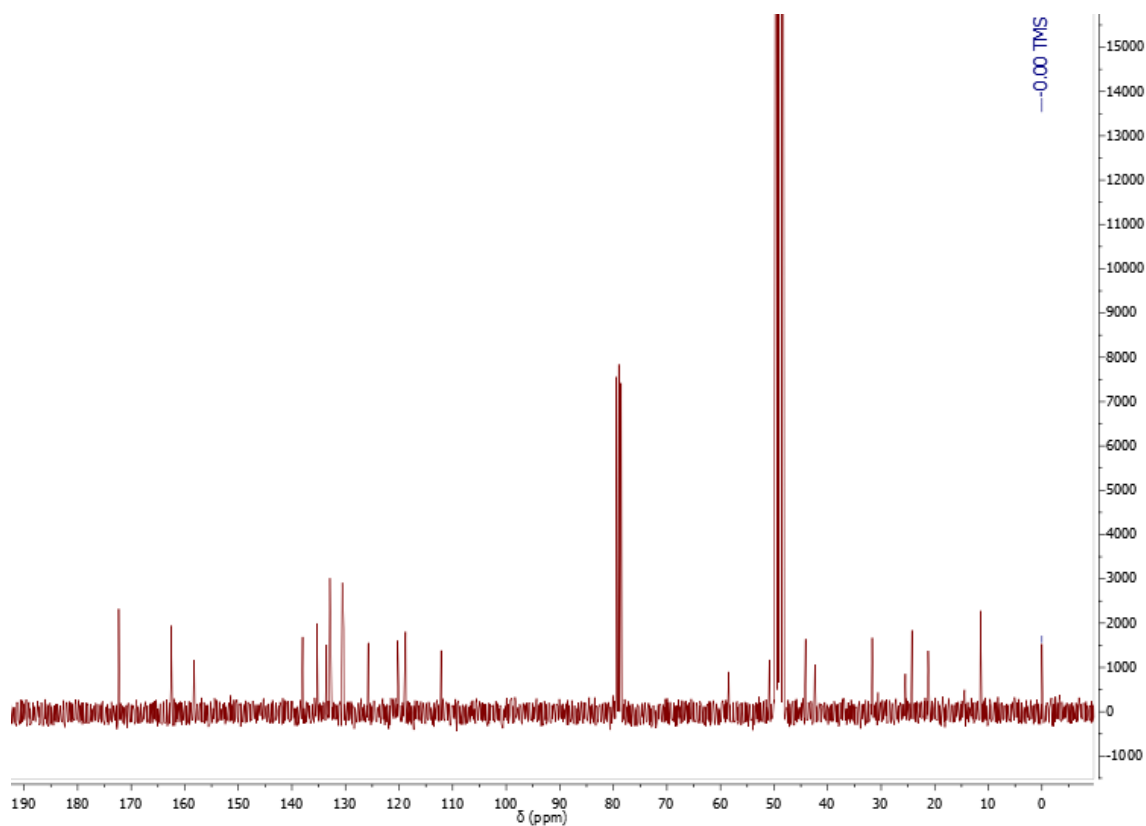

**Figure S19.**  $^{13}\text{C}$  NMR spectrum of compound **8** (75 MHz, MeOD +  $\text{CDCl}_3$ ).

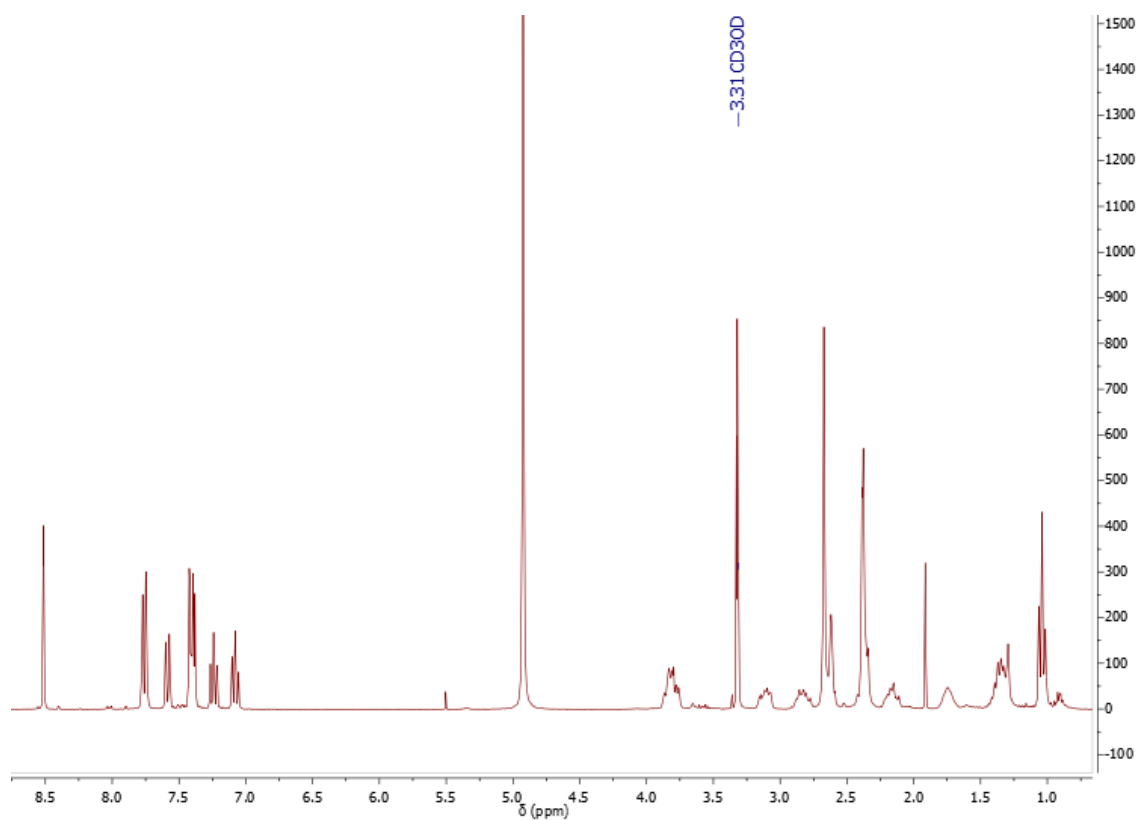

**Figure S20.** <sup>1</sup>H NMR spectrum of compound **9** (300 MHz, MeOD).

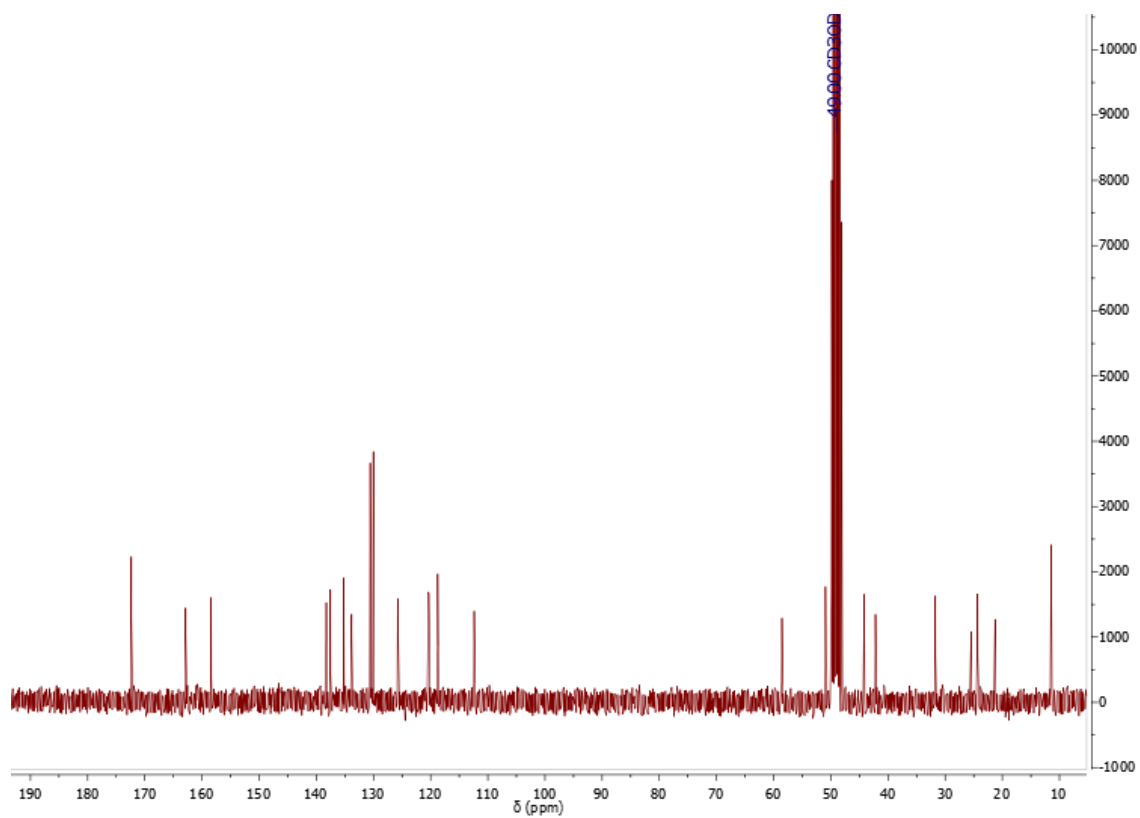

**Figure S21.** <sup>13</sup>C NMR spectrum of compound **9** (75 MHz, MeOD).

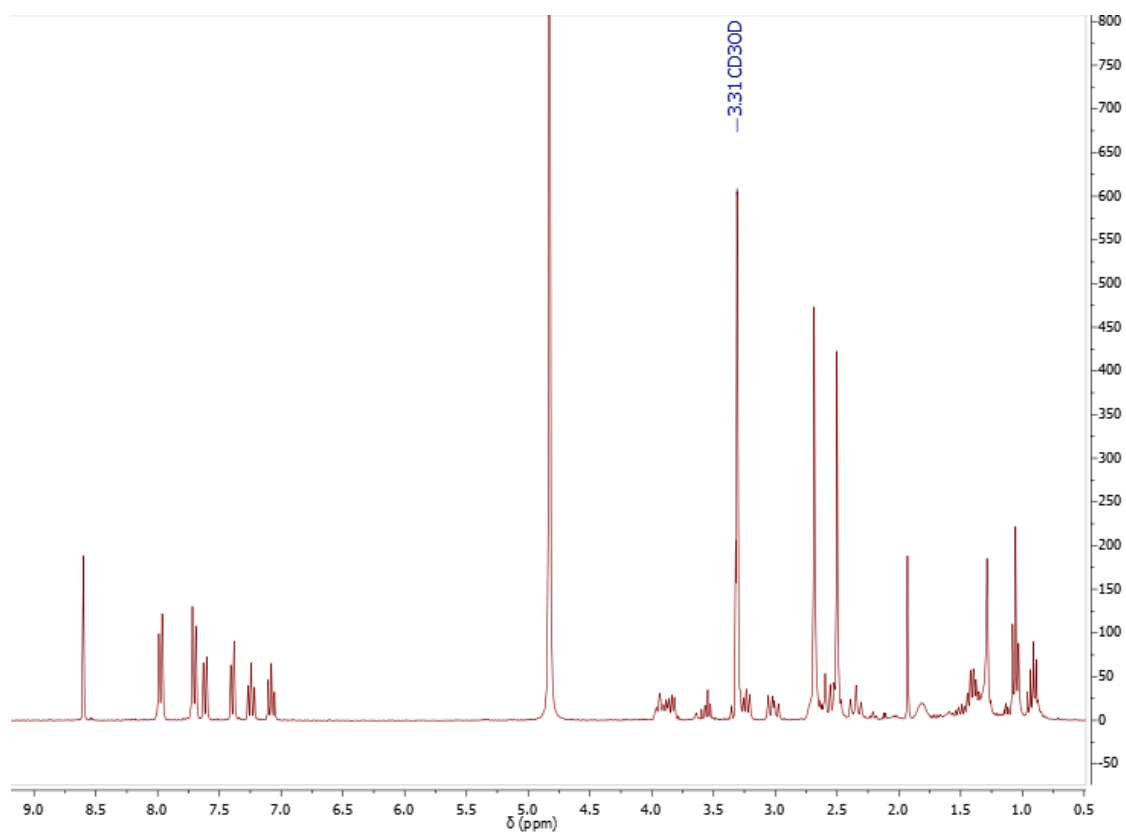

**Figure S22.** <sup>1</sup>H NMR spectrum of compound **10** (300 MHz, MeOD).

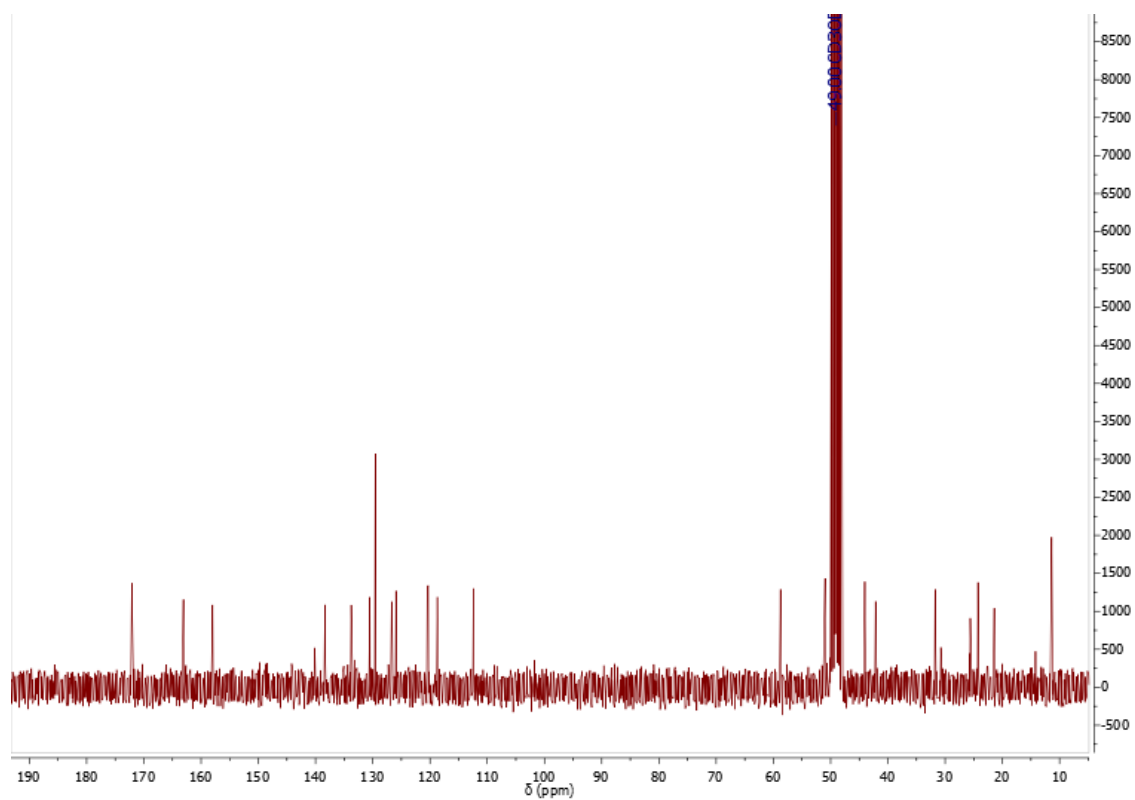

**Figure S23.** <sup>13</sup>C NMR spectrum of compound **10** (75 MHz, MeOD).

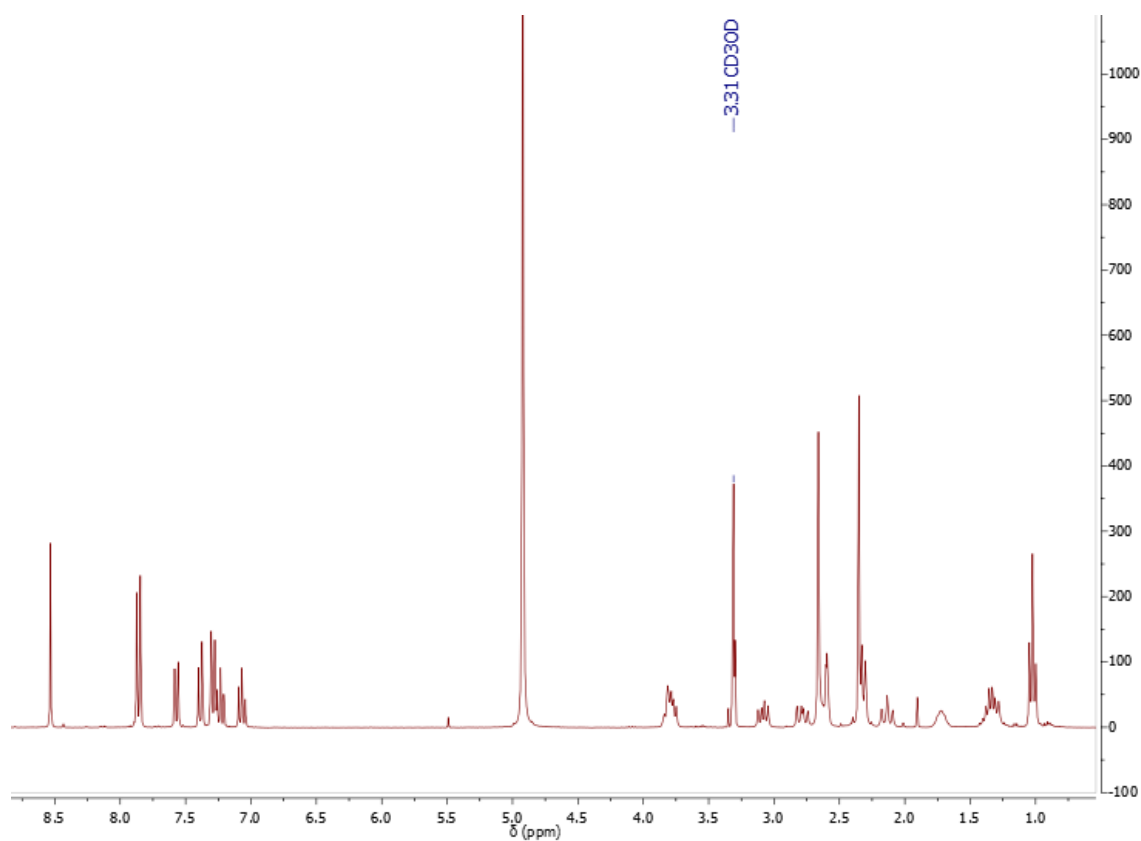

**Figure S24.**  $^1\text{H}$  NMR spectrum of compound **11** (300 MHz, MeOD).

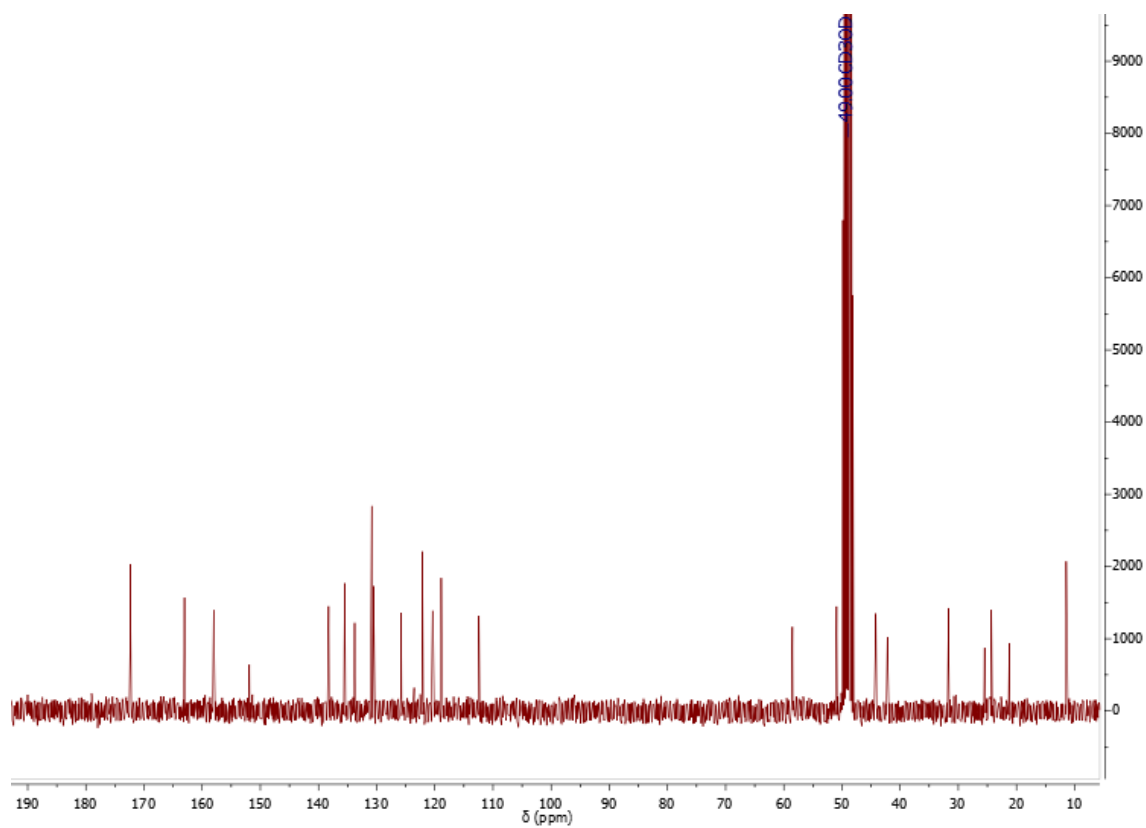

**Figure S25.**  $^{13}\text{C}$  NMR spectrum of compound **11** (75 MHz, MeOD).

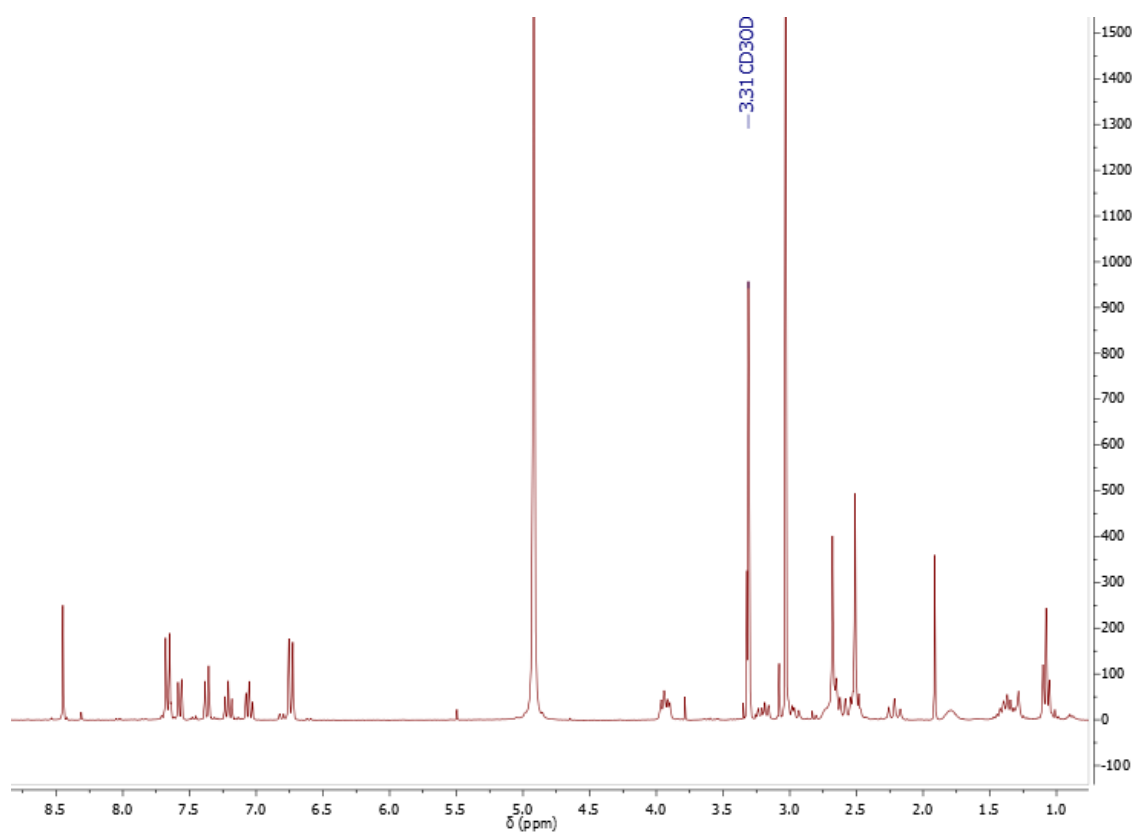

**Figure S26.**  $^1\text{H}$  NMR spectrum of compound **12** (300 MHz, MeOD).

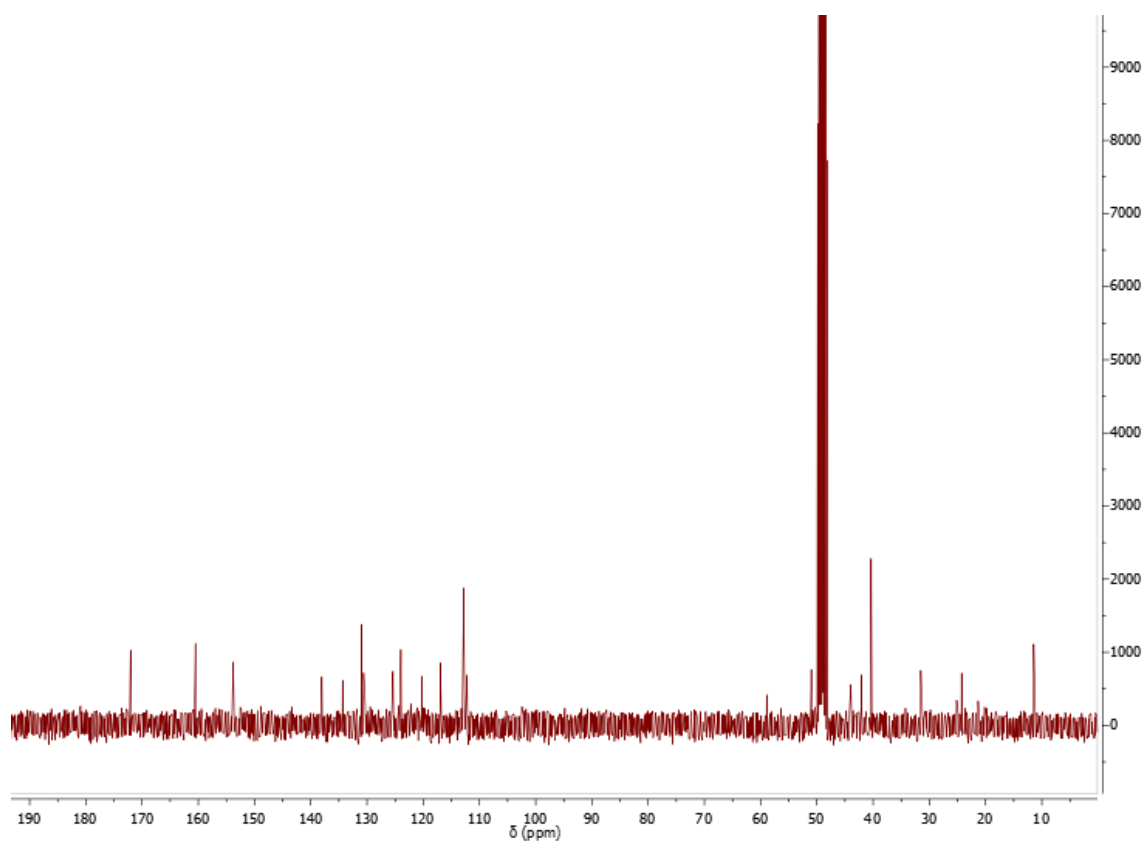

**Figure S27.**  $^{13}\text{C}$  NMR spectrum of compound **12** (75 MHz, MeOD).



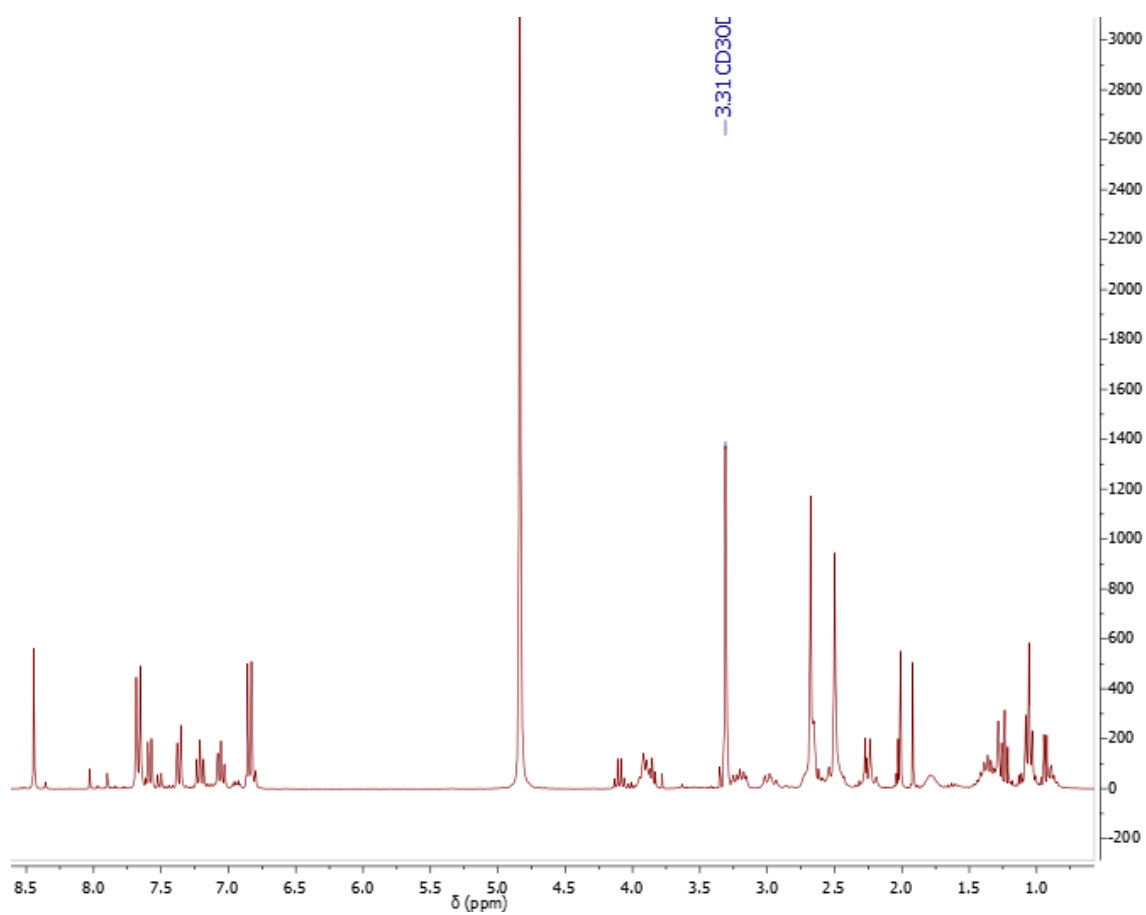

**Figure S28.**  $^1\text{H}$  NMR spectrum of compound **13** (300 MHz, MeOD).

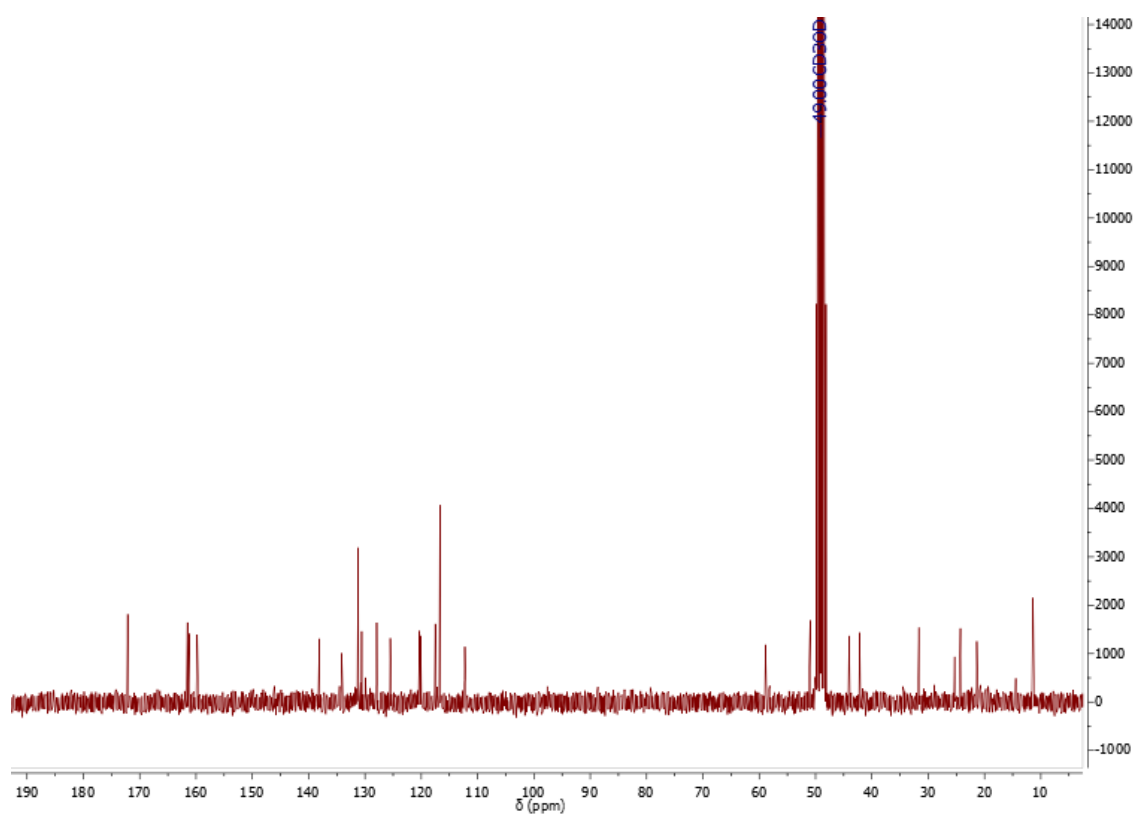

**Figure S29.**  $^{13}\text{C}$  NMR spectrum of compound **13** (75 MHz, MeOD).

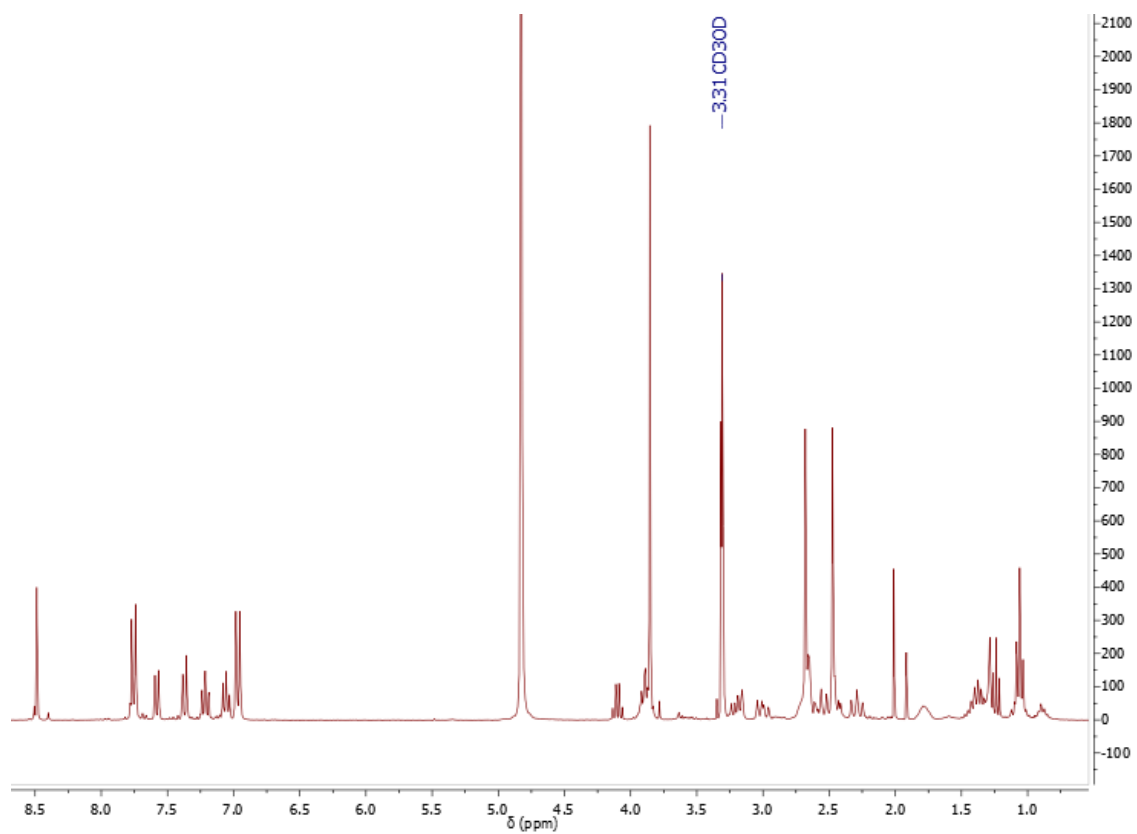

**Figure S30.**  $^1\text{H}$  NMR spectrum of compound **14** (300 MHz, MeOD).

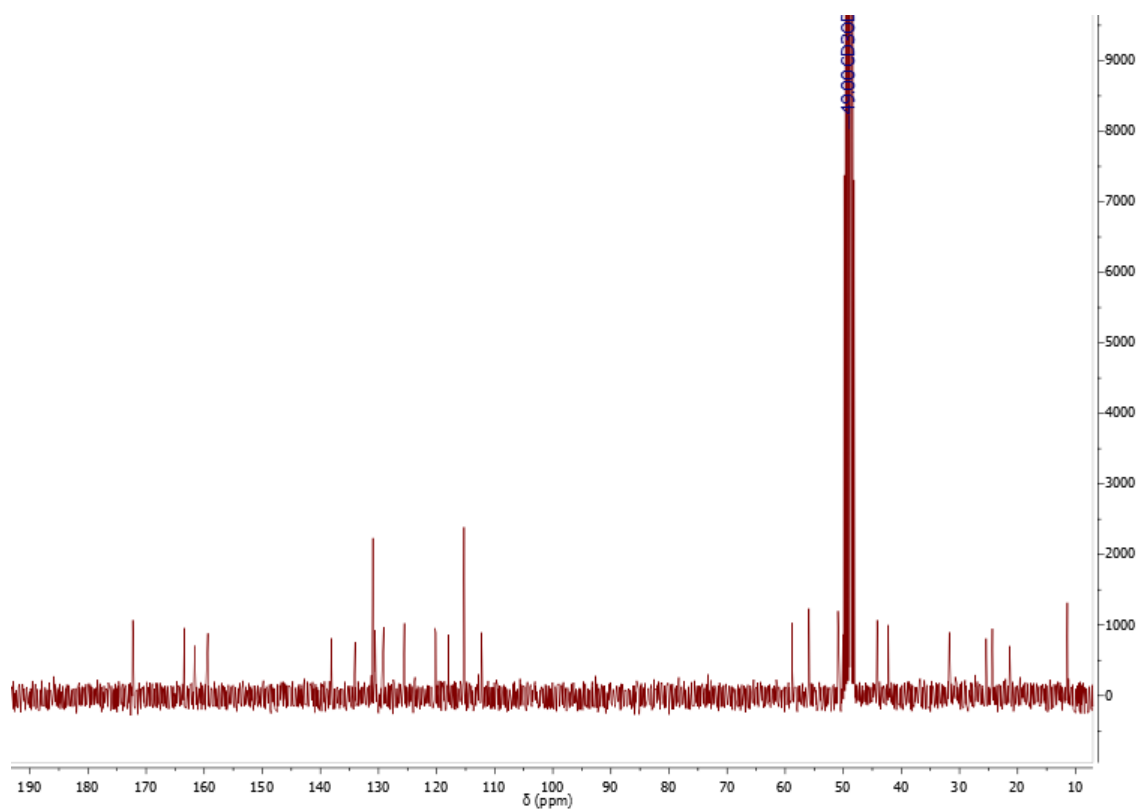

**Figure S31.**  $^{13}\text{C}$  NMR spectrum of compound **14** (75 MHz, MeOD).

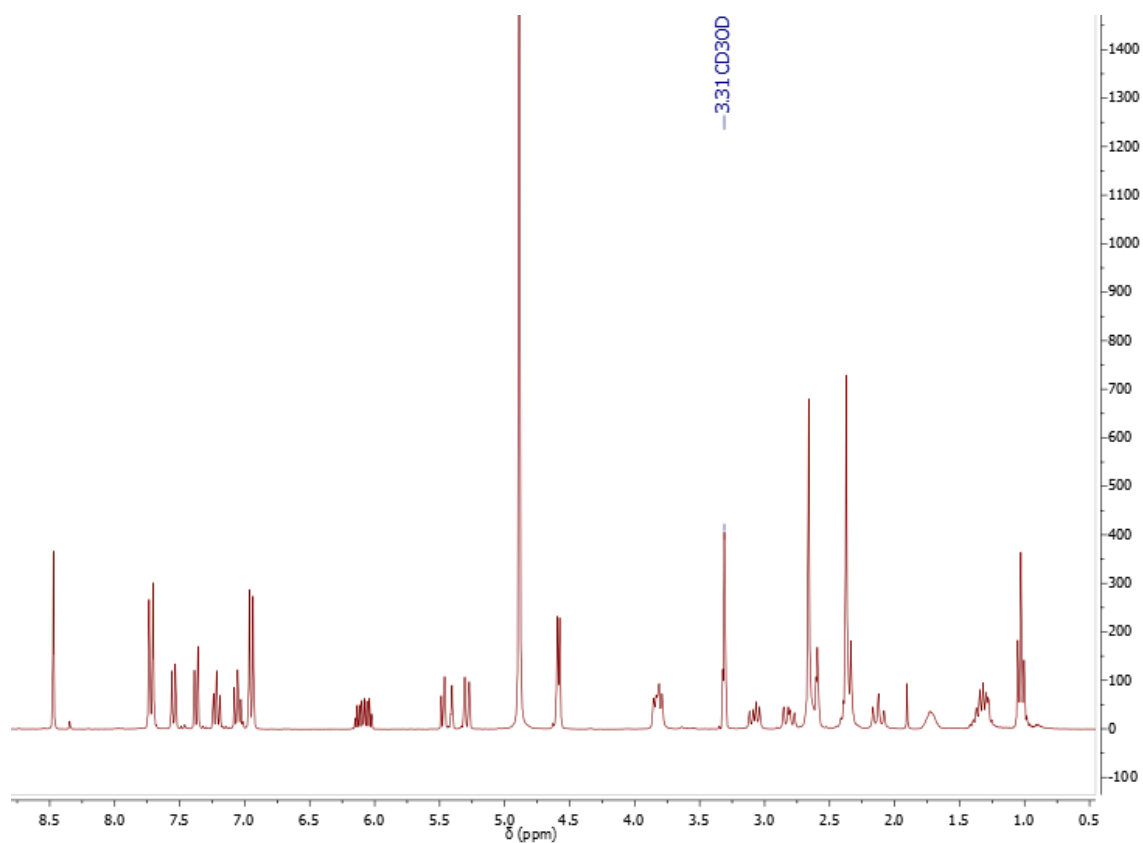

**Figure S32.** <sup>1</sup>H NMR spectrum of compound **15** (300 MHz, MeOD).

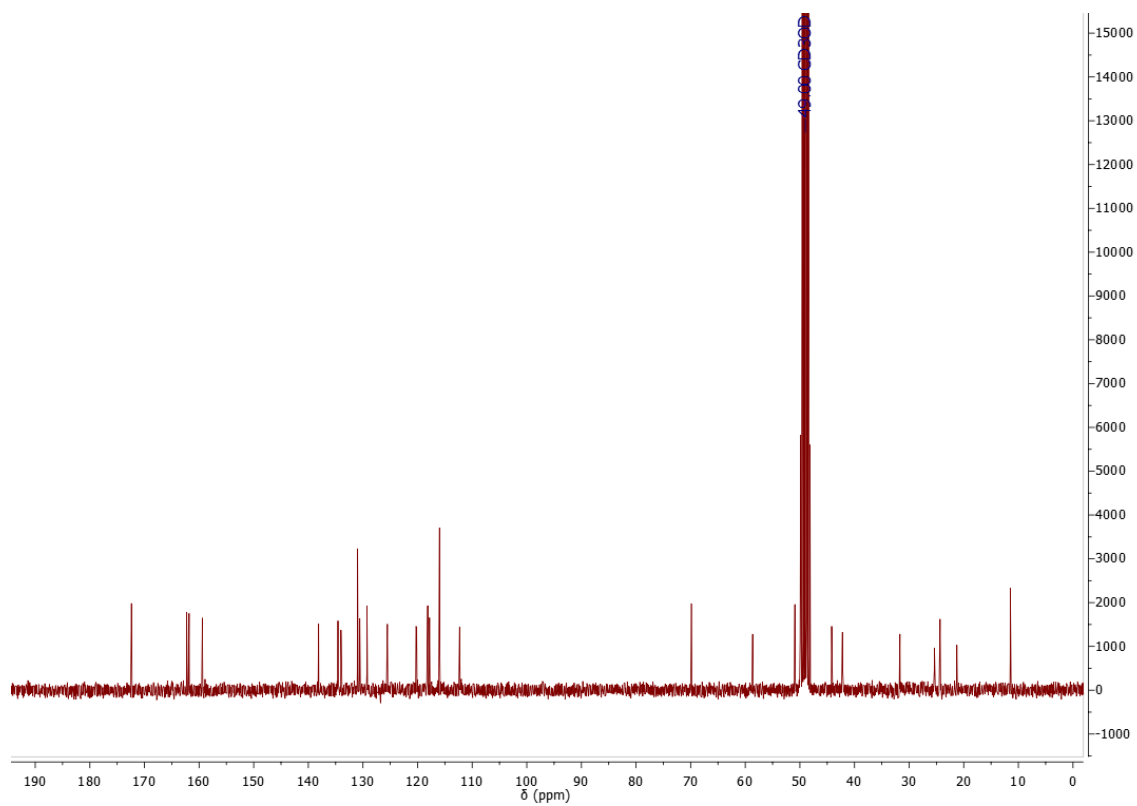

**Figure S33.** <sup>13</sup>C NMR spectrum of compound **15** (75 MHz, MeOD).

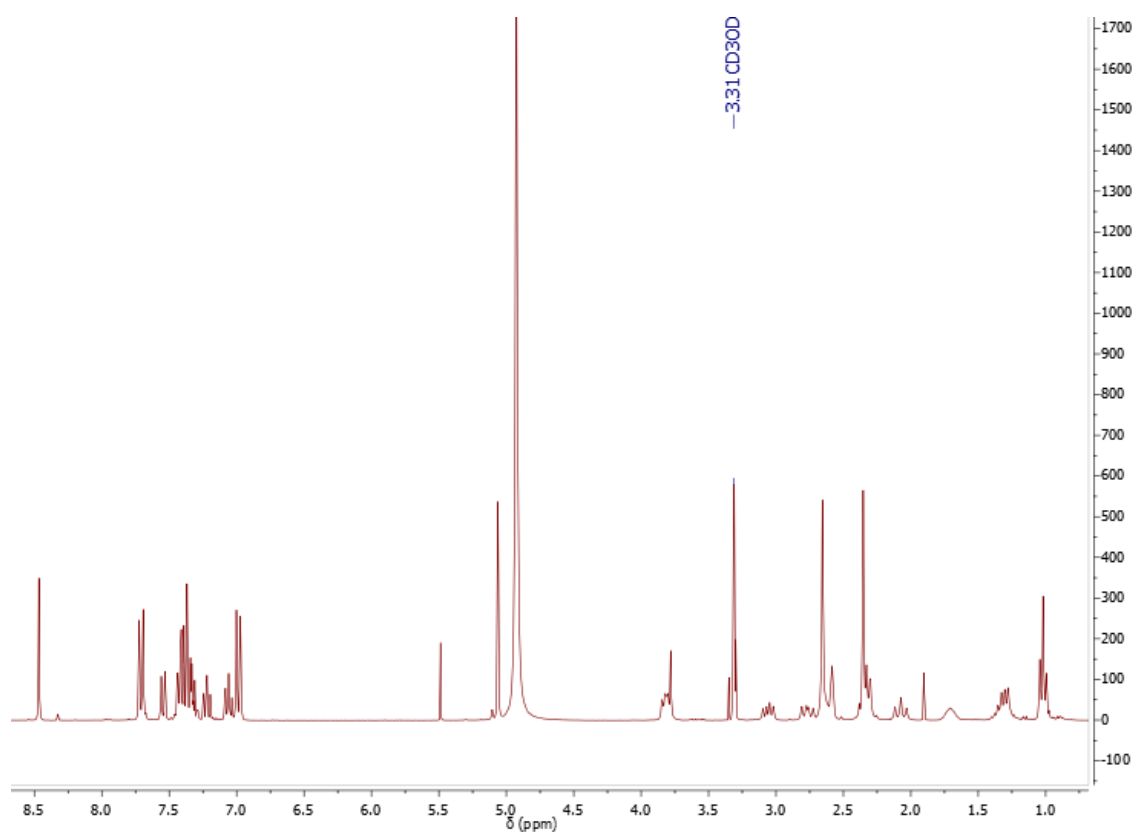

**Figure S34.**  $^1\text{H}$  NMR spectrum of compound **16** (300 MHz, MeOD).

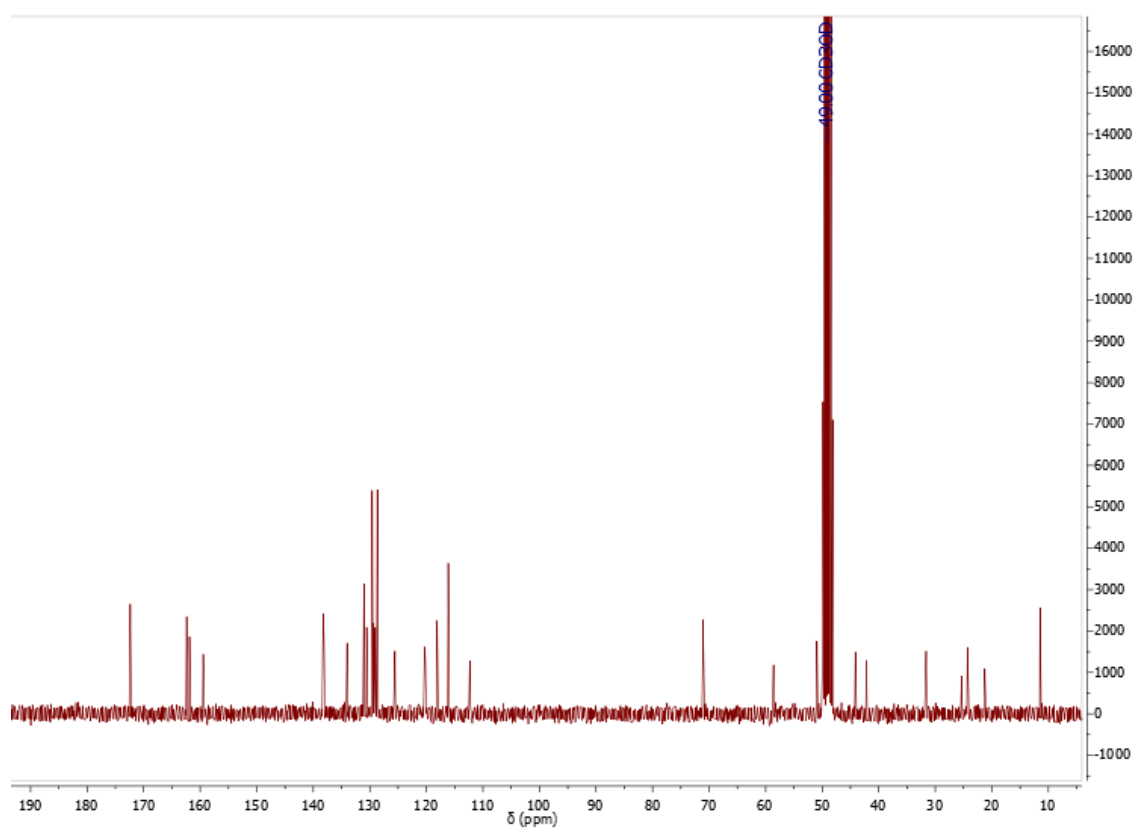

**Figure S35.**  $^{13}\text{C}$  NMR spectrum of compound **16** (75 MHz, MeOD).

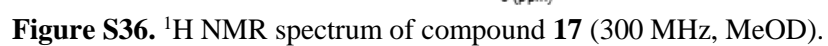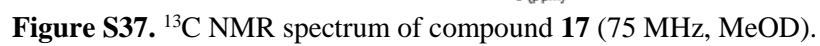

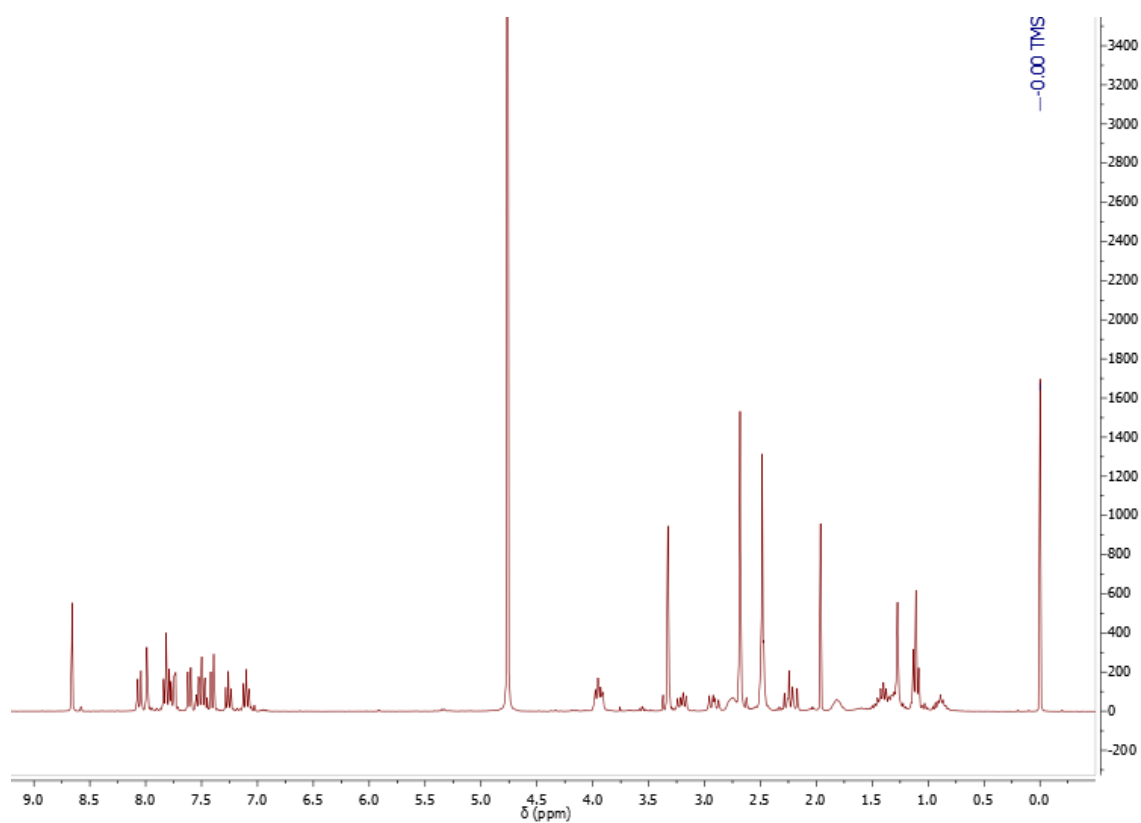

**Figure S38.**  $^1\text{H}$  NMR spectrum of compound **18** (300 MHz, MeOD +  $\text{CDCl}_3$ ).

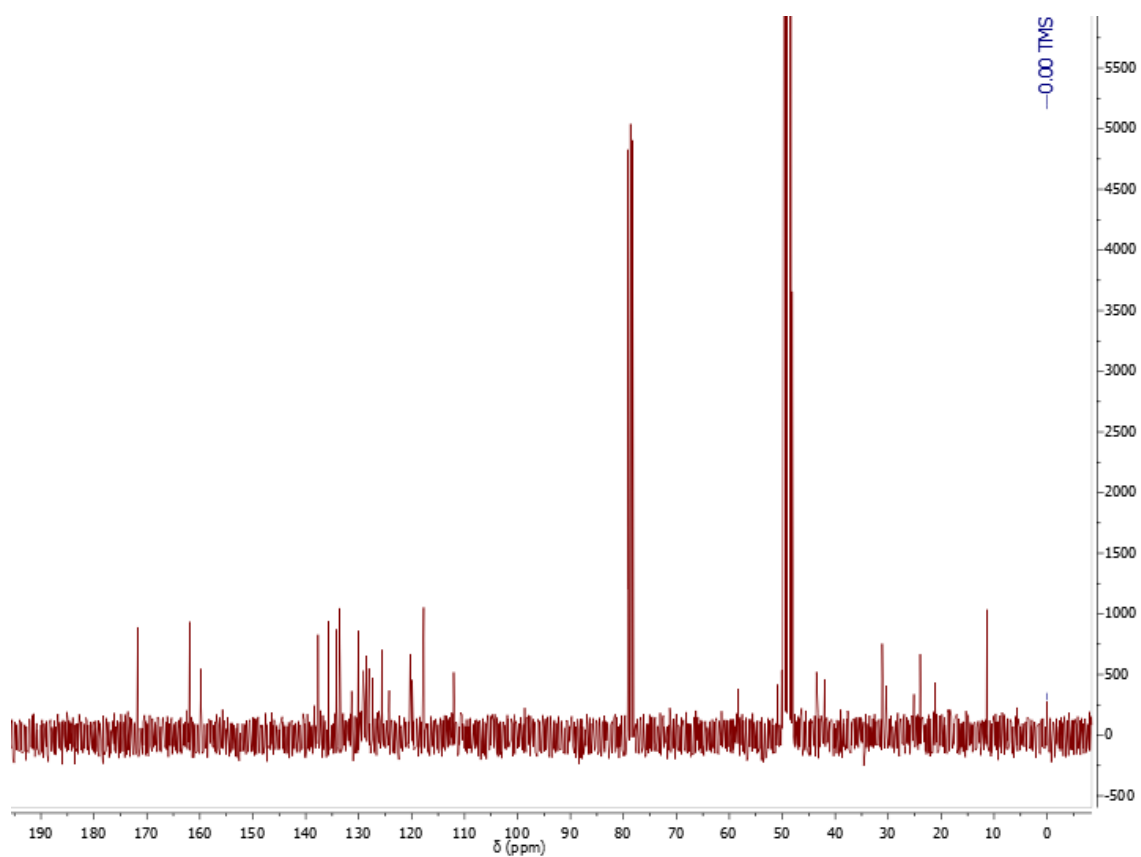

**Figure S39.**  $^{13}\text{C}$  NMR spectrum of compound **18** (75 MHz, MeOD +  $\text{CDCl}_3$ ).

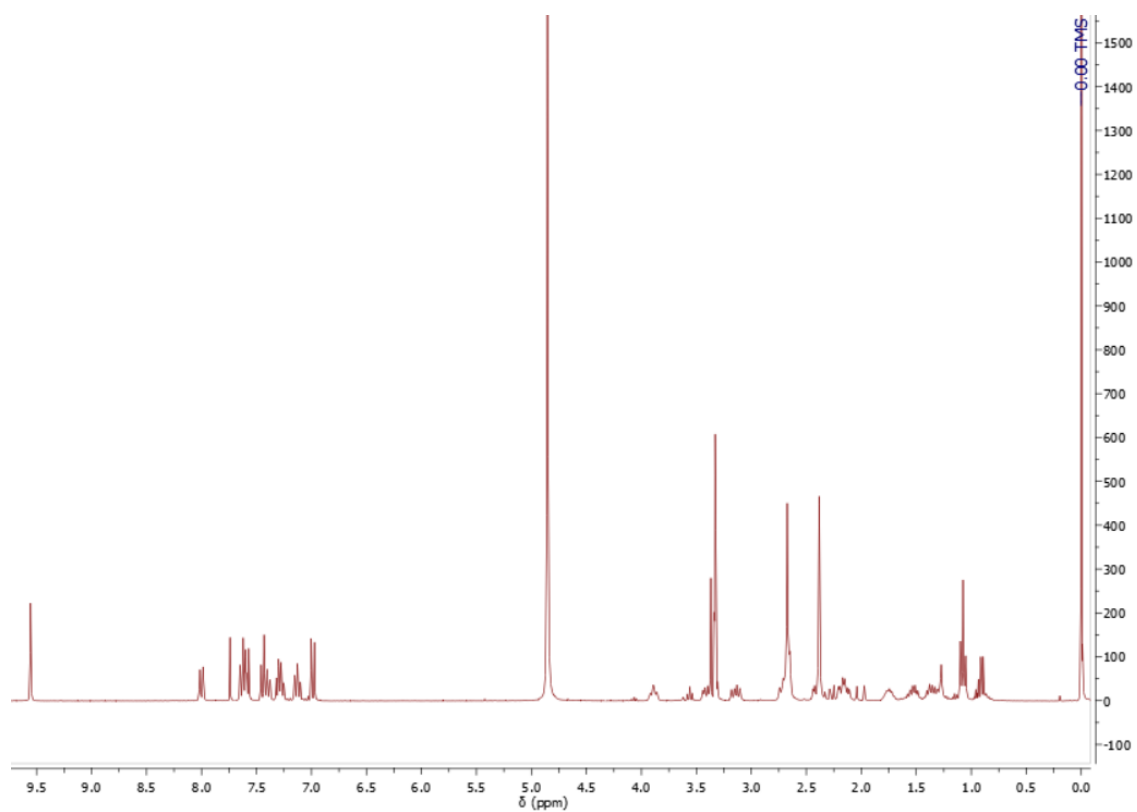

**Figure S40.**  $^1\text{H}$  NMR spectrum of compound **19** (300 MHz,  $\text{CDCl}_3 + \text{MeOD}$ ).

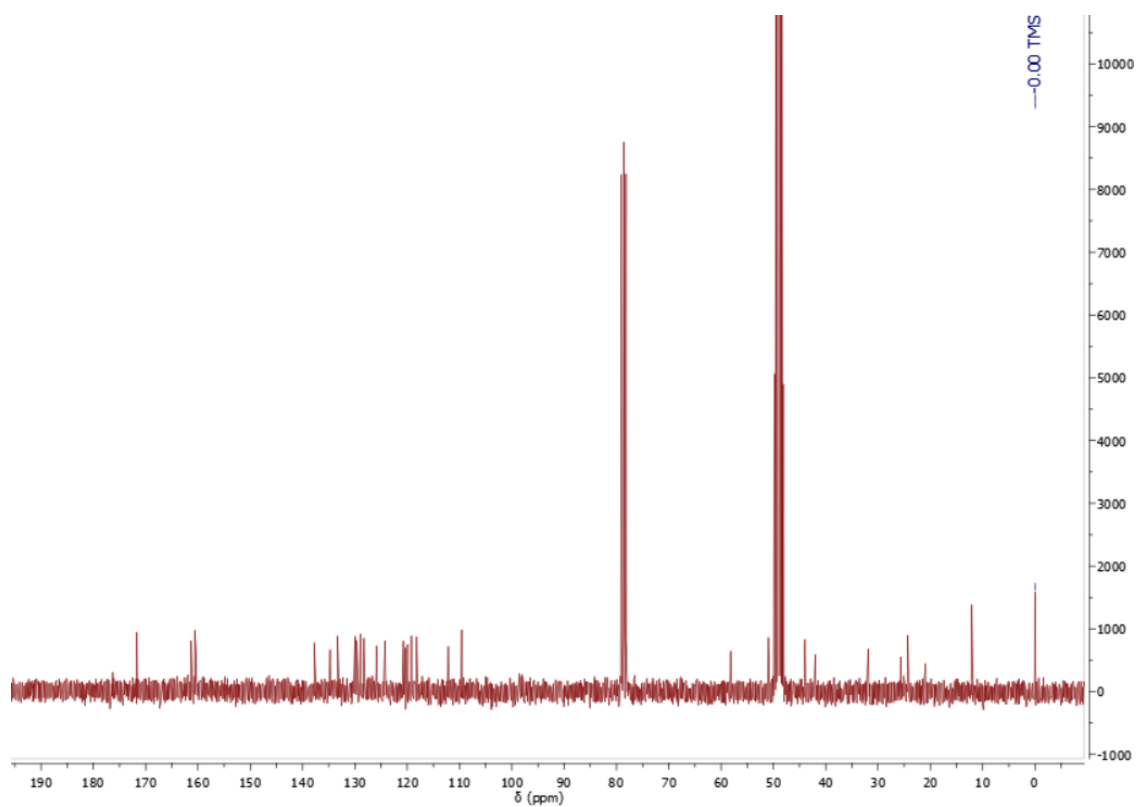

**Figure S41.**  $^{13}\text{C}$  NMR spectrum of compound **19** (75 MHz,  $\text{CDCl}_3 + \text{MeOD}$ ).

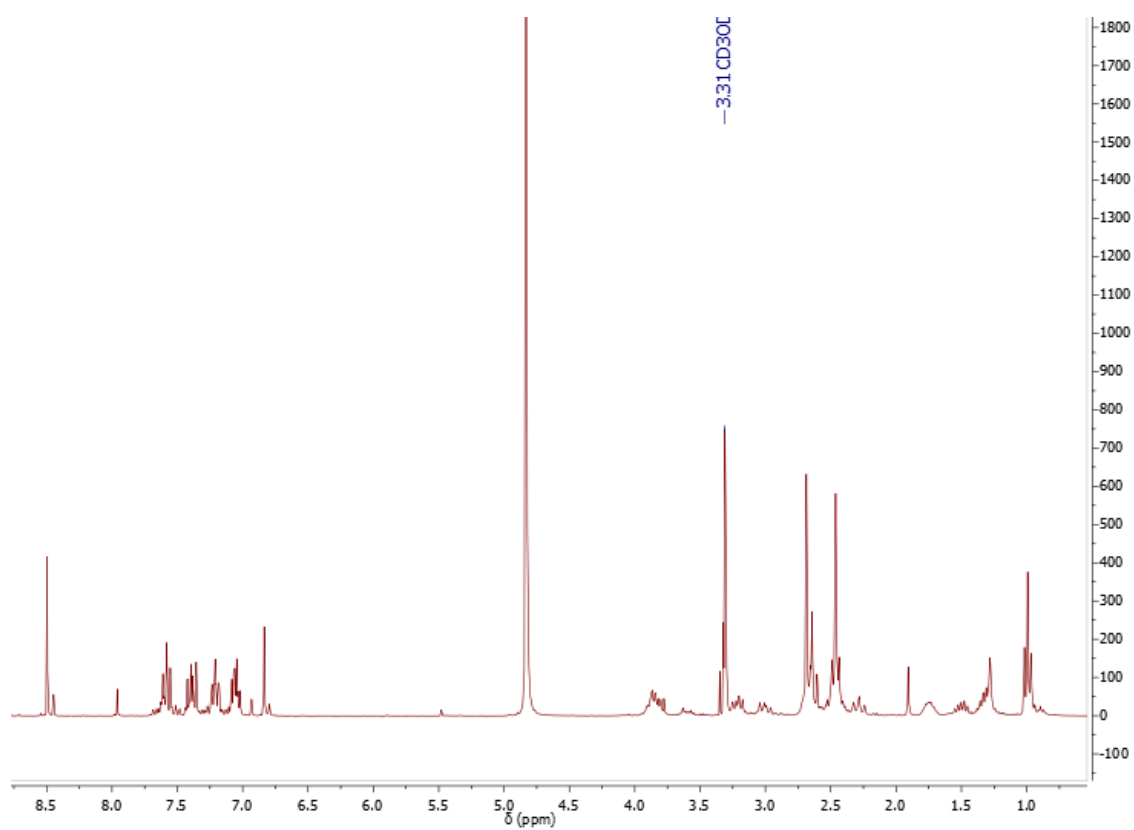

**Figure S42.** <sup>1</sup>H NMR spectrum of compound **20** (300 MHz, MeOD).

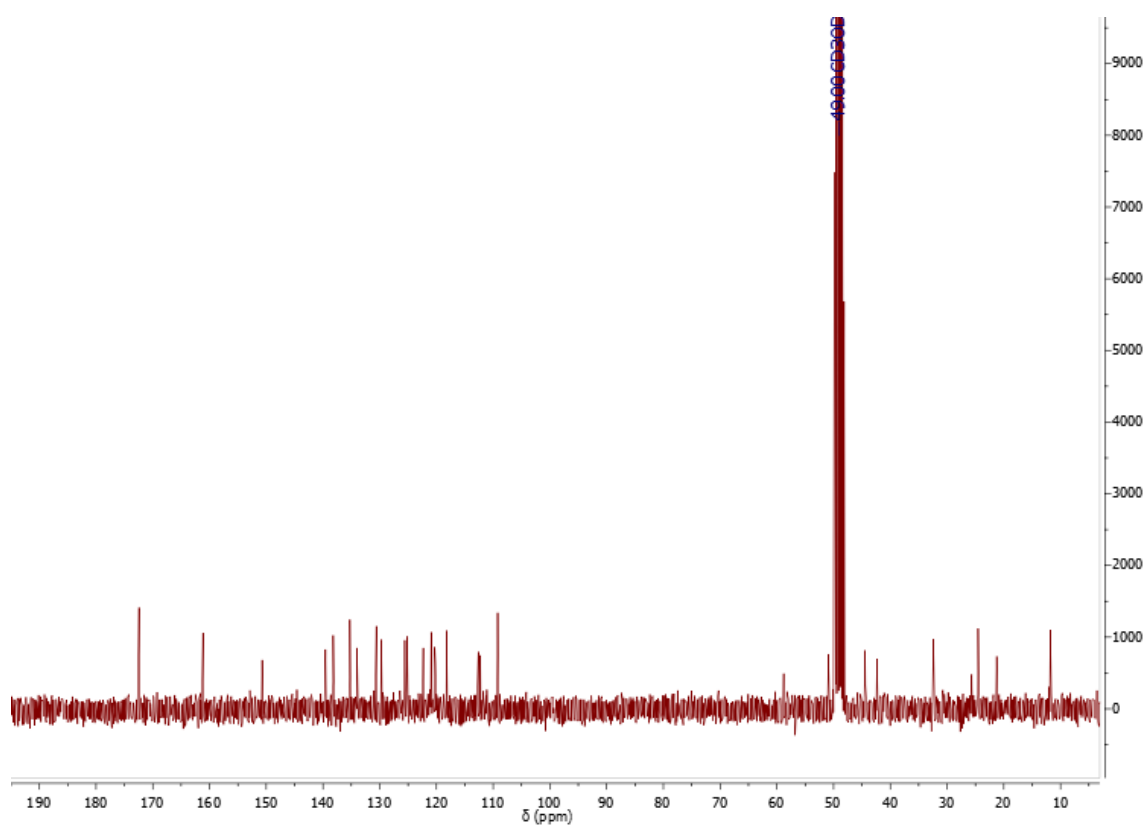

**Figure S43.** <sup>13</sup>C NMR spectrum of compound **20** (75 MHz, MeOD).



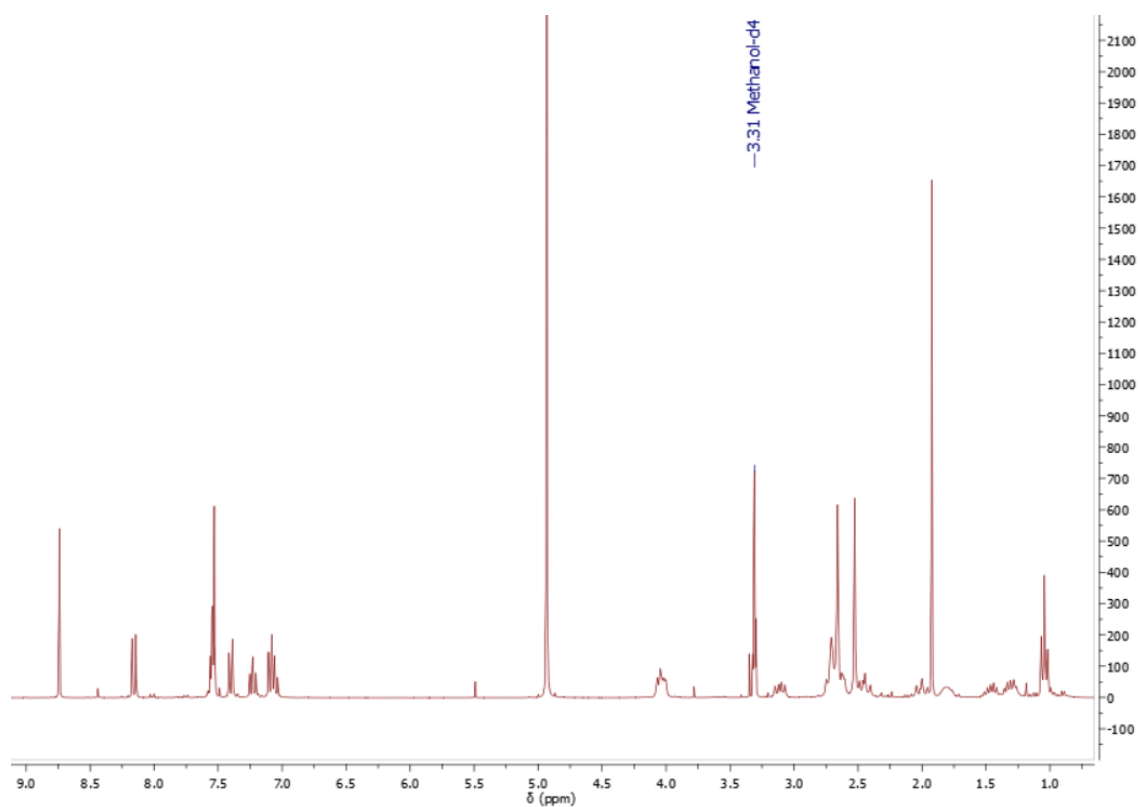

**Figure S44.** <sup>1</sup>H NMR spectrum of compound **21** (300 MHz, MeOD).

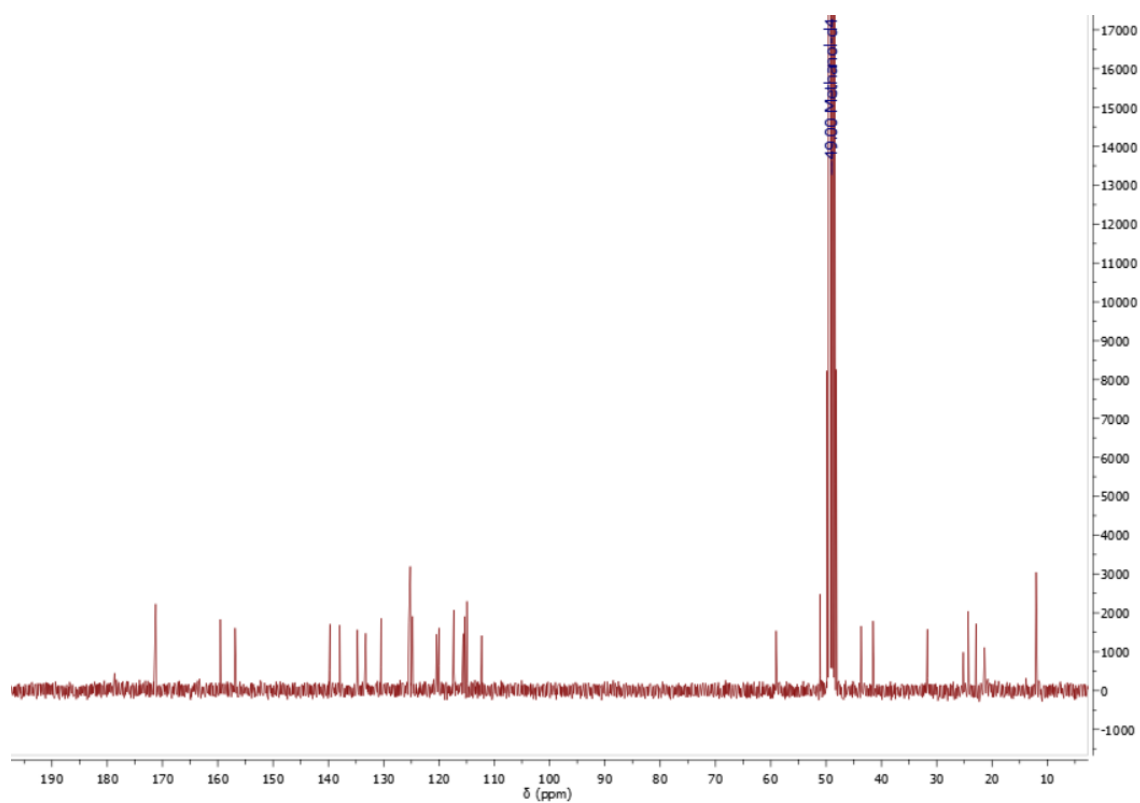

**Figure S45.** <sup>13</sup>C NMR spectrum of compound **21** (75 MHz, MeOD).

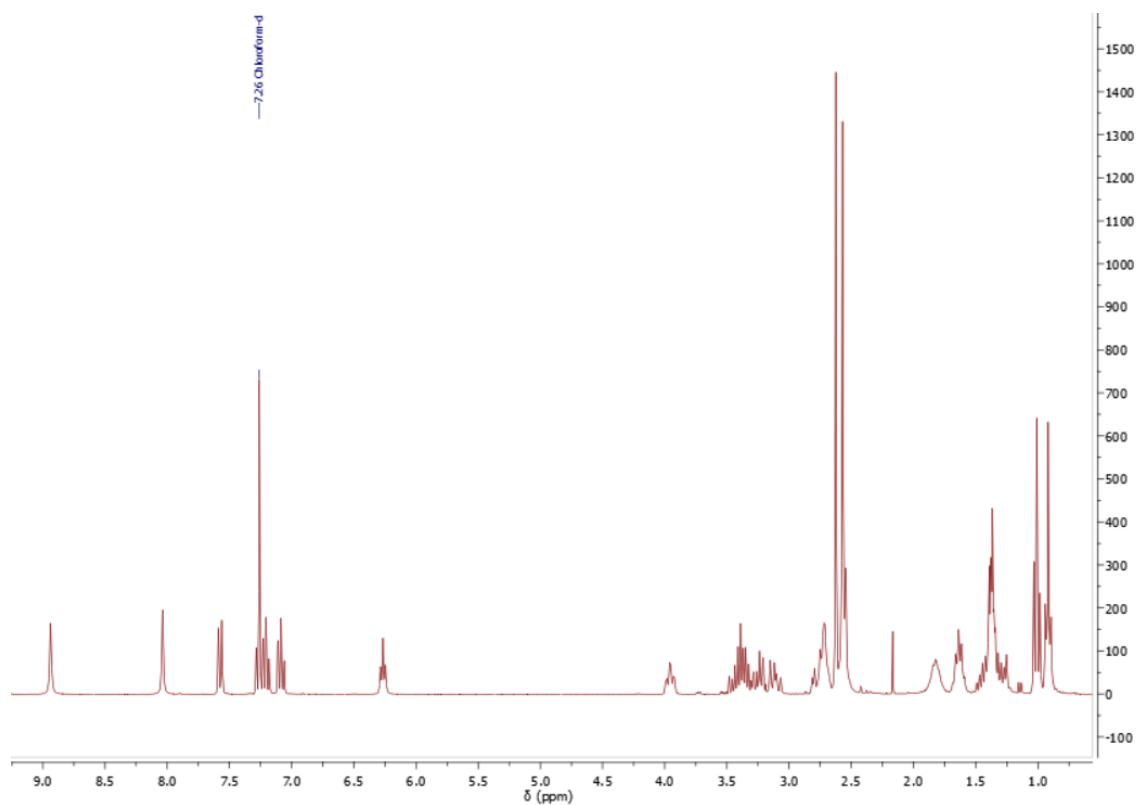

**Figure S46.** <sup>1</sup>H NMR spectrum of compound **22** (300 MHz, CDCl<sub>3</sub>).

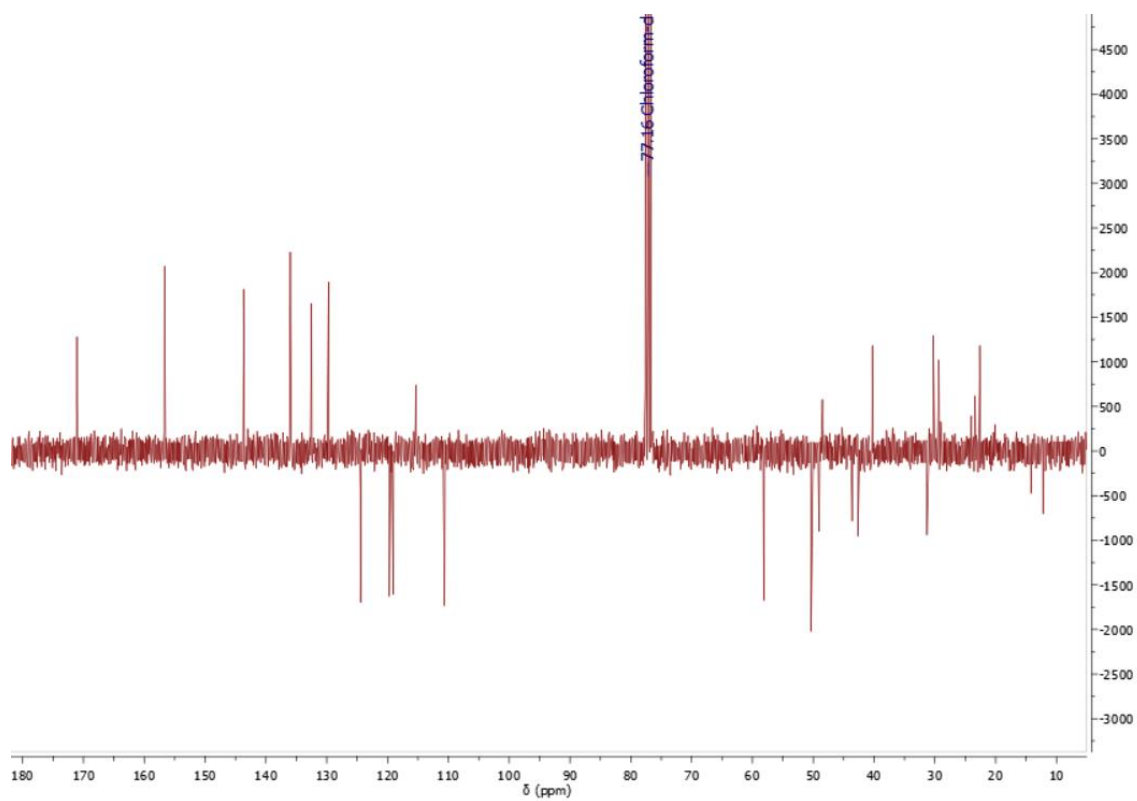

**Figure S47.** <sup>13</sup>C (APT) NMR spectrum of compound **22** (75 MHz, CDCl<sub>3</sub>).

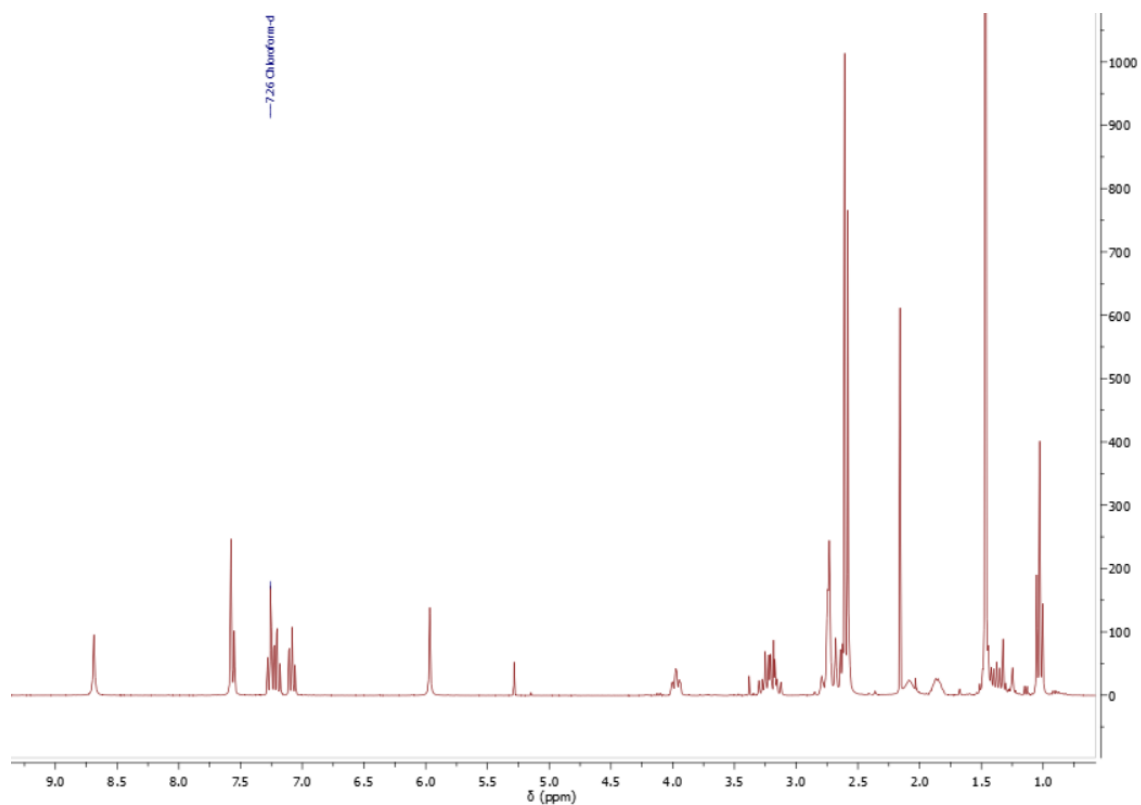

**Figure S48.**  $^1\text{H}$  NMR spectrum of compound **23** (300 MHz,  $\text{CDCl}_3$ ).

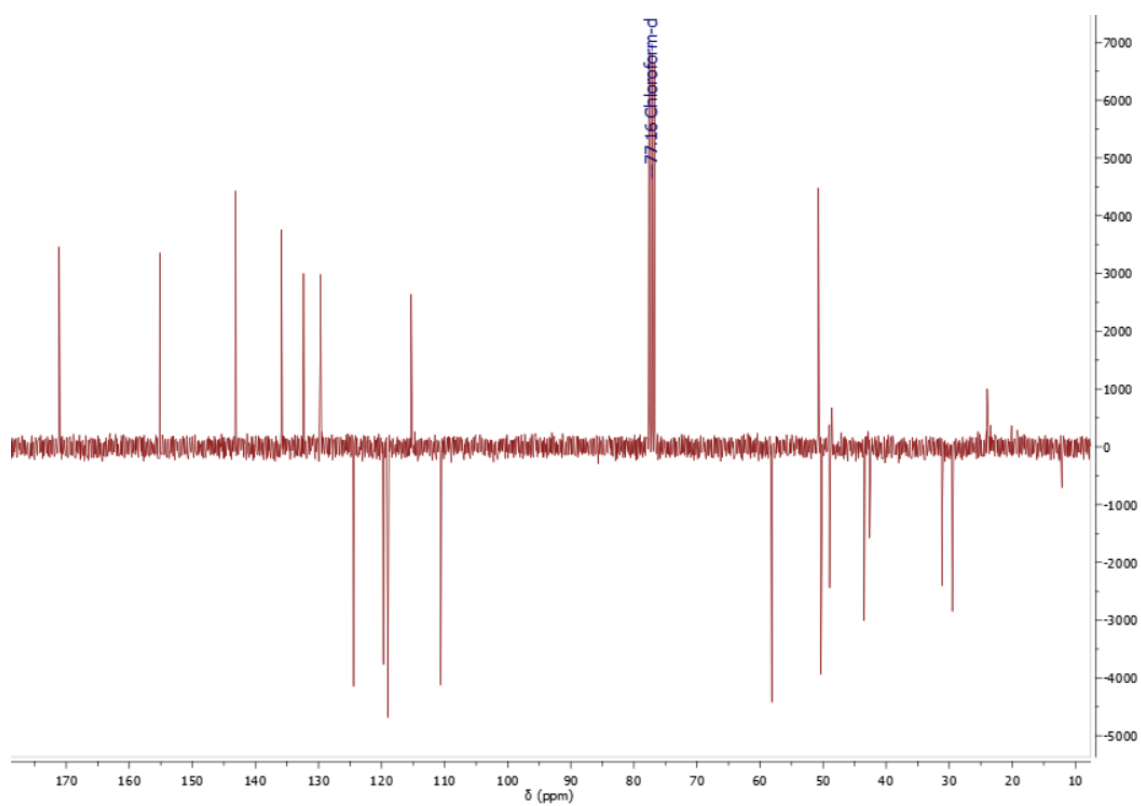

**Figure S49.**  $^{13}\text{C}$  (APT) NMR spectrum of compound **23** (75 MHz,  $\text{CDCl}_3$ ).

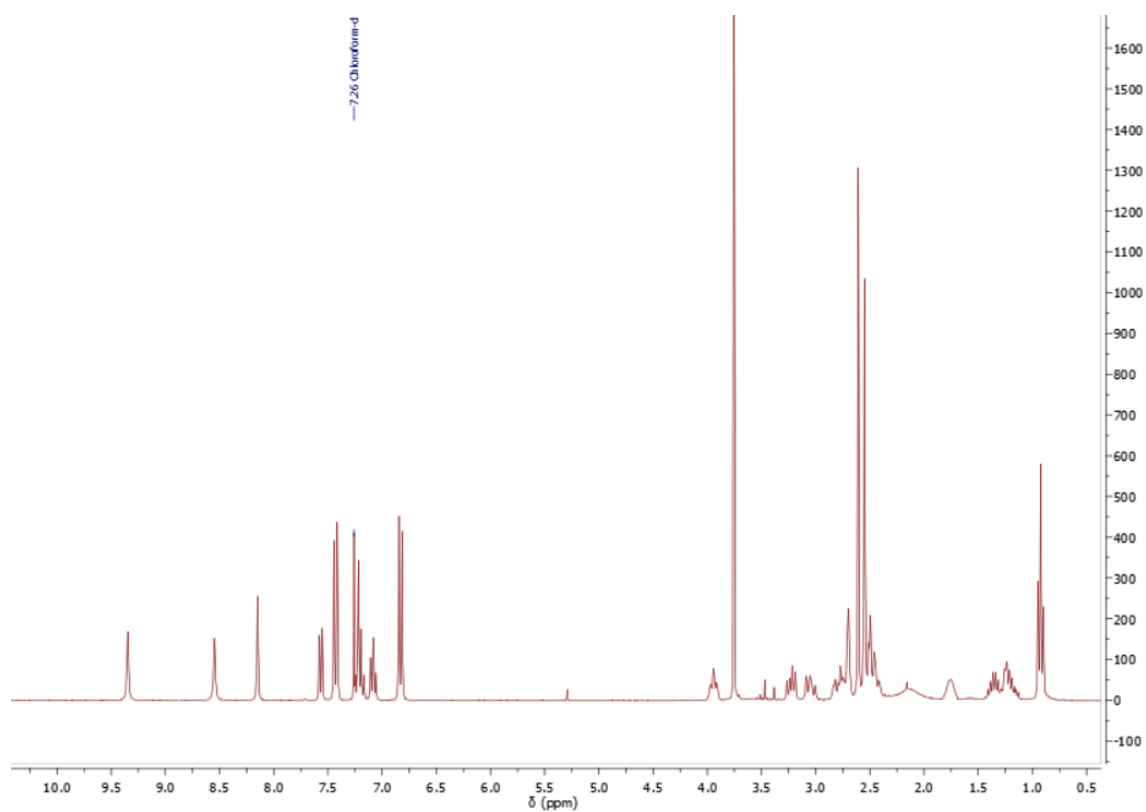

**Figure S50.** <sup>1</sup>H NMR spectrum of compound **24** (300 MHz, CDCl<sub>3</sub>).

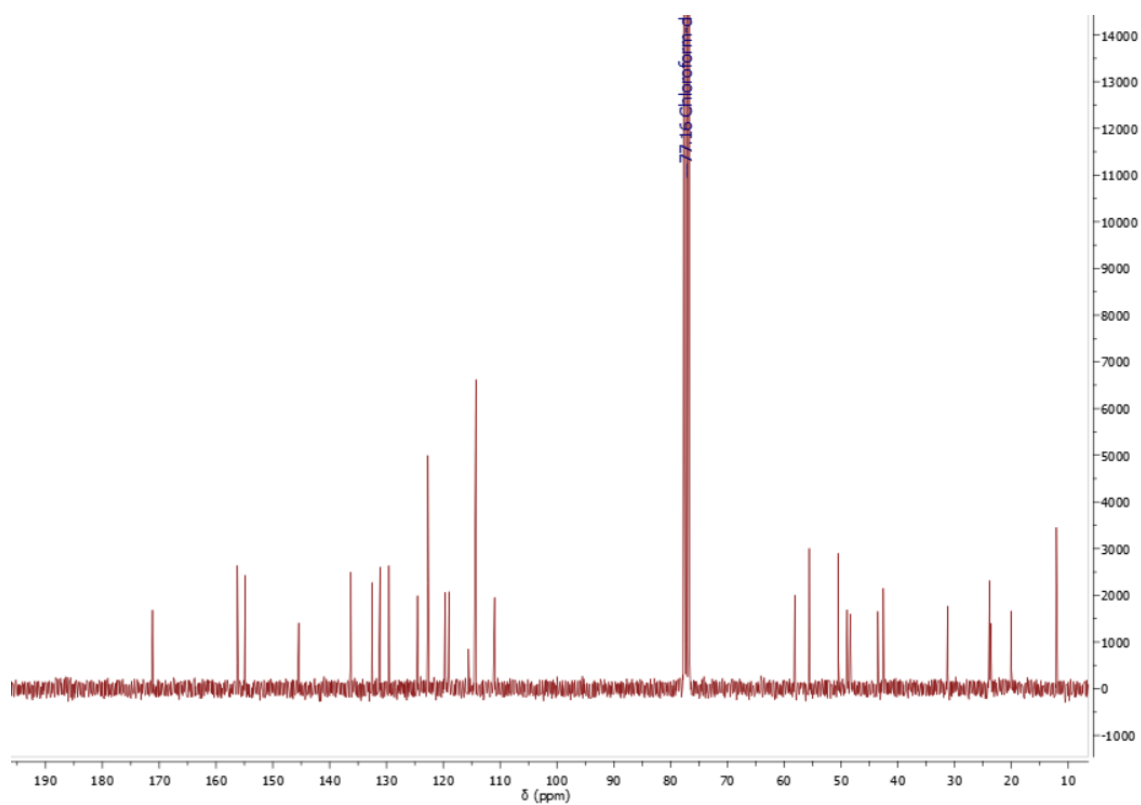

**Figure S51.** <sup>13</sup>C NMR spectrum of compound **24** (75 MHz, CDCl<sub>3</sub>).

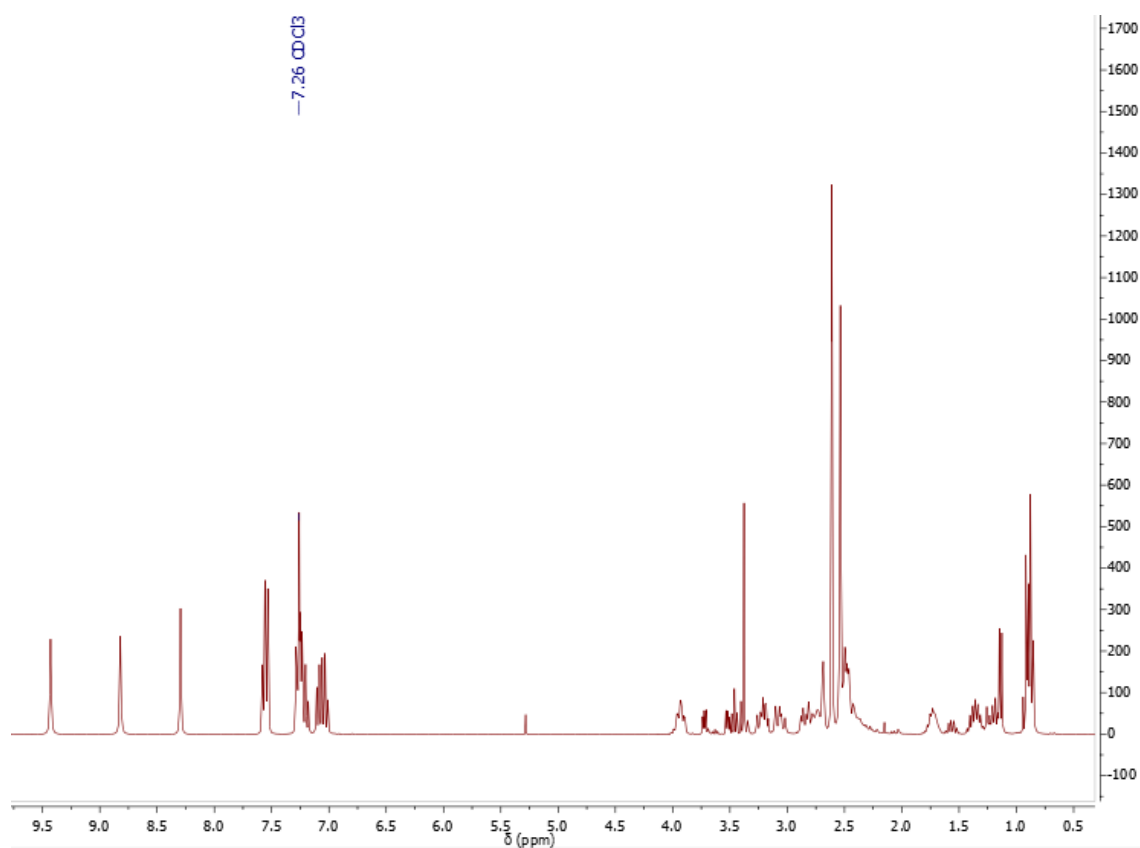

**Figure S52.**  $^1\text{H}$  NMR spectrum of compound **25** (300 MHz,  $\text{CDCl}_3$ ).

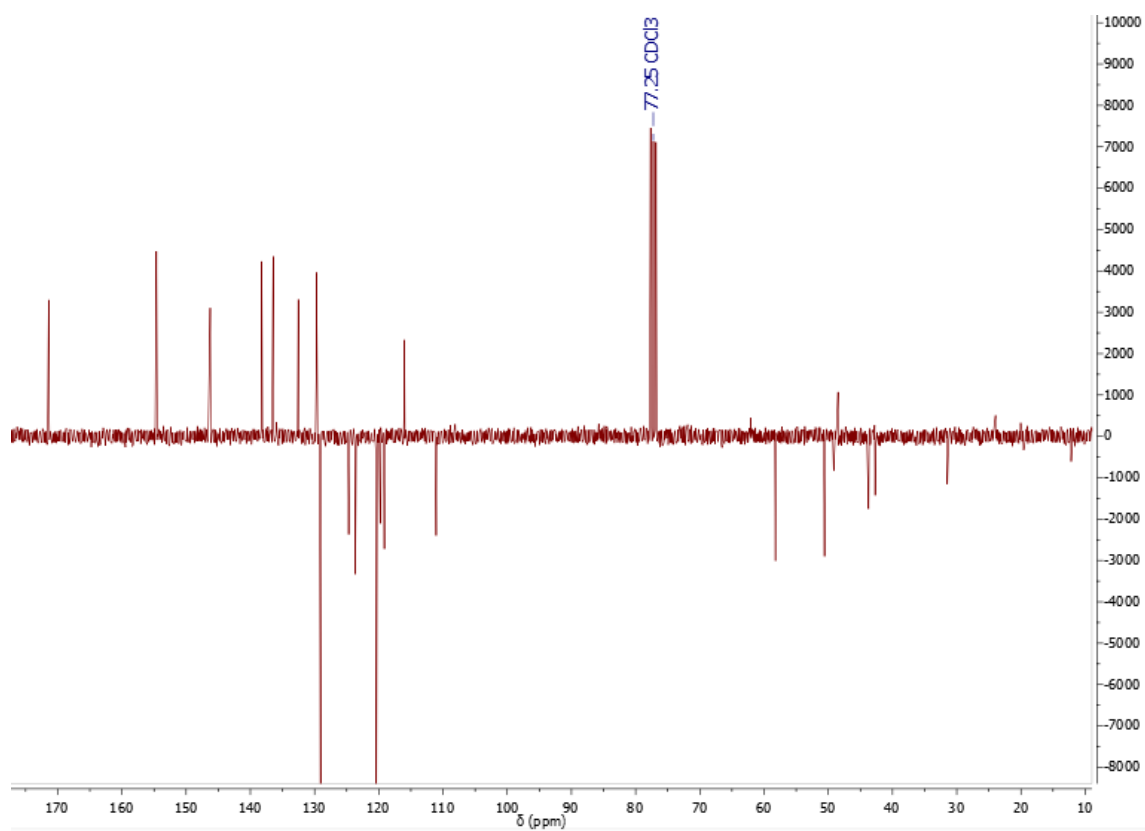

**Figure S53.**  $^{13}\text{C}$  (APT) NMR spectrum of compound **25** (75 MHz,  $\text{CDCl}_3$ ).

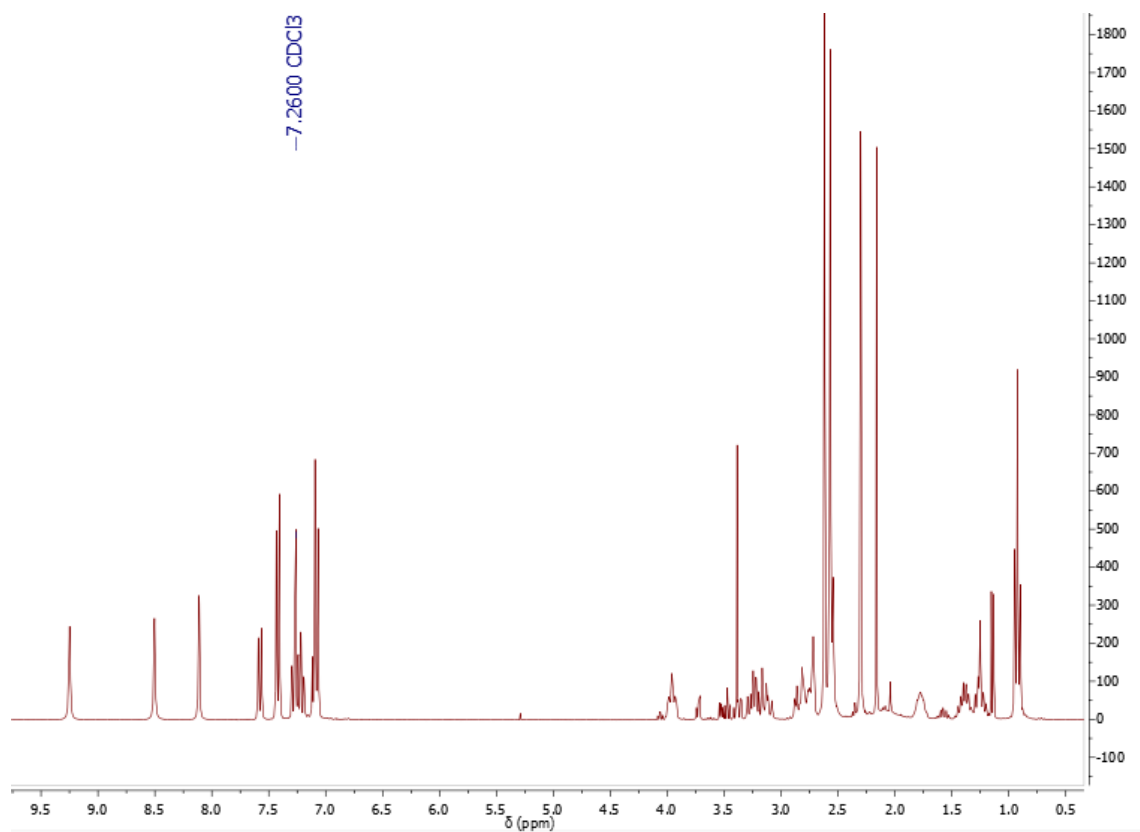

**Figure S54.** <sup>1</sup>H NMR spectrum of compound **26** (300 MHz, CDCl<sub>3</sub>).

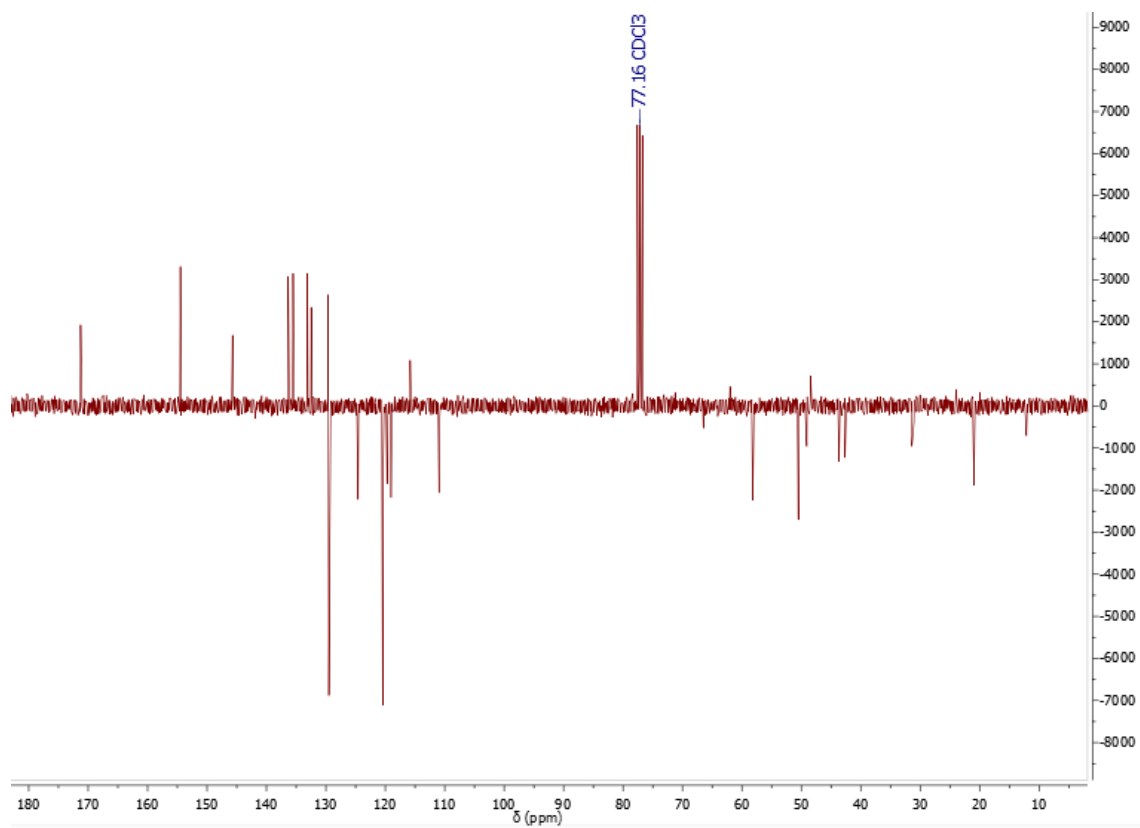

**Figure S55.** <sup>13</sup>C (APT) NMR spectrum of compound **26** (75 MHz, CDCl<sub>3</sub>).

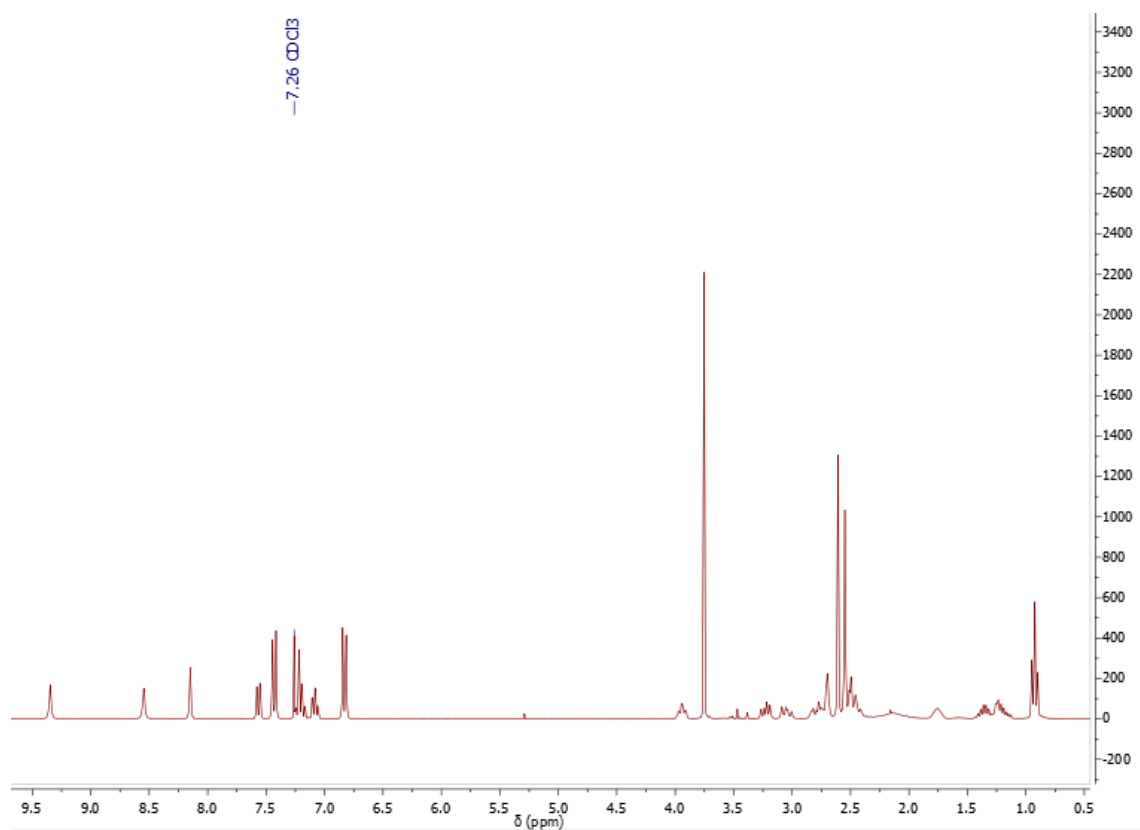

**Figure S56.** <sup>1</sup>H NMR spectrum of compound **27** (300 MHz, CDCl<sub>3</sub>).

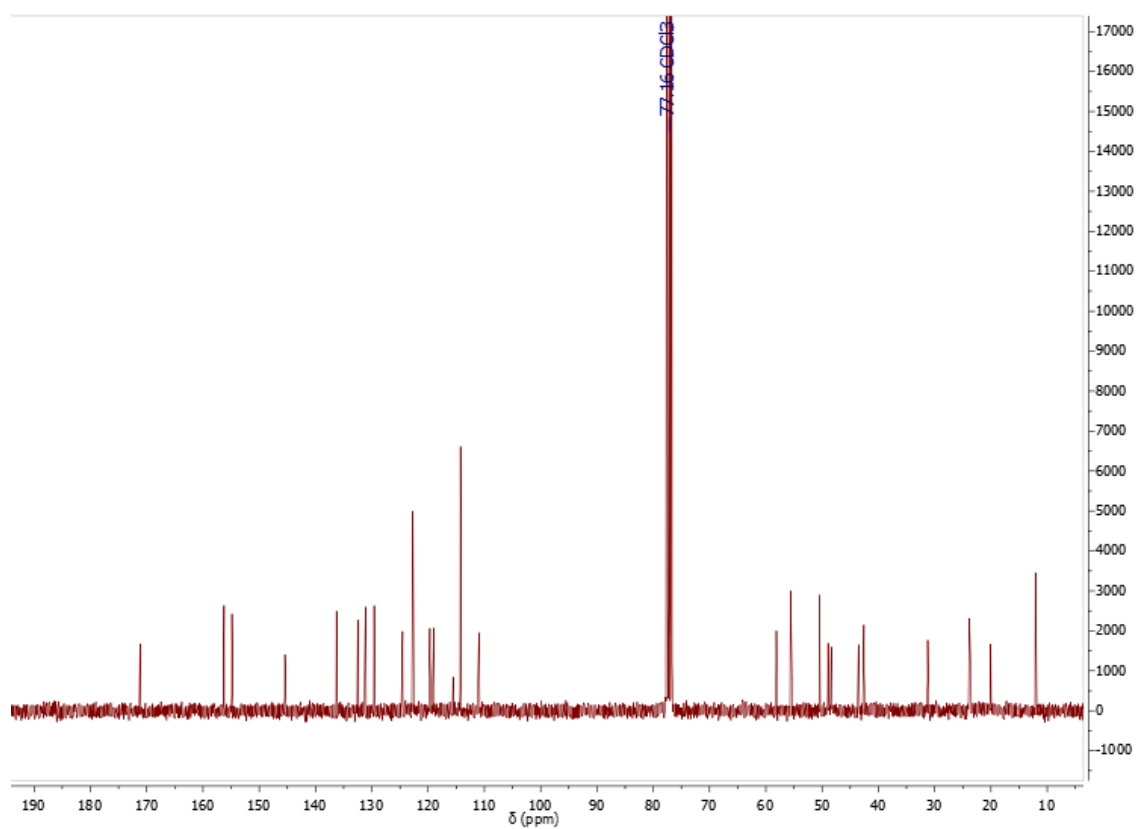

**Figure S57.** <sup>13</sup>C NMR spectrum of compound **27** (75 MHz, CDCl<sub>3</sub>).

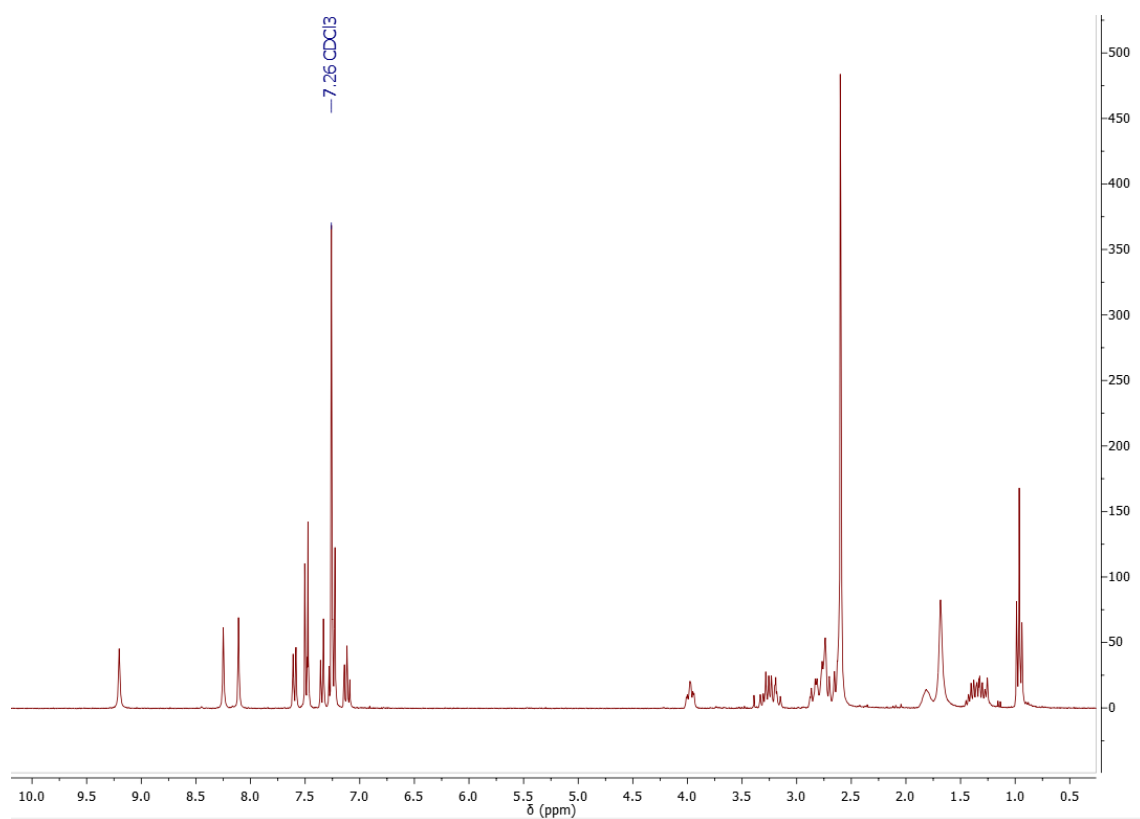

**Figure S58.** <sup>1</sup>H NMR spectrum of compound **28** (300 MHz, CDCl<sub>3</sub>).

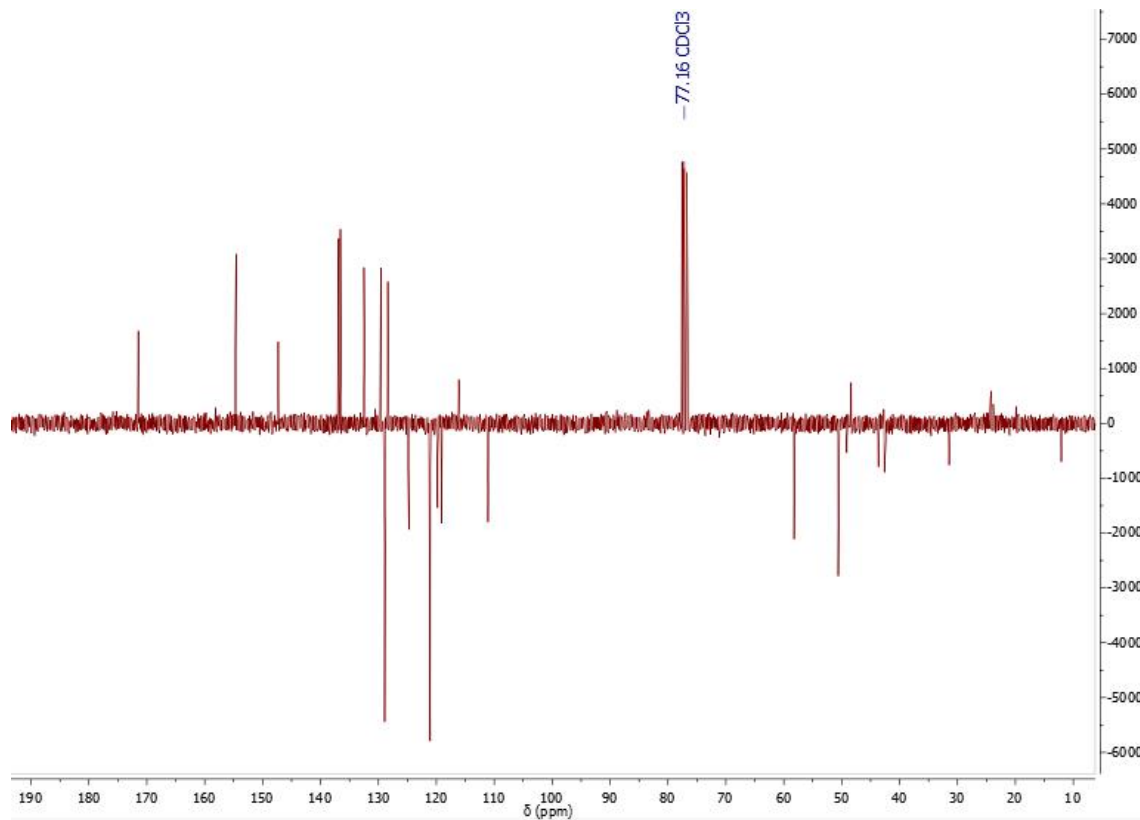

**Figure S59.** <sup>13</sup>C (APT) NMR spectrum of compound **28** (75 MHz, CDCl<sub>3</sub>).



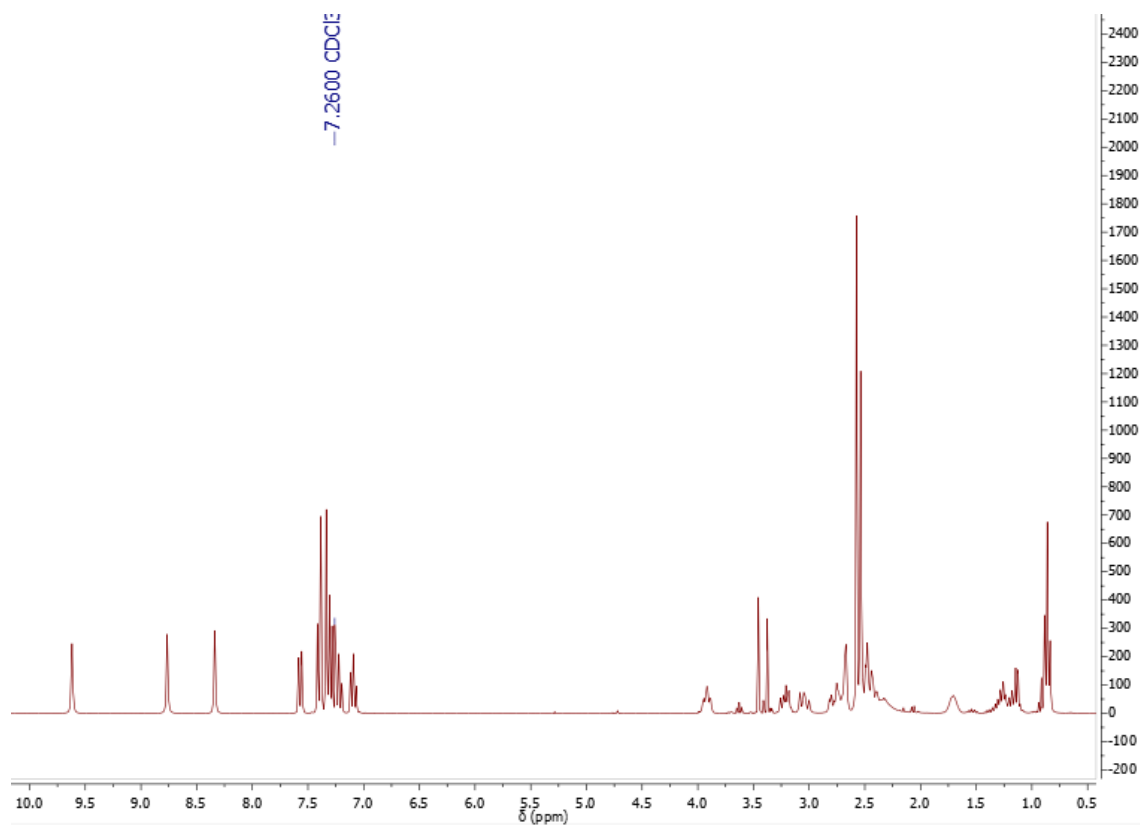

**Figure S60.** <sup>1</sup>H NMR spectrum of compound **29** (300 MHz, CDCl<sub>3</sub>).

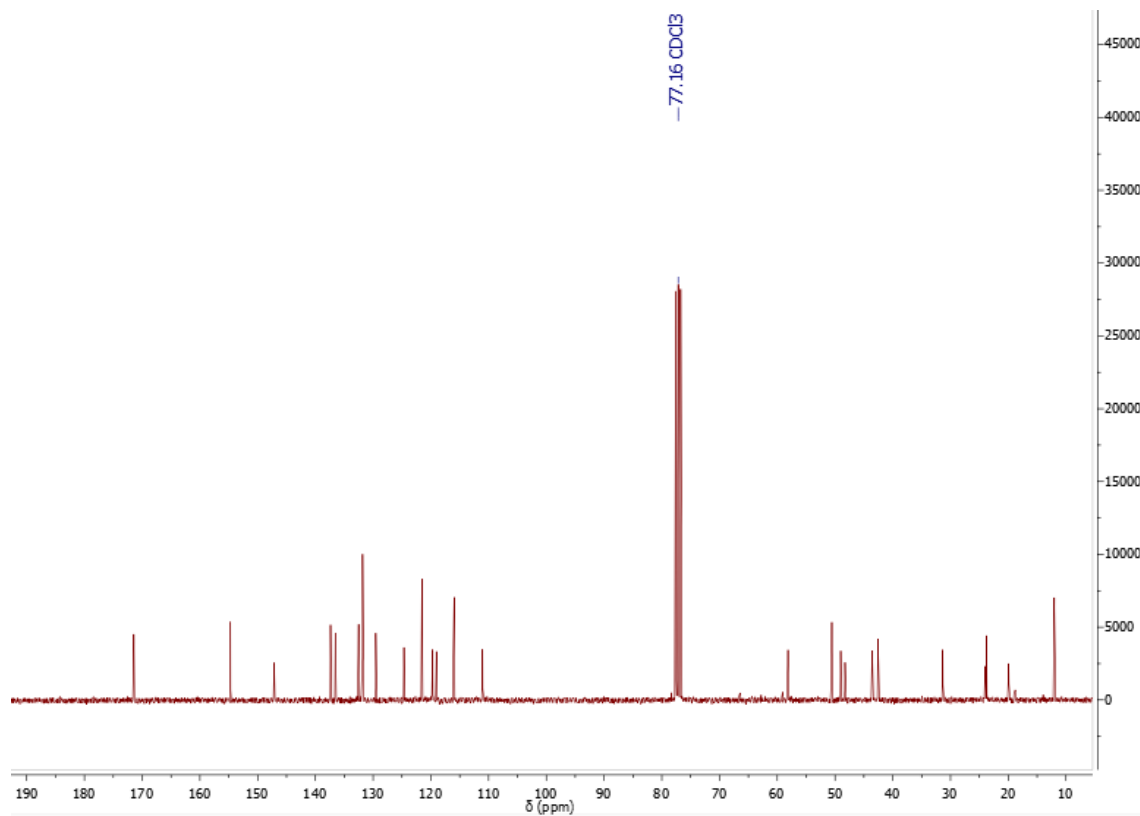

**Figure S61.** <sup>13</sup>C NMR spectrum of compound **29** (75 MHz, CDCl<sub>3</sub>).

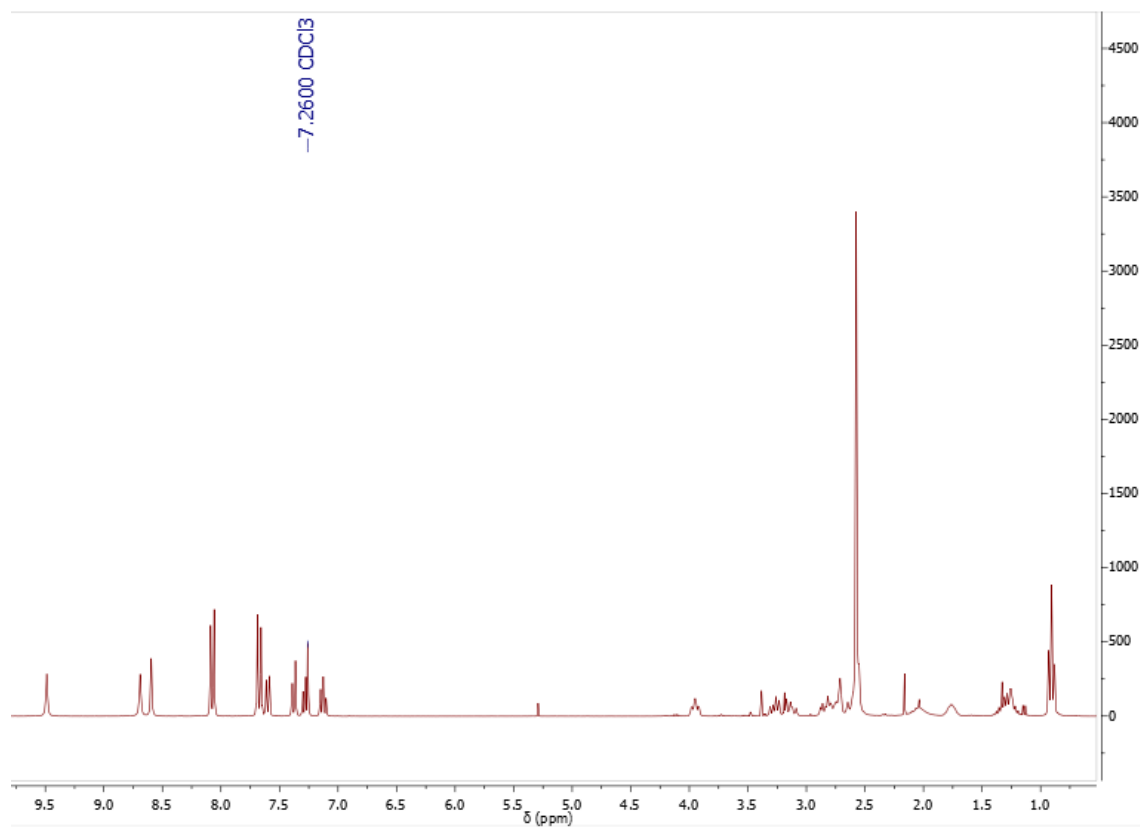

**Figure S62.**  $^1\text{H}$  NMR spectrum of compound **30** (300 MHz,  $\text{CDCl}_3$ ).

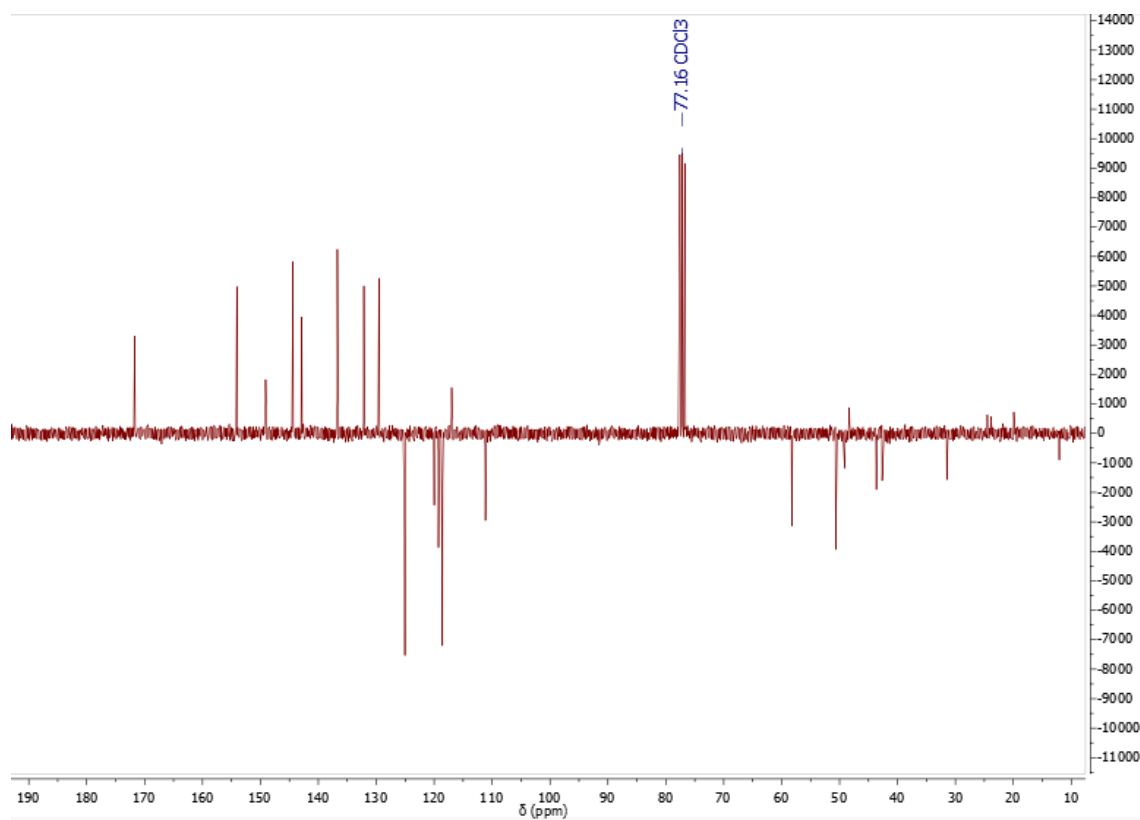

**Figure S63.**  $^{13}\text{C}$  (APT) NMR spectrum of compound **30** (75 MHz,  $\text{CDCl}_3$ ).

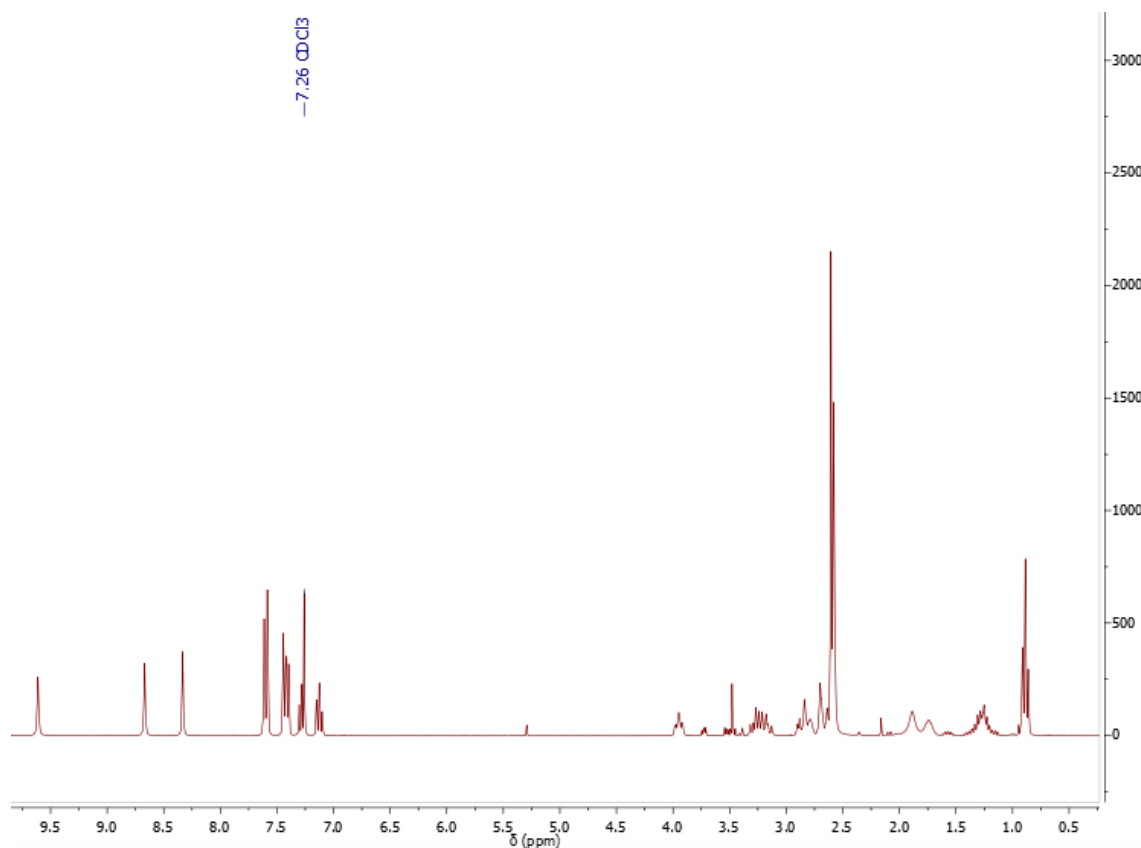

**Figure S64.** <sup>1</sup>H NMR spectrum of compound **31** (300 MHz, CDCl<sub>3</sub>).

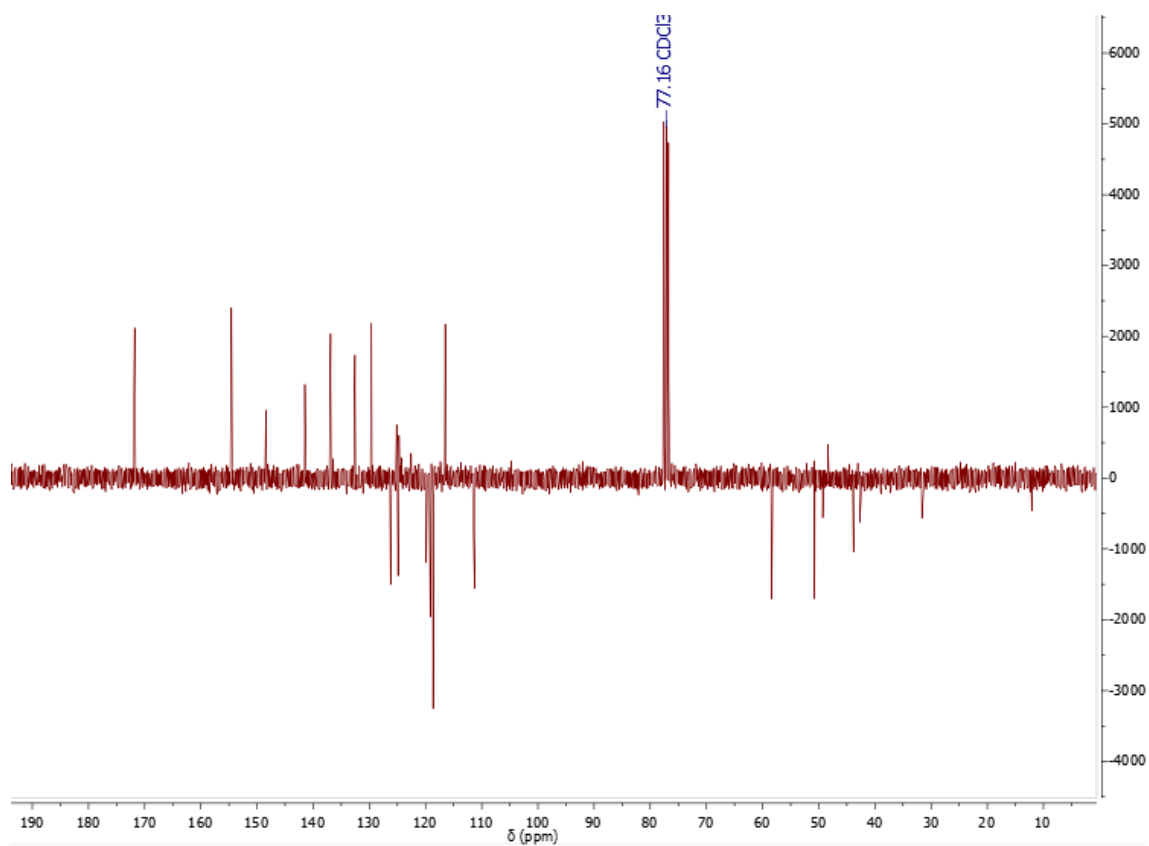

**Figure S65.** <sup>13</sup>C (APT) NMR spectrum of compound **31** (75 MHz, CDCl<sub>3</sub>).

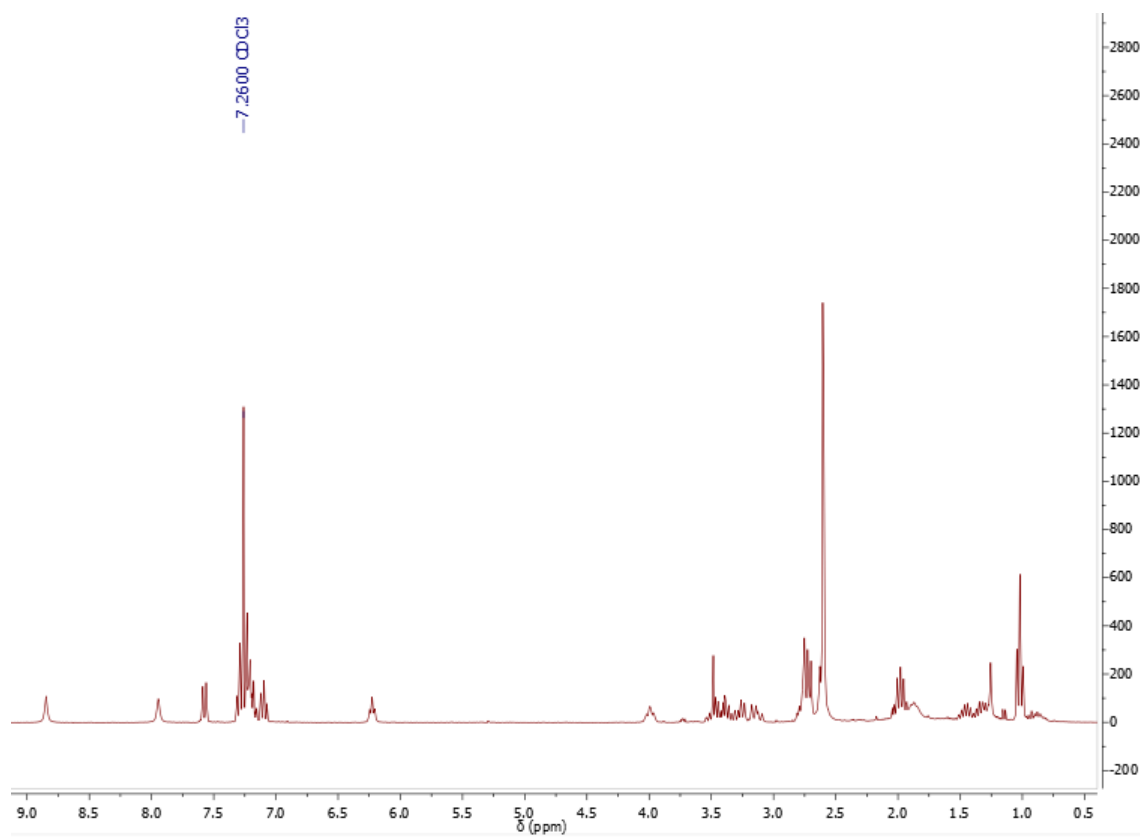

**Figure S66.**  $^1\text{H}$  NMR spectrum of compound **32** (300 MHz,  $\text{CDCl}_3$ ).

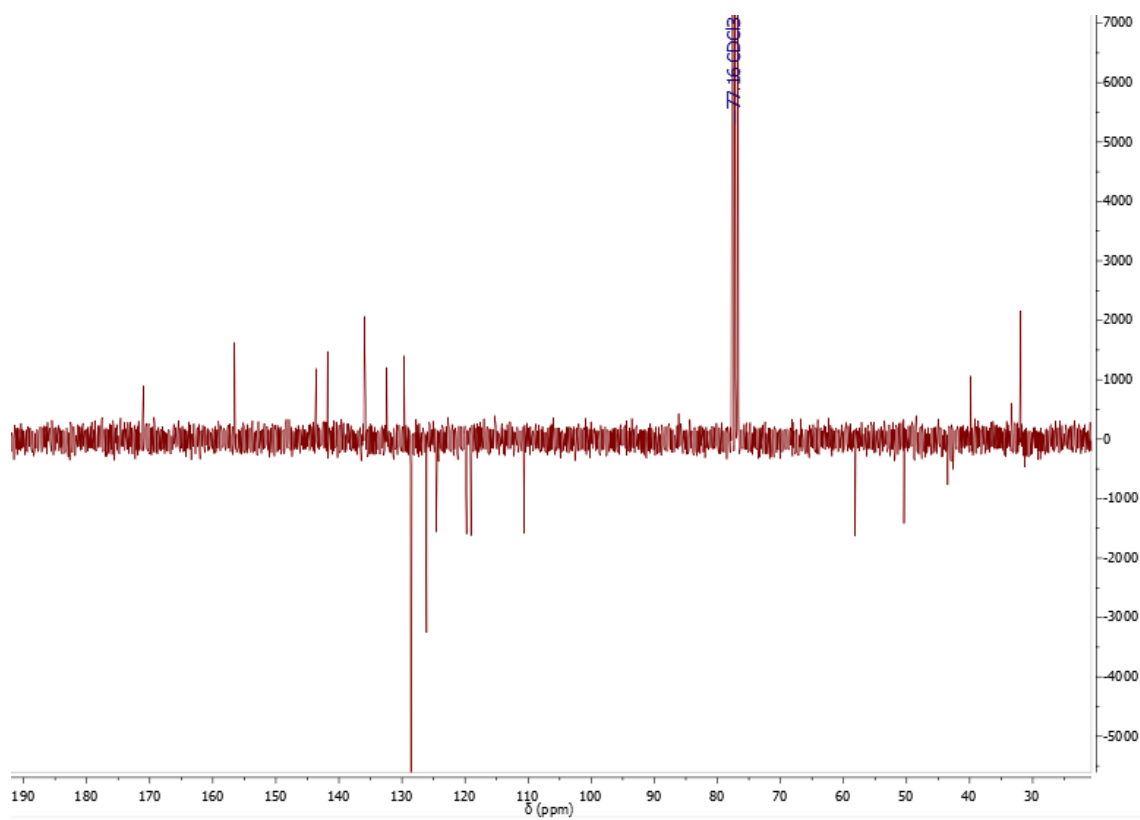

**Figure S67.**  $^{13}\text{C}$  (APT) NMR spectrum of compound **32** (75 MHz,  $\text{CDCl}_3$ ).

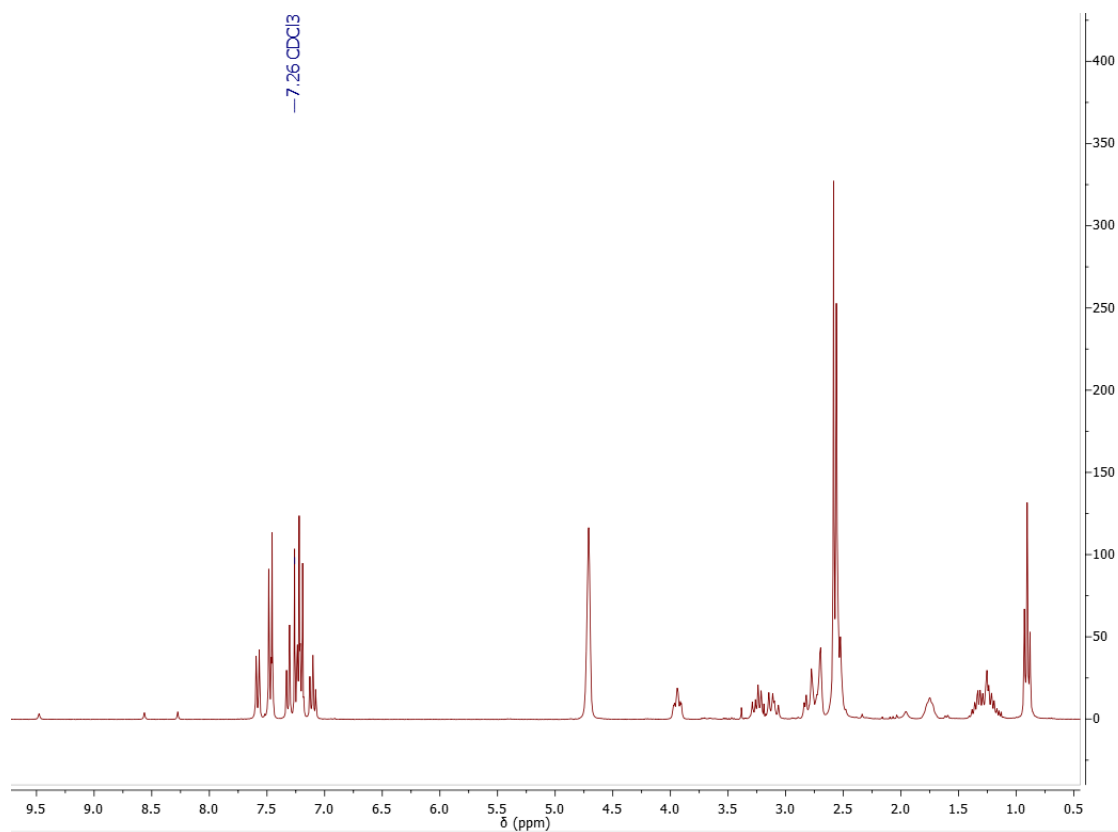

**Figure S68.**  $^1\text{H}$  NMR spectrum of compound **28** (300 MHz,  $\text{CDCl}_3 + \text{D}_2\text{O}$ ).

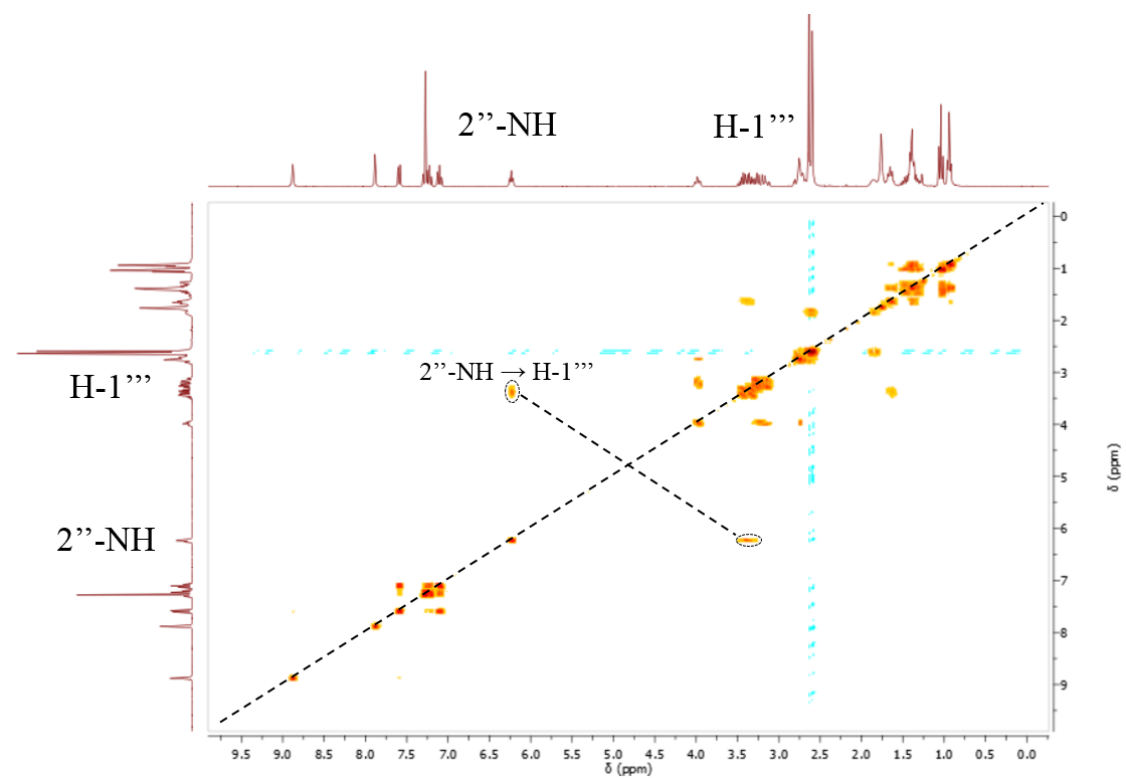

**Figure S69.** COSY spectrum of compound **22** (300 MHz,  $\text{CDCl}_3$ ).

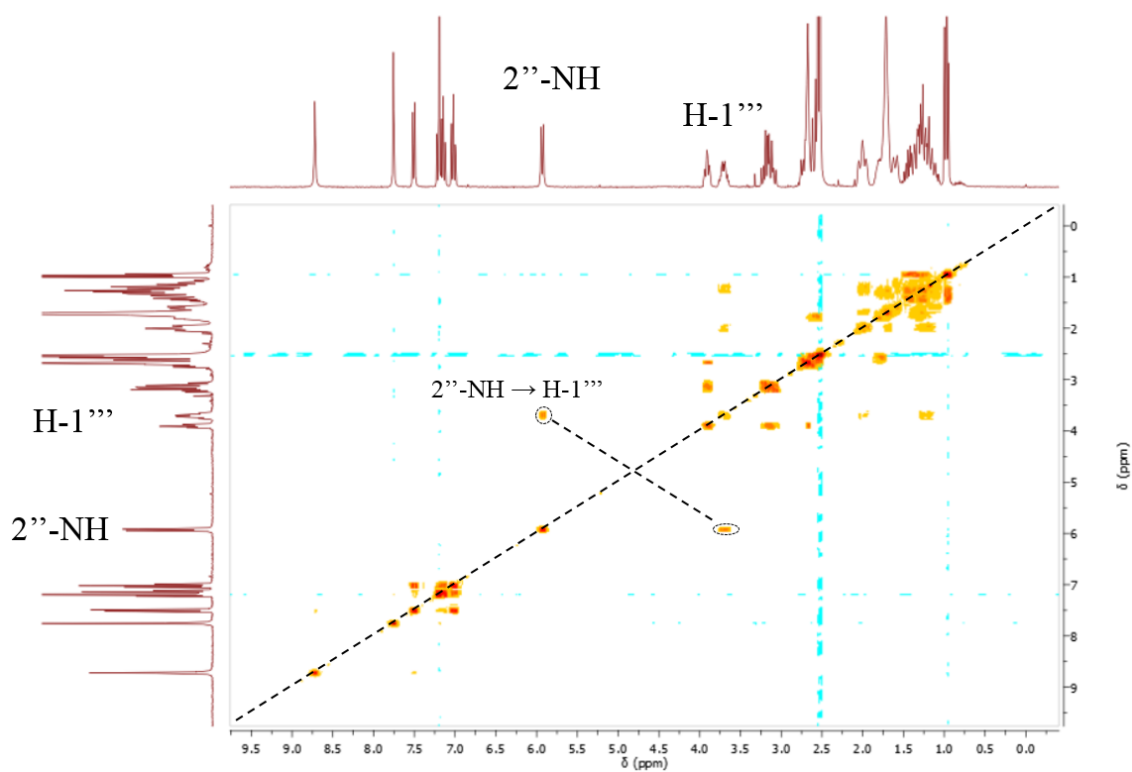

**Figure S70.** COSY spectrum of compound **24** (300 MHz,  $\text{CDCl}_3$ ).

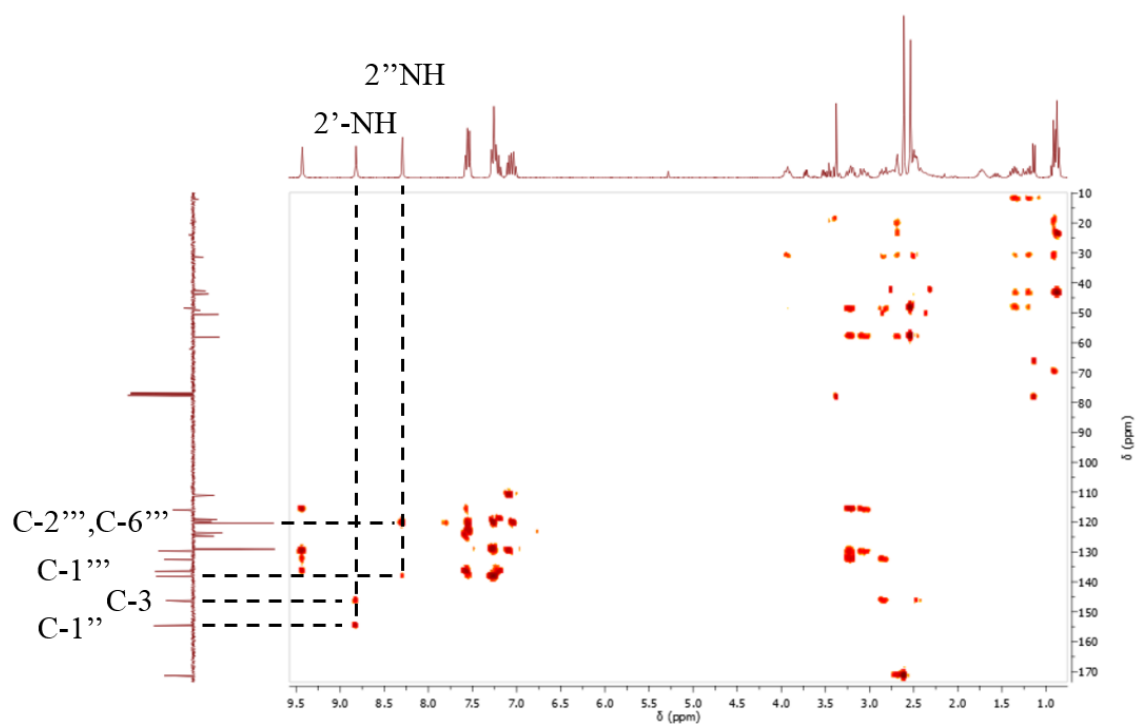

**Figure S71.** HMBC spectrum of compound **25** (300 MHz,  $\text{CDCl}_3$ ).

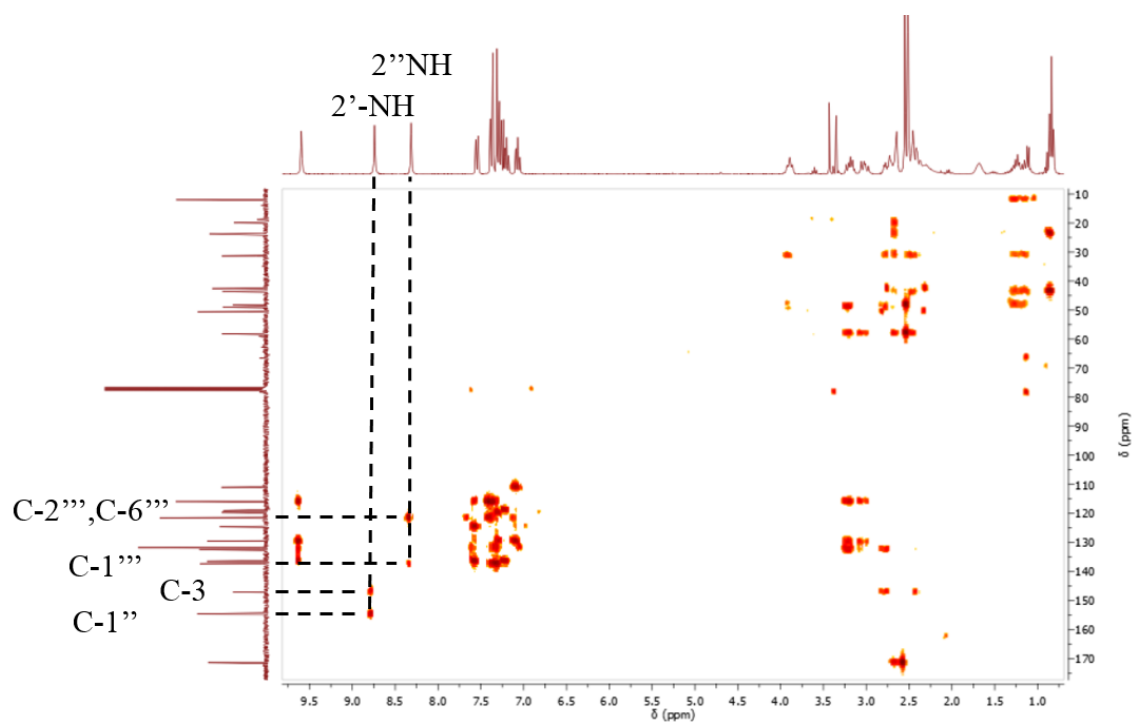

**Figure S72.** HMBC spectrum of compound **29** (300 MHz, CDCl<sub>3</sub>).

## VI) Computational Studies

**Table S4.** Molecular descriptors used for the univariate linear regression.

| Compd.    | Descriptor |        |        |              |            | FAR <sub>exp</sub> |
|-----------|------------|--------|--------|--------------|------------|--------------------|
|           | EEig11x    | X5     | WTPT-2 | GCUT_SLOGP_3 | GCUT_SMR_3 |                    |
| <b>1</b>  | 1.895      | 7.956  | 2.062  | 3.113        | 3.340      | 1.03               |
| <b>3</b>  | 2.256      | 8.764  | 2.054  | 3.183        | 3.408      | 1.22               |
| <b>4</b>  | 2.746      | 10.039 | 2.069  | 3.185        | 3.412      | 33.93              |
| <b>5</b>  | 2.746      | 10.039 | 2.069  | 3.187        | 3.414      | 22.72              |
| <b>6</b>  | 2.760      | 10.480 | 2.062  | 3.189        | 3.416      | 24.34              |
| <b>7</b>  | 2.741      | 10.286 | 2.068  | 3.191        | 3.418      | 25.06              |
| <b>8</b>  | 2.740      | 10.127 | 2.069  | 3.185        | 3.412      | 23.61              |
| <b>9</b>  | 2.740      | 10.127 | 2.069  | 3.184        | 3.411      | 22.6               |
| <b>10</b> | 2.763      | 10.391 | 2.054  | 3.191        | 3.417      | 15.69              |
| <b>11</b> | 2.801      | 10.719 | 2.053  | 3.190        | 3.416      | 15.88              |
| <b>12</b> | 2.741      | 10.313 | 2.062  | 3.197        | 3.424      | 26.51              |
| <b>13</b> | 2.740      | 10.127 | 2.069  | 3.186        | 3.413      | 5.25               |
| <b>14</b> | 2.741      | 10.225 | 2.068  | 3.190        | 3.416      | 16.63              |
| <b>15</b> | 2.778      | 10.648 | 2.065  | 3.194        | 3.420      | 26.51              |
| <b>16</b> | 2.920      | 11.843 | 2.080  | 3.201        | 3.426      | 104.59             |
| <b>17</b> | 2.807      | 11.433 | 2.055  | 3.209        | 3.432      | 100.07             |
| <b>18</b> | 2.930      | 11.494 | 2.090  | 3.202        | 3.427      | 126.58             |
| <b>19</b> | 2.912      | 11.888 | 2.084  | 3.213        | 3.436      | 128.48             |
| <b>20</b> | 2.918      | 11.139 | 2.090  | 3.196        | 3.423      | 106.19             |
| <b>21</b> | 2.933      | 11.384 | 2.084  | 3.200        | 3.427      | 95.56              |
| <b>22</b> | 2.698      | 9.333  | 2.043  | 3.197        | 3.431      | 2.93               |
| <b>23</b> | 2.708      | 8.987  | 2.033  | 3.201        | 3.436      | 1.10               |
| <b>24</b> | 2.709      | 10.243 | 2.066  | 3.220        | 3.451      | 1.82               |
| <b>25</b> | 2.743      | 10.243 | 2.066  | 3.189        | 3.423      | 5.93               |
| <b>26</b> | 2.743      | 10.534 | 2.061  | 3.195        | 3.428      | 8.77               |
| <b>27</b> | 2.743      | 10.631 | 2.060  | 3.195        | 3.427      | 3.20               |
| <b>28</b> | 2.743      | 10.534 | 2.061  | 3.190        | 3.423      | 7.80               |
| <b>29</b> | 2.743      | 10.534 | 2.061  | 3.190        | 3.424      | 7.44               |
| <b>30</b> | 2.908      | 10.719 | 2.054  | 3.193        | 3.426      | 7.29               |
| <b>31</b> | 2.897      | 10.798 | 2.047  | 3.196        | 3.428      | 4.80               |
| <b>32</b> | 2.743      | 10.566 | 2.061  | 3.201        | 3.436      | 6.60               |

EEig11x: Eigenvalue 11 from edge adj. Matrix weighted by edge degrees; X5: Connectivity index of order 5; WTPT-2: Weighted path descriptor described by Randic (molecular ID/number of atoms); GCUT\_SLOGP\_3: Largest GCUT descriptor using atomic contribution to logP; GCUT\_SMR\_3: Largest GCUT descriptor using atomic contribution to molar refractivity.



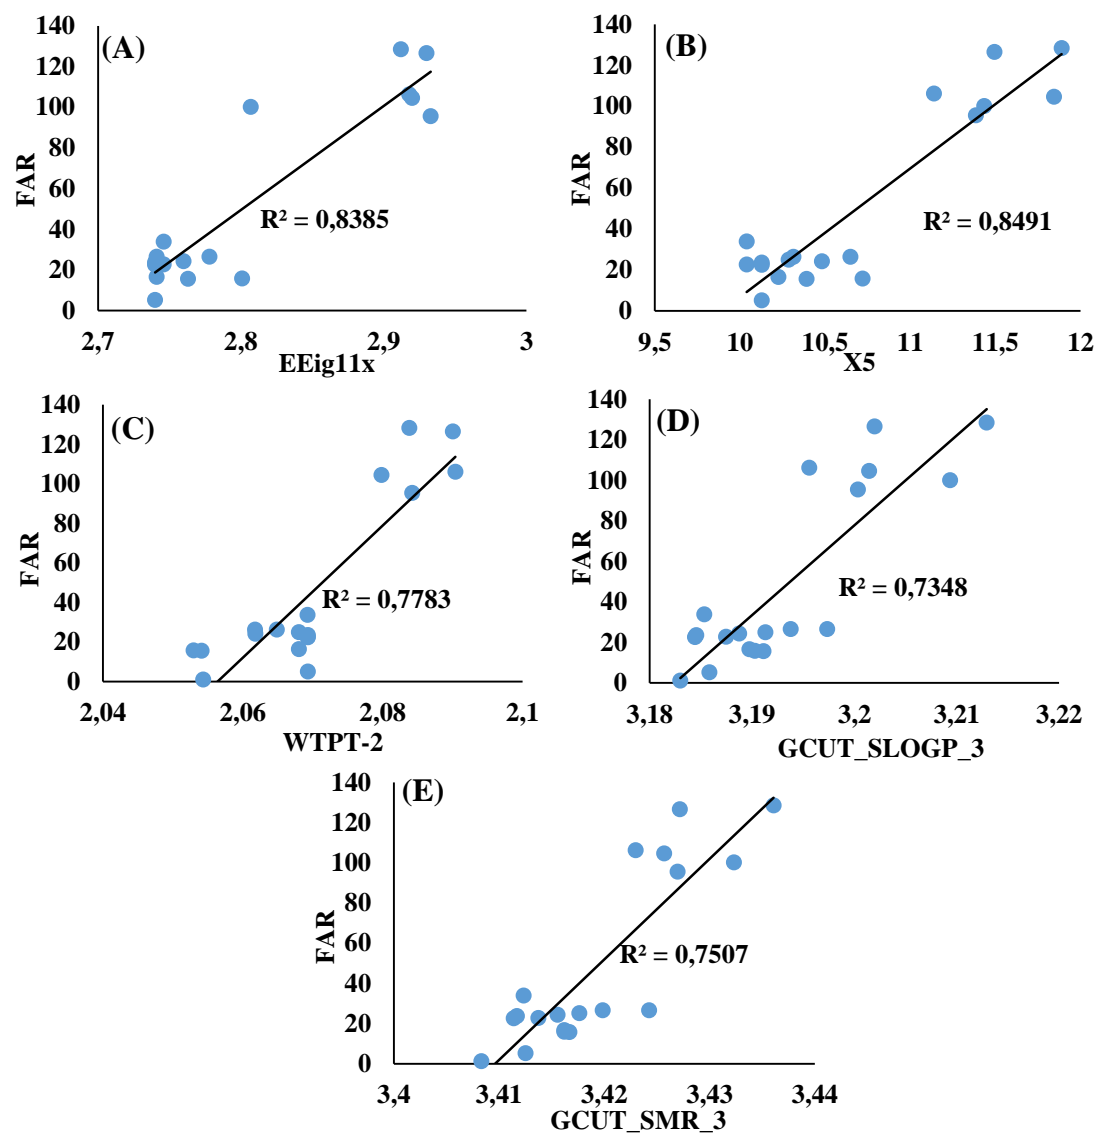

**Figure S73.** Representative plots of molecular descriptors (A) EEig11x, (B) X5, (C) WTPT-2, (D) GCUT\_SLOGP\_3 and (E) GCUT\_SMR\_3 *versus* experimental FAR values for the azines 3-19. No correlation was found for semicarbazones set (22-32), thus were not represented.

**Table S5.** Molecular descriptors used for the multivariate linear regression model.

| Compd.    | Descriptor |           |       |       |       | FAR <sub>exp</sub> | FAR <sub>pred</sub> |
|-----------|------------|-----------|-------|-------|-------|--------------------|---------------------|
|           | h_logD     | vsurf_HL2 | PW4   | BIC3  | BEHv2 |                    |                     |
| <b>1</b>  | 1.804      | 0.045     | 0.217 | 0.879 | 3.749 | 1.03               | 3.97                |
| <b>3</b>  | 2.479      | 0.048     | 0.203 | 0.868 | 3.752 | 1.22               | 4.75                |
| <b>4</b>  | 4.134      | 0.074     | 0.205 | 0.881 | 3.818 | 33.93              | 34.21               |
| <b>5</b>  | 2.795      | 0.067     | 0.205 | 0.883 | 3.806 | 22.72              | 8.77                |
| <b>6</b>  | 3.292      | 0.074     | 0.200 | 0.883 | 3.833 | 24.34              | 15.46               |
| <b>7</b>  | 3.183      | 0.044     | 0.205 | 0.872 | 3.81  | 25.06              | 33.83               |
| <b>8</b>  | 4.093      | 0.062     | 0.200 | 0.876 | 3.815 | 23.61              | 33.98               |
| <b>9</b>  | 3.940      | 0.061     | 0.200 | 0.876 | 3.808 | 22.6               | 29.95               |
| <b>10</b> | 4.027      | 0.056     | 0.192 | 0.872 | 3.831 | 15.69              | 31.66               |
| <b>11</b> | 4.250      | 0.055     | 0.193 | 0.874 | 3.809 | 15.88              | 29.34               |
| <b>12</b> | 3.353      | 0.046     | 0.197 | 0.855 | 3.826 | 26.51              | 43.64               |
| <b>13</b> | 2.756      | 0.072     | 0.200 | 0.878 | 3.805 | 5.25               | 3.38                |
| <b>14</b> | 3.168      | 0.073     | 0.201 | 0.86  | 3.809 | 16.63              | 27.80               |
| <b>15</b> | 3.724      | 0.041     | 0.198 | 0.881 | 3.812 | 26.51              | 27.04               |
| <b>16</b> | 4.806      | 0.032     | 0.196 | 0.86  | 3.834 | 104.59             | 69.76               |
| <b>17</b> | 3.071      | 0.059     | 0.216 | 0.814 | 3.829 | 100.07             | 96.92               |
| <b>18</b> | 4.354      | 0.037     | 0.208 | 0.853 | 4.001 | 126.58             | 130.02              |
| <b>19</b> | 3.958      | 0.051     | 0.213 | 0.86  | 4.009 | 128.48             | 121.96              |
| <b>20</b> | 3.402      | 0.062     | 0.211 | 0.855 | 3.996 | 106.19             | 106.25              |
| <b>21</b> | 3.989      | 0.038     | 0.211 | 0.891 | 4.007 | 95.56              | 97.27               |
| <b>22</b> | 2.603      | 0.061     | 0.193 | 0.87  | 3.752 | 2.93               | -13.50              |
| <b>23</b> | 1.881      | 0.073     | 0.194 | 0.84  | 3.752 | 1.1                | -3.00               |
| <b>24</b> | 2.096      | 0.089     | 0.202 | 0.84  | 3.753 | 1.82               | 6.70                |
| <b>25</b> | 2.707      | 0.080     | 0.202 | 0.865 | 3.779 | 5.93               | 6.38                |
| <b>26</b> | 3.201      | 0.072     | 0.198 | 0.878 | 3.812 | 8.77               | 10.02               |
| <b>27</b> | 2.576      | 0.077     | 0.199 | 0.867 | 3.79  | 3.2                | 2.00                |
| <b>28</b> | 3.359      | 0.074     | 0.198 | 0.882 | 3.788 | 7.8                | 1.82                |
| <b>29</b> | 3.498      | 0.083     | 0.198 | 0.882 | 3.796 | 7.44               | 3.20                |
| <b>30</b> | 2.635      | 0.082     | 0.195 | 0.869 | 3.814 | 7.29               | 0.89                |
| <b>31</b> | 3.425      | 0.066     | 0.190 | 0.878 | 3.813 | 4.8                | 4.78                |
| <b>32</b> | 3.126      | 0.064     | 0.194 | 0.871 | 3.809 | 6.6                | 10.88               |

h\_logD: Octanol/water distribution coefficient at pH 7 calculated as a state average; vsurf\_HL2: Second\_hydrophilic\_lipophilic balance; PW4: path/walk 4 – Randic shape index; BIC3: Bond Information Content index (neighbourhood symmetry of 3-order); BEHv2: Largest eigenvalue n. 2 of Burden matrix weighted by van der Waals volume.
